# Supplementary material
Source: publisher figshare collection journal article supplement (https://springernature.figshare.com/ndownloader/files/35501414)
Supplement: Supplementary file 1 [file 35501414]

Binomial	meanTb	SVL	log10Mass	Tpref	CTmax	CTmin	skin_absorbance	Tb_imputed	Tpref_imputed	CTmax_imputed	CTmin_imputed	Mass_sensitivity	abs_sensitivity	Tpref_sensitivity	CTmax_sensitivity	CTmin_sensitivity	References_fromMeiri_2018
Ablepharus budaki	NA	48	0.303727955	NA	NA	NA	NA	28.13081853	29.23105963	40.4373217	8.295153604	-0.000911862	-0.083657991	-0.005235212	0.016972842	-0.010590581	Gocmen et al. 1996, Baier et al. 2009, Schmidtler 1997, Franzen et al. 2008
Ablepharus deserti	NA	58.8	0.588319386	NA	NA	NA	NA	28.77747514	29.50106142	40.62948171	7.681652271	-0.000759141	-0.079012752	-0.005482875	0.01594829	-0.01165275	Szczerbak 2003, Jablonski 2016
Ablepharus grayanus	NA	34.9	-0.143216696	NA	NA	NA	NA	29.75254719	30.35464768	40.99281846	9.316260284	-0.000481509	-0.096676633	0.001031663	0.01590707	-0.005303422	Minton 1966, Tikader and Sharma 1992, Greene 1982, Khan 2006, Greer 1973, Karamiani et al. 2018
Ablepharus kitaibelii	27	58	0.569108991	NA	NA	NA	NA	27	28.46538876	40.05291169	7.685186201	-0.001393986	0.013888459	-0.010495197	0.015610143	-0.013207252	Arnold and Ovenden 2004, Baran and Atatur 1998, Street 1979, Rogner 1997b, Atatur and Gocmen 2001, Herczeg et al. 2007, Valakos et al. 2008, Valakos et al. 2004, Arbel 1984, Kwet 2009, Kohler 2005, Schmidtler 1997, Stojanov et al. 2011, Tomovic et al. 2015, Speybroeck et al. 2016, Kwet 2015, Vergilov et al. 2016, Vergilov and Natchev 2017, Stille and Stille 2017, Vergilov et al. 2018
Ablepharus pannonicus	NA	55	0.494631124	NA	NA	NA	NA	28.62609834	29.4482682	40.58621477	7.884962223	-0.000432682	-0.110472785	-0.002013592	0.015367736	-0.008256714	Smith 1935, Szczerbak 2003, Anderson 1999, Arnold 1972, Khan 2006, Clark 1990, Jongbloed 2000, Eremchenko 2007, Weber 1960, van der Kooij 2001, Fathinia et al. 2009, Grossmann et al. 2012, Ataev et al. 1994, Gardner 2013, Karamiani et al. 2018
Ablepharus rueppellii	29.5	52	0.415974797	NA	NA	NA	NA	29.5	29.99134911	40.87527291	8.077520236	-0.000612141	-0.137136984	-0.001879402	0.017656894	-0.008913685	Amitai and Bouskila 2001, Arbel 1984, Disi et al. 2001, El Din 2006, Bar and Haimovitch 2012, Roll et al. 2013, Goldberg 2013, Werner 1995, Werner 2016, TAU experimental zoo data
Abronia cuetzpali	NA	115	1.406228484	NA	NA	NA	NA	NA	NA	NA	NA	-0.000969506	0.099148063	-0.015053792	0.005949384	-0.013197224	Campbell et al. 2016
Acanthodactylus aegyptius	32	52	0.520925867	NA	NA	NA	NA	32	32.70534677	42.68314492	8.840055547	-0.000899015	-0.174055694	0.000291468	0.024773912	-0.00886564	Baha El Din 2007, Werner and Ashkenazi 2010, Bar and Haimovitch 2012, Bar 2003, Werner 2016
Acanthodactylus aureus	NA	70.4	0.909186917	NA	NA	NA	NA	35.99310346	34.89924085	43.9565319	8.071033588	-0.00026738	-0.291155074	0.002783633	0.024524911	-0.009166233	Schleich et al. 1996, Geniez et al. 2004, Vanhooydonck and Van Damme 1999, Bons and Geniez 1996, Verwaijen and Van Damme 2008, Trape et al. 2012
Acanthodactylus bedriagai	NA	77	1.02403413	NA	NA	NA	NA	36.9032001	35.38912884	44.24508765	7.837635935	-0.000349839	-0.148976897	-0.000250489	0.015948356	-0.007313825	Schleich et al. 1996
Acanthodactylus beershebensis	37.8	90	1.223969645	NA	NA	NA	NA	37.8	35.83848399	44.52392662	7.416296819	-0.000508861	-0.107322132	-0.002844808	0.014827895	-0.009165702	Amitai and Bouskila 2001, Moravec et al. 1999, Werner 2004, Arbel 1984, Hawlena et al. 2010, Hawlena and Perez-Mellado 2009, Duvdevani and Borut 1974, Bar and Haimovitch 2012, Goldberg 2014, Werner 1995, Werner 2016, TAU experimental zoo data
Acanthodactylus blanci	NA	95	1.293262359	NA	NA	NA	NA	36.77590499	36.06490063	45.11569285	7.73308131	-0.000267434	-0.157818239	-0.000277122	0.016329668	-0.007645056	Schleich et al. 1996
Acanthodactylus blanfordii	NA	75	0.990305788	NA	NA	NA	NA	37.76974416	35.91061017	44.52890573	7.93095049	-0.000228777	-0.114211132	0.001757889	0.013970192	-0.004699101	Anderson 1999, Minton 1966, Khan 2006, Clark 1990, van der Kooij 2001, Gardner 2013, Khan 2015
Acanthodactylus boskianus	39.2	95	1.293262359	NA	NA	NA	NA	39.2	36.63338118	44.974619	7.294066369	-0.000326827	-0.136542537	0.000275054	0.015905406	-0.006647968	Frankenberg and Werner 1992, Schleich et al. 1996, Amitai and Bouskila 2001, Arbel 1984, Anderson 1999, Perry and Garland 2002, Disi et al. 2001, Baran and Atatur 1998, Perez-Mellado 1992, Leviton et al. 1992, Geniez et al. 2004, Flower 1933, Papenfuss 1969, Dunger 1967, Arnold 1984, El Din 2006, Vanhooydonck and Van Damme 1999, Rogner 1997b, Arnold 1980, Reed and Marx 1959, Schatti and Desvoigne…
Acanthodactylus busacki	NA	73.6	0.96615643	NA	NA	NA	NA	36.88202661	35.39896696	44.24187438	7.964814958	-0.00026738	-0.291155074	0.002783633	0.024524911	-0.009166233	Geniez et al. 2004, Trape et al. 2012, Tamar et al. 2017
Acanthodactylus cantoris	NA	94	1.279700296	NA	NA	NA	NA	35.57647723	34.51223383	43.79761269	7.244813517	-0.000381891	-0.088195286	0.001704805	0.015008099	-0.004288988	Smith 1935, Tikader and Sharma 1992, Khan 2006, Das 2002, Masroor 2012, Leviton 1959, Joshi and Das 2015, Agarwal et al. 2015, Das and Das 2017
Acanthodactylus dumerilii	NA	68	0.864733801	NA	NA	NA	NA	35.42466943	34.58277037	43.77457443	8.156650608	-0.000267725	-0.152371398	0.000718346	0.01636972	-0.006735947	Clobert et al. 1998, Schleich et al. 1996, Geniez et al. 2004, Bons and Geniez 1996, Al-Johany and Spellerberg 1988, Cisse and Karns 1978, Cisse et al. 1977, Trape et al. 2012
Acanthodactylus erythrurus	37.8	84	1.135548173	37.5	46.3	NA	NA	37.8	37.5	46.3	8.548837647	-0.000927152	-0.01188261	-0.010048877	0.014877811	-0.014717955	Bauwens and Diaz-Uriarte 1997, Arnold and Ovenden 2004, Cox et al. 2003, Cooper and Vitt 2002, Arnold 1987, Pianka and Vitt 2003, Papenfuss 1969, Rogner 1997b, Le Berre 1989, Boulenger 1921, Verwaijen and Van Damme 2008, Andrews and Pough 1980, Belliure 2006, Warne and Charnov 2008, Radder et al. 2008, Schleich et al. 1996, Kwet 2009, Malkmus 2004, Amat 2008, Sinervo et al. 2010, Kohler 2005, Sil…
Acanthodactylus felicis	NA	65	0.806907315	NA	NA	NA	NA	37.91146133	36.06431892	44.58659978	8.338507571	-0.000405551	-0.171329342	0.002045186	0.019187426	-0.005696457	Arnold 1980, Schatti and Desvoignes 1999, van der Kooij 2001, Gardner 2013
Acanthodactylus gongrorhynchatus	NA	65	0.806907315	NA	NA	NA	NA	35.40351468	34.59259979	43.771364	8.283717095	-0.000204891	-0.163709981	0.002642181	0.017371445	-0.006057013	Leviton et al. 1992, Leviton and Anderson 1967, Jongbloed 2000, Hornby 1996, Gardner 2013
Acanthodactylus grandis	NA	103	1.39688265	NA	NA	NA	NA	35.61934622	34.49231503	43.80411846	6.987319916	-0.000417192	-0.10954755	-0.00147218	0.015393159	-0.007756637	Anderson 1999, Disi et al. 2001
Acanthodactylus guineensis	NA	60	0.70432434	NA	NA	NA	NA	35.3659866	34.61003698	43.76566876	8.509130384	-0.001415688	-0.106479974	0.000587641	0.026615375	-0.006759791	Papenfuss 1969, Hughes 1988, Dunger 1967, Chirio and LeBreton 2007, Trape et al. 2012
Acanthodactylus hardyi	NA	52	0.520925867	NA	NA	NA	NA	35.29889368	34.64121128	43.75548678	8.912125643	-0.000212629	-0.115005962	0.000557749	0.014983595	-0.006180627	Rifai et al. 2003
Acanthodactylus harranensis	NA	94.8	1.290561403	NA	NA	NA	NA	35.58045056	34.51038765	43.79821568	7.220947588	-0.000750595	-0.072295221	-0.005672427	0.014881794	-0.010235878	Baran et al. 2005
Acanthodactylus khamirensis	NA	48.4	0.428978662	NA	NA	NA	NA	35.2652565	34.65684059	43.75038202	9.114168152	NA	NA	NA	NA	NA	Heidari et al. 2013
Acanthodactylus longipes	34.3	65	0.806907315	NA	NA	NA	NA	34.3	33.94503272	43.41265435	8.259608889	-0.000153409	-0.121151019	0.00029955	0.013379405	-0.006072045	Schleich et al. 1996, Amitai and Bouskila 2001, Perez-Mellado 1992, Geniez et al. 2004, Joger and Lambert 1996, El Din 2006, Vanhooydonck and Van Damme 1999, Arnold 1998, Bons and Geniez 1996, Arnold 1994, Attum and Eason 2006, Baha El Din 1996, Baha el Din 1994, Trape et al. 2012, Ineich et al. 2014
Acanthodactylus maculatus	NA	62	0.746347876	NA	NA	NA	NA	37.03696348	35.57443879	44.30617401	8.452958455	-0.000340307	-0.155053194	-0.000378501	0.016247937	-0.007637454	Schleich et al. 1996, Trape et al. 2012
Acanthodactylus margaritae	NA	71	0.920063387	NA	NA	NA	NA	NA	NA	NA	NA	-0.00072786	-0.185182423	-0.000459309	0.021089692	-0.010085297	Tamar et al. 2017
Acanthodactylus masirae	NA	52	0.520925867	NA	NA	NA	NA	35.29889368	34.64121128	43.75548678	8.912125643	-0.000413076	-0.213230133	0.002836311	0.021004754	-0.007095796	Arnold 1980, Gardner 2013
Acanthodactylus micropholis	NA	65	0.806907315	NA	NA	NA	NA	35.40351468	34.59259979	43.771364	8.283717095	-0.000238782	-0.138260749	0.00145245	0.015086284	-0.00541147	Anderson 1999, Minton 1966, Khan 2006, Khan 2015
Acanthodactylus opheodurus	35.1	62.2	0.750475425	NA	NA	NA	NA	35.1	34.43619765	43.67628093	8.40153934	-0.000328381	-0.168199743	0.001066917	0.016895758	-0.006941359	Amitai and Bouskila 2001, Anderson 1999, Disi et al. 2001, Arnold 1980, Schatti and Desvoignes 1999, Hornby 1996, AL-Sadoon and Spellerberg 1985, van der Kooij 2001, Bar and Haimovitch 2012, Gardner 2013, Werner 2016
Acanthodactylus pardalis	37.8	77	1.02403413	NA	NA	NA	NA	37.8	35.91539106	44.53660238	7.857228095	-0.000542307	-0.155918575	-0.004418	0.018227241	-0.010852326	Clobert et al. 1998, Fitch 1970, Frankenberg and Werner 1992, Flower 1933, El Din 2006, Vanhooydonck and Van Damme 1999, Rogner 1997b, Moravec et al. 1999, Werner 2004, Le Berre 1989, Anderson 1898, Nagy et al. 1999, Andrews and Pough 1980, Brown and Nagy 2007, Schleich et al. 1996, Arbel 1984, Sinervo et al. 2010, Kohler 2005, Turner 1977, Castanet 1994, Cisse et al. 1977
Acanthodactylus robustus	NA	77.2	1.027358653	NA	NA	NA	NA	35.48416272	34.55512719	43.78360309	7.799302789	-0.000508861	-0.107322132	-0.002844808	0.014827895	-0.009165702	Disi et al. 2001
Acanthodactylus savignyi	NA	75	0.990305788	NA	NA	NA	NA	35.47060761	34.56142548	43.78154598	7.880721836	-0.000601185	-0.133395239	-0.003130101	0.017692127	-0.010530872	Schleich et al. 1996
Acanthodactylus schmidti	39.9	105	1.421529622	NA	NA	NA	NA	39.9	36.99481762	45.19402969	7.026482647	-0.000231737	-0.153454924	0.001264587	0.015833057	-0.006615595	Anderson 1999, Perry and Garland 2002, Disi et al. 2001, Gallagher 1971, Arnold 1984, Arnold 1980, Schatti and Desvoignes 1999, Anderson 1963, Jongbloed 2000, Hornby 1996, AL-Sadoon and Spellerberg 1985, AL-Sadoon and Abdo 1991, AL-Johany and Spellerberg 1989, Arnold 1994, van der Kooij 2001, Al-Johany and Spellerberg 1988, Gardner 2013
Acanthodactylus schreiberi	40.6	93	1.265993181	NA	NA	NA	NA	40.6	37.46542181	45.43143332	7.384790372	-0.001029939	-0.09603541	-0.006084283	0.01686912	-0.011298256	Frankenberg and Werner 1992, Amitai and Bouskila 2001, Arbel 1984, Zinner 1967, Reed and Marx 1959, Atatur and Gocmen 2001, Andrews and Pough 1980, Martens 1997, Sinervo et al. 2010, Kohler 2005, Baier et al. 2009, Duvdevani and Borut 1974, Perry et al. 1990, Bar and Haimovitch 2012, Yalcinkaya and Gocmen 2012, Zotos et al. 2012, Savvides et al. 2017
Acanthodactylus scutellatus	39.3	85	1.15071525	NA	NA	NA	NA	39.3	36.74689549	45.01616248	7.610619798	-0.000199752	-0.129465094	0.000249583	0.014235675	-0.006425467	Frankenberg and Werner 1992, Schleich et al. 1996, Disi et al. 2001, Perez-Mellado 1992, Flower 1933, El Din 2006, Vanhooydonck and Van Damme 1999, Le Berre 1989, Anderson 1898, Arbel 1984, Amitai and Bouskila 2001, Ibrahim 2008, Subach et al. 2009, Sinervo et al. 2010, Rifai et al. 2003, Baha El Din 1996, Tomasevic-Kolarov et al. 2010, Al-Hashem 2009, Duvdevani and Borut 1974, Perry 1990, Perry …
Acanthodactylus senegalensis	NA	60	0.70432434	NA	NA	NA	NA	35.3659866	34.61003698	43.76566876	8.509130384	-0.00023806	-0.118810562	0.001316361	0.014758766	-0.005265902	Geniez et al. 2004, Trape et al. 2012, Ineich et al. 2014
Acanthodactylus spinicauda	NA	56	0.615902868	NA	NA	NA	NA	35.33363925	34.62506697	43.76075975	8.703425535	-0.000413179	-0.152288149	-0.000479881	0.016166206	-0.007629852	Schleich et al. 1996, Dellaoui et al. 2015
Acanthodactylus taghitensis	NA	55	0.592810297	NA	NA	NA	NA	35.32519126	34.62899228	43.75947768	8.754168579	-0.000136433	-0.127352918	0.000577665	0.014298723	-0.006076263	Geniez et al. 2004, Trape et al. 2012
Acanthodactylus tilburyi	NA	65	0.806907315	NA	NA	NA	NA	35.40351468	34.59259979	43.771364	8.283717095	-0.000268081	-0.141694157	0.000190675	0.015012916	-0.00700226	Disi et al. 2001, Modry et al. 1999
Acanthodactylus tristrami	NA	95	1.293262359	NA	NA	NA	NA	35.58143866	34.50992854	43.79836563	7.215012575	-0.000516516	-0.124830747	-0.002603025	0.015284554	-0.0089297	Disi et al. 2001, Boulenger 1921, Riney 1953
Acratosaura mentalis	NA	59	0.669353342	NA	NA	NA	NA	30.45769249	31.2121423	41.67714279	9.857144666	-0.001879815	-0.037392943	-0.005017031	0.024971987	-0.010592136	Pianka and Vitt 2003, Delfim and Freire 2007, Rodrigues 2003, Rodrigues 1996, de-Carvalho et al. 2010, Centeno et al. 2014, Mesquita et al. 2016
Adolfus alleni	NA	70	0.901884316	NA	NA	NA	NA	34.2293964	33.72669989	43.23551618	8.027855636	-0.001916659	-0.125853179	-0.000428562	0.029747771	-0.009014399	Fitch 1970, Spawls et al. 2002, Loveridge 1936, 1942, Arnold 1989, Arnold 1998, Branch 2005, Wagner et al. 2014
Adolfus masavaensis	NA	55.5	0.604408593	NA	NA	NA	NA	34.12057042	33.77726519	43.21900082	8.681521417	-0.001916659	-0.125853179	-0.000428562	0.029747771	-0.009014399	Wagner et al. 2014, Branch 2014
Agama aculeata	36.2	118	1.747193633	NA	NA	NA	NA	36.2	35.65256544	44.02607153	8.702413289	-0.001434894	-0.139882892	-0.001657121	0.023059501	-0.008517182	Fitzsimons 1943, Branch 1998, Parker 1936, Auerbach 1987, Meik et al. 2002, Barts 2003, Kohler 2005, Pienaar 1966, Haagner and Mccartney 1992, Heideman 1994, Heideman 2002, Schleicher 2015, Branch 2016, Huey and Pianka 2017, Pianka et al. 2017,
Agama boensis	NA	81	1.239845984	36	NA	NA	NA	35.97483029	35.71558684	43.98504306	9.816382052	-0.001408861	-0.080140555	0.001394187	0.026695057	-0.004877758	Mediannikov et al. 2012, Trape et al. 2012, Chirio 2013
Agama boueti	NA	110	1.652524287	NA	NA	NA	NA	36.12580099	35.64543925	44.00795428	8.909572974	-0.000327866	-0.116919508	0.00142812	0.015742786	-0.005073487	Le Berre 1989, Chirio 2009, Cisse and Karns 1978, Mediannikov et al. 2012, Trape et al. 2012, Ineich et al. 2014, Mediani and Chevalier 2016
Agama etoshae	NA	85	1.304845764	NA	NA	NA	NA	36.48388962	35.98931146	44.14639749	9.684154942	-0.001563586	-0.150729839	-0.00197345	0.024095258	-0.009697606	Branch 1998, Barts 2003, Kohler 2005, Schleicher 2015
Agama gracilimembris	NA	57.6	0.780111811	NA	NA	NA	NA	35.80664507	35.79373305	43.95951938	10.82659053	-0.001772131	-0.092812392	0.001272784	0.029583179	-0.005809956	Hughes 1988, Garthshore 1985, Chirio and LeBreton 2007, Chirio 2009, Mediannikov et al. 2012, Trape et al. 2012
Agama hispida	36.9	134	1.918660399	NA	NA	NA	NA	36.9	35.99738479	44.24274341	8.339558788	-0.000587207	-0.172561729	-0.00106383	0.017641057	-0.008753401	Fitch 1970, Fitzsimons 1943, Pianka 1986, Pianka and Vitt 2003, Broadley 1971, Murphy et al. 2003, Auerbach 1987, Huey et al. 2001, Barts 2003, Sinervo et al. 2010, Kohler 2005, Pienaar 1966, Pianka 1971, Huey and Pianka 2007, Curry-Lindahl 1979, Huey and Pianka 1977, Mesquita et al. 2016, Schleicher 2015, Branch 2016
Agama persimilis	NA	64	0.922188819	NA	NA	NA	NA	35.85862131	35.76958261	43.96740726	10.51439403	-0.00104792	-0.145799758	-8.59E-05	0.024168605	-0.007942383	Spawls et al. 2002, Parker 1942, Largen and Spawls 2010, Kenya Reptile Atlas (http://kenyareptileatlas.com/)
Agama robecchii	NA	137	1.948517361	NA	NA	NA	NA	35.65949641	35.43577989	43.87992763	8.229030515	-0.000460388	-0.188982	0.000390956	0.02042639	-0.006450101	Parker 1932, Largen and Spawls 2006, Largen and Spawls 2010
Agama rueppelli	NA	95	1.454831794	NA	NA	NA	NA	36.05347886	35.67904328	43.99697872	9.343977559	-0.001225436	-0.150822827	0.0003599	0.026445909	-0.00832939	Spawls et al. 2002, Parker 1932, Damuth 1987, Western 1974, Kenya Reptile Atlas (http://kenyareptileatlas.com/)
Agama sankaranica	NA	85	1.304845764	NA	NA	NA	NA	35.99860925	35.7045381	43.98865174	9.673553144	-0.001062854	-0.135132491	0.001952997	0.026122476	-0.006400297	Joger and Lambert 1996, Papenfuss 1969, Hughes 1988, Bohme et al. 1996, Chirio and LeBreton 2007, Joger and Lambert 2002, Leache et al. 2006, Chirio 2009, Mediannikov et al. 2012, Trape et al. 2012, Segniagbeto et al. 2015
Algyroides marchi	NA	53	0.545338091	NA	NA	NA	NA	32.61518869	33.35227271	43.03263149	7.682386337	-0.000961031	-0.059105834	-0.008110013	0.017951979	-0.014413909	Arnold and Ovenden 2004, Arnold 1987, Rogner 1997b, Rubio and Palacios 1986, Rubio and Carrascal 1994, Valverde 1958, Amat 2008, Kohler 2005, Siliceo and Diaz 2010, Cardenete and Cardenete 2010, Maso and Pijoan 2011, Speybroeck et al. 2016, Carneiro et al. 2017, Kwet 2015
Alopoglossus angulatus	27.3	64	0.786006274	NA	NA	NA	NA	27.3	29.31426616	40.64330424	9.530896779	-0.002223603	0.003981543	-0.005225137	0.027555983	-0.007971824	Zug et al. 2001, Martins 1991, Zimmerman and Rodrigues 1990, Duellman 1990, Pianka and Vitt 2003, Dixon and Soini 1986, Hoogmoed 1973, Bartlett and Bartlett 2003, Vitt and Zani 1996b, Huey et al. 2001, Bartlett and Bartlett 2003, Sinervo et al. 2010, Avila-Pires et al. 2010, Anaya-Rojas et al. 2010, Gasc 1990, Kohler et al. 2012, Torres-Carvajal and Salazar-Valenzuela 2013, Vitt et al. 2008, Mesq…
Alopoglossus atriventris	26.2	55	0.568677601	NA	NA	NA	NA	26.2	28.75235909	40.29951554	9.986154938	-0.002137081	-0.000499682	-0.007217317	0.025672736	-0.008598488	Duellman and Mendelson 1995, Avila-Pires 1995, Duellman 1978, Duellman 1990, Dixon and Soini 1986, Bartlett and Bartlett 2003, Vitt and Zani 1996b, Huey et al. 2001, Bartlett and Bartlett 2003, Sinervo et al. 2010, Kohler 2005, Anaya-Rojas et al. 2010, Kohler et al. 2012, Torres-Carvajal and Salazar-Valenzuela 2013, Mesquita et al. 2016, Ribeiro-Junior and Amaral 2017, Pianka et al. 2017,
Alopoglossus buckleyi	NA	62.3	0.74739953	NA	NA	NA	NA	27.71139687	29.57053348	40.77948097	9.625026519	-0.001460572	0.006975762	-0.006811861	0.021723515	-0.010774191	Duellman and Mendelson 1995, Avila-Pires 1995, Rodrigues and Cadle 1990, Kohler 2005, Kohler et al. 2012, Ribeiro-Junior and Amaral 2017
Alopoglossus copii	NA	80	1.106003137	NA	NA	NA	NA	27.44526257	29.27641969	40.6702359	8.82835963	-0.001460572	0.006975762	-0.006811861	0.021723515	-0.010774191	Duellman and Mendelson 1995, Duellman 1978, Duellman 1990, Kohler et al. 2012, Torres-Carvajal and Salazar-Valenzuela 2013
Alopoglossus festae	NA	64.5	0.797166178	NA	NA	NA	NA	28.19570047	29.83559044	40.93375405	9.525853232	-0.00161255	-0.009353383	-0.004595534	0.024463522	-0.009768894	Kohler et al. 2012, Arteaga et al. 2013, Ortega-Andrade et al. 2010
Alopoglossus lehmanni	NA	33.3	-0.150889141	NA	NA	NA	NA	27.42311851	29.74690043	40.74272369	11.59978517	-0.001764529	-0.025682528	-0.002379208	0.027203528	-0.008763597	Ayala and Harris 1984, Fernando Castro Hererra, pers. Comm. April 2017
Alopoglossus viridiceps	NA	64.1	0.788245213	NA	NA	NA	NA	28.1924369	29.83710684	40.93325877	9.545455938	-0.00161255	-0.009353383	-0.004595534	0.024463522	-0.009768894	Torres-Carvajal and Lobos 2014
Amapasaurus tetradactylus	NA	36	-0.039089142	NA	NA	NA	NA	29.08900136	30.68147279	41.2771493	11.38961921	-0.0023738	0.002777889	-0.004198631	0.029184493	-0.007147823	Avila-Pires 1995, Avila-Pires et al. 2010, Dewynter and Surugue 2012, Jairam and Jairam-Doerga 2015, Ribeiro-Junior and Amaral 2017, Avila-Pires et al. 2013
Ameiva aggerecusans	NA	99.3	1.463512163	NA	NA	NA	NA	37.76649133	35.50146953	44.91593422	10.429961	-0.000814697	0.215416896	-0.022473878	0.000874716	-0.016326847	Koch et al. 2013, Koch 2013
Ameiva ameiva	39.4	210	2.475102007	NA	NA	NA	NA	39.4	36.07093141	45.38279028	8.23472054	-0.002067783	-0.01135264	-0.005158184	0.026632296	-0.008891544	Anderson and Vitt 1990, Fitch 1985, Perry and Garland 2002, Conant and Collins 1998, Savage 2002, Cox et al. 2003, Avila-Pires 1995, Martins 1991, Vitt and de Carvalho 1992, Vitt and de Carvalho 1995, Duellman 1978, Beebe 1945, Kohler 2003, Rand and Myers 1990, Rodrigues and Cadle 1990, Zimmerman and Rodrigues 1990, Duellman 1990, Pianka and Vitt 2003, Schwartz and Henderson 1991, Cei 1993, Mesqu…
Ameiva atrigularis	38.6	190	2.339923699	NA	NA	NA	NA	38.6	35.65347114	45.13131163	8.515360982	-0.002533095	-0.033915253	0.000589574	0.034217486	-0.00654765	Ugueto and Harvey 2011
Ameiva bifrontata	38.8	128	1.806423006	NA	NA	NA	NA	38.8	35.97605164	45.23014736	9.696295392	-0.002086053	0.027643236	-0.006242017	0.025077916	-0.009006024	Vitt and de Carvalho 1992, Greene 1982, van Buurt 2005, Ruthven 1924, Radder et al. 2008, Fuenmayor et al. 2005, Ugueto et al. 2009, Sinervo et al. 2010, Ugueto and Rivas 2010, Schall 1973
Ameiva concolor	NA	128	1.806423006	NA	NA	NA	NA	36.83031072	34.82019396	44.58987809	9.653264089	-0.000814697	0.215416896	-0.022473878	0.000874716	-0.016326847	Harvey et al. 2012, Ruthven 1924, Koch et al. 2013, Koch 2013
Ameiva fuliginosa	NA	105	1.53889872	NA	NA	NA	NA	NA	NA	NA	NA	NA	NA	NA	NA	NA	Schwartz and Henderson 1991
Ameiva nodam	NA	101	1.486439472	NA	NA	NA	NA	36.71325068	34.87458517	44.57211313	10.35638797	-0.001137635	0.111196329	-0.014642869	0.011299116	-0.013550519	Koch et al. 2013, Koch 2013
Ameiva pantherina	NA	152	2.038533559	NA	NA	NA	NA	37.71997816	35.2529872	44.8643587	9.160811371	-0.002686027	-0.005714998	-0.00356604	0.030631827	-0.007207166	Ugueto and Harvey 2011
Ameiva parecis	38.2	90	1.330694204	NA	NA	NA	NA	38.2	35.80695177	45.06527156	10.73234416	-0.002122017	0.011627276	-0.004159839	0.027949541	-0.008559216	Mesquita and Colli 2003, Gainsbury and Colli 2003, Colli et al. 2003, Sinervo et al. 2010, Rocha et al. 2009, Mesquita et al. 2016, Ribeiro-Junior and Amaral 2016
Ameiva praesignis	NA	243	2.672235511	NA	NA	NA	NA	38.89728411	35.70009725	45.20687881	7.788986021	-0.002380163	-0.062115508	0.004745188	0.037803146	-0.005888135	Ugueto and Harvey 2011
Ameiva provitaae	33.3	135	1.87833802	NA	NA	NA	NA	33.3	32.72086597	43.43775221	9.417539252	-0.000786378	0.196169555	-0.022256457	0.001492937	-0.016318482	Garcia-Perez 1995, La Marca and Soriano 2004
Ameiva reticulata	NA	149.1	2.012515471	NA	NA	NA	NA	NA	NA	NA	NA	-0.001585884	0.031783554	-0.011558045	0.015209194	-0.011379219	Landauro et al. 2015
Ameivula apipensis	NA	63.3	0.855365538	NA	NA	NA	NA	NA	NA	NA	NA	-0.00153708	-0.005745833	-0.009088498	0.018527848	-0.011831368	Arias et al. 2018
Ameivula cipoensis	NA	71.3	1.016108438	NA	NA	NA	NA	37.8074484	35.6741211	44.95202542	11.41986684	-0.00153708	-0.005745833	-0.009088498	0.018527848	-0.011831368	Arias et al. 2014, Moura and Cruz 2017
Ameivula confusioniba	NA	76.5	1.111187063	NA	NA	NA	NA	37.84223115	35.65795952	44.95730403	11.21094343	-0.002156465	-0.1098709	0.004103533	0.037482437	-0.006627257	Arias et al. 2011
Ameivula jalapensis	37	58	0.73726106	NA	NA	NA	NA	37	35.30755359	44.7072341	12.01718765	-0.002579319	-0.099698461	0.001271594	0.036198886	-0.007426686	Colli et al. 2009, Mesquita et al. 2016, Nascimento et al. 2015, Sales and Freire 2016
Ameivula mumbuca	39.6	59	0.760349756	NA	NA	NA	NA	39.6	36.8244104	45.55092903	12.02307013	-0.002579319	-0.099698461	0.001271594	0.036198886	-0.007426686	Mesquita et al. 2006b, Uetz 2006, Colli et al. 2003, Colli et al. 2009, Sinervo et al. 2010, Mesquita et al. 2016, Nascimento et al. 2015, Sales and Freire 2016
Ameivula nigrigula	NA	90.1	1.3321941	NA	NA	NA	NA	37.92308248	35.62039246	44.96957398	10.72530804	-0.00222255	-0.069040054	-0.000945565	0.031416127	-0.009352904	Arias et al. 2011
Ameivula pyrrhogularis	NA	89	1.315602921	NA	NA	NA	NA	37.9170129	35.62321265	44.96865286	10.76176509	-0.002272579	-0.091990827	0.002951597	0.036581708	-0.006865462	Da Silva and Avila-Pires 2013, da Silva and Avila-Pires 2014
Amphisbaena pericensis	NA	153	0.107058563	NA	NA	NA	NA	26.93449857	27.53676534	40.02247248	10.79783493	-0.001137635	0.111196329	-0.014642869	0.011299116	-0.013550519	Koch 2013
Anadia altaserrania	NA	76	1.032446482	NA	NA	NA	NA	25.57983346	28.21003847	40.06852098	8.949825525	NA	NA	NA	NA	NA	Harris and Ayala 1987
Anadia escalerae	NA	66.7	0.845263504	NA	NA	NA	NA	25.51135604	28.24185607	40.05812888	9.361136762	-0.002652179	0.004728254	-0.005356213	0.029323328	-0.007385922	Myers et al. 2009, Kok et al. 2013
Anadia steyeri	NA	82	1.141413341	NA	NA	NA	NA	25.61969697	28.19151614	40.07457064	8.71038445	NA	NA	NA	NA	NA	Swain et al. 1980, Oftedal 1974
Andinosaura stellae	NA	50.1	0.434864171	NA	NA	NA	NA	NA	NA	NA	NA	-0.001764529	-0.025682528	-0.002379208	0.027203528	-0.008763597	Sanchez-Pacheco 2010, Arredondo and Sanchez-Pacheco 2010, Fernando Castro Hererra, pers. Comm. April 2017
Andinosaura vespertina	NA	68	0.87294443	NA	NA	NA	NA	NA	NA	NA	NA	-0.001460572	0.006975762	-0.006811861	0.021723515	-0.010774191	Kizirian 1996, Reyes-Puig et al. 2008, Sanchez-Pacheco et al. 2012
Anguis cephallonica	29	286	1.879810568	NA	NA	NA	NA	29	30.00694237	40.6332324	5.451867881	-0.001950022	-0.026951438	-0.008327579	0.020791745	-0.011853267	Arnold and Ovenden 2004, Grillitsch and Cabela 1990, Valakos et al. 2008, Speybroeck et al. 2016, Koppitz 2014
Anolis anisolepis	NA	56	0.569169175	NA	NA	NA	NA	29.41400274	29.15497271	38.15021625	10.48555496	-0.001689936	0.027808051	-0.007383977	0.022256729	-0.009721326	Kohler 2003, Fitch et al. 1976, Flores-Villela and Rubio-Perez 2008
Anolis barbouri	26.3	55	0.546147032	25.2	34.9	11.7	NA	26.3	25.2	34.9	11.7	NA	NA	NA	NA	NA	Schwartz and Henderson 1991, Flores et al. 1994, Thomas 1966, Howard et al. 1999, Sinervo et al. 2010, Kohler 2005, Henderson and Powell 2009, Losos 2009, Autumn and Losos 1997
Anolis bombiceps	NA	74	0.925279719	NA	NA	NA	NA	30.12307752	29.43409238	38.35813172	9.715691338	-0.001889737	0.000827883	-0.005724441	0.025354496	-0.009080946	Duellman and Mendelson 1995, Avila-Pires 1995, Dixon and Soini 1986, Bartlett and Bartlett 2003, Vanzolini and Williams 1970
Anolis campbelli	NA	51.3	0.457165288	NA	NA	NA	NA	29.3730282	29.17401127	38.14399798	10.73166953	-0.001689936	0.027808051	-0.007383977	0.022256729	-0.009721326	Kohler and Smith 2008
Anolis compressicauda	NA	55	0.546147032	NA	NA	NA	NA	29.40558052	29.15888604	38.1489381	10.53614325	-0.001689936	0.027808051	-0.007383977	0.022256729	-0.009721326	Kohler 2003, Aguilar-Lopez et al. 2015
Anolis gonavensis	NA	42.5	0.216720232	NA	NA	NA	NA	NA	NA	NA	NA	NA	NA	NA	NA	NA	Kohler and Hedges 2016
Anolis gracilipes	NA	55	0.546147032	NA	NA	NA	NA	29.40558052	29.15888604	38.1489381	10.53614325	-0.001764529	-0.025682528	-0.002379208	0.027203528	-0.008763597	Castro-Herrera 1988, Arteaga et al. 2013
Anolis granuliceps	NA	49	0.398556867	NA	NA	NA	NA	29.35158739	29.1839736	38.14074414	10.86045422	-0.001764529	-0.025682528	-0.002379208	0.027203528	-0.008763597	Castro-Herrera 1988, Ortega-Andrade et al. 2010, Rengifo et al. 2015
Anolis macrophallus	NA	54	0.522702441	NA	38.4	11.8	NA	29.39700375	29.16287118	38.14763649	10.58765981	NA	NA	NA	NA	NA	Kohler 2003, Kohler et al. 2006, Leenders and Watkins-Colwell 2004
Anolis morazani	NA	59	0.635846618	NA	NA	NA	NA	29.43839545	29.14363879	38.15391807	10.3390396	NA	NA	NA	NA	NA	Townsend and Wilson 2009, McCranie and Kohler 2015
Anolis nietoi	NA	50	0.424369753	NA	NA	NA	NA	29.36103056	29.1795859	38.14217722	10.80373362	-0.000969506	0.099148063	-0.015053792	0.005949384	-0.013197224	Kohler et al. 2014
Anolis ophiolepis	NA	39.8	0.132855998	NA	NA	NA	NA	29.25438566	29.22913778	38.12599286	11.44429873	NA	NA	NA	NA	NA	Schettino 1999, Schwartz and Henderson 1991, Flores et al. 1994, Henderson and Powell 2009
Anolis pseudopachypus	NA	48	0.37221172	NA	NA	NA	NA	24.58812171	25.95220011	35.45138786	10.47210661	NA	NA	NA	NA	NA	Kohler et al. 2007
Anolis quaggulus	NA	43.7	0.252296388	NA	NA	NA	NA	28.29555032	27.91315437	36.49997823	12.20700303	NA	NA	NA	NA	NA	Kohler 2003, Cope 1885, McCranie and Kohler 2015
Anolis sacamecatensis	NA	44	0.261037774	NA	NA	NA	NA	25.89202189	27.20672128	37.02489272	11.0881541	-0.000969506	0.099148063	-0.015053792	0.005949384	-0.013197224	Kohler et al. 2014
Anolis shrevei	29.2	60	0.657320979	NA	40.1	NA	NA	29.2	29.62551885	40.1	11.06700894	NA	NA	NA	NA	NA	Schwartz and Henderson 1991, Williams 1983, Flores et al. 1994, Sinervo et al. 2010, Henderson and Powell 2009
Anolis triumphalis	NA	54.5	0.53447851	NA	NA	NA	NA	NA	NA	NA	NA	-0.001440667	-0.009214351	-0.004961733	0.022968085	-0.008801853	Nicholson and Kohler 2014
Anolis uniformis	28.7	41	0.170810106	NA	35.6	12.4	NA	28.7	28.88921249	37.94337741	11.34848445	-0.001689936	0.027808051	-0.007383977	0.022256729	-0.009721326	Cox et al. 2003, Campbell 1999, Stafford and Meyer 2000, Lee 2000, Kohler 2003, Stuart 1955, D'Cruze and Stafford 2006, Birt et al. 2001, Sinervo et al. 2010, Lara-Resendiz et al. 2013, McCranie and Kohler 2015, Hernandez-Ordonez et al. 2015
Arthrosaura kockii	NA	71	0.934855067	NA	NA	NA	NA	29.2198326	30.38361074	41.25793015	9.244572593	-0.002481077	0.003012019	-0.004707865	0.029435523	-0.007289232	Avila-Pires 1995, Hoogmoed 1973, Donnely et al. 1992, Avila-Pires et al. 2010, Silva 2012, Ribeiro-Junior and Amaral 2017
Arthrosaura montigena	NA	48	0.373458566	NA	NA	NA	NA	29.01445611	30.47903764	41.22676234	10.47817135	-0.002686027	-0.005714998	-0.00356604	0.030631827	-0.007207166	Myers and Donnelly 2008
Arthrosaura reticulata	27	71	0.934855067	NA	NA	NA	NA	27	29.08096337	40.53634903	9.196076472	-0.002187957	-0.002100604	-0.005117625	0.02767019	-0.007942258	Duellman and Mendelson 1995, Avila-Pires 1995, Martins 1991, Duellman 1978, Zimmerman and Rodrigues 1990, Duellman 1990, Dixon and Soini 1986, Vitt and Zani 1998, Bartlett and Bartlett 2003, Vitt and Zani 1996b, Huey et al. 2001, Bartlett and Bartlett 2003, Avila-Pires et al. 2010, Mott et al. 2011, Gasc 1990, Whitworth and Beirne 2011, Torres-Carvajal and Salazar-Valenzuela 2013, Vitt et al. 200…
Arthrosaura synaptolepis	NA	51	0.460396721	NA	NA	NA	NA	29.04626082	30.46425978	41.23158901	10.2871356	-0.002397056	0.013874527	-0.005771033	0.027642849	-0.007641518	Donnely et al. 1992
Arthrosaura versteegii	NA	71	0.934855067	NA	NA	NA	NA	29.2198326	30.38361074	41.25793015	9.244572593	-0.002601451	0.006496435	-0.005735809	0.028842848	-0.007364063	Hoogmoed 1973, Donnely et al. 1992, Gorzula and Senaris 1999, Hoogmoed and Avila-Pires 1992
Aspidoscelis angusticeps	39.4	115	1.661770283	NA	NA	NA	NA	39.4	36.96467756	46.24174549	10.85692616	-0.001689936	0.027808051	-0.007383977	0.022256729	-0.009721326	Campbell 1999, Stafford and Meyer 2000, Lee 2000, Kohler 2003, Duellman 1965, de la Vega-Perez et al. 2013
Aspidoscelis burti	43	140	1.927458191	NA	NA	NA	NA	43	38.97503865	47.39512089	10.34963499	-0.000637321	-0.121150835	-0.001022612	0.018429706	-0.008252719	Stebbins 2003, Degenhardt et al. 1996, Goldberg 1987, Jones and Lovich 2009, Brennan and Holycross 2009, Rorabaugh and Lemos-Espinal 2016
Aspidoscelis calidipes	40.4	79	1.154620254	NA	NA	NA	NA	40.4	37.7465799	46.59895945	11.99722507	NA	NA	NA	NA	NA	Walker 1981, Duellman 1961, Duellman 1965, Ramirez Bautista and Arizmendi 2004, Guizado-Rodriguez et al. 2014
Aspidoscelis carmenensis	NA	70	0.991254904	NA	NA	NA	NA	NA	NA	NA	NA	-0.000712281	-0.165234394	-0.00071384	0.019628107	-0.008065065	Grismer 2002
Aspidoscelis ceralbensis	40.7	95	1.403720412	NA	NA	NA	NA	40.7	37.8268079	46.68068502	11.45442172	NA	NA	NA	NA	NA	Grismer 2002, Case 1982, Van Denburgh 1922, Walker et al. 1966, Sinervo et al. 2010, Woolrich-Pina et al. 2011, Soule 1963, Brattstrom 1965
Aspidoscelis communis	36.2	152	2.038533559	34.4	NA	NA	NA	36.2	34.4	45.04871158	10.00969229	-0.00109903	0.009391168	-0.00930751	0.014354593	-0.013694141	Fitch 1985, Ramirez-Bautista and Pardo-De La Rosa 2002, Casas-Andreu and Gurrola-Hidalgo 1993, Dunham et al. 1988, Duellman 1961, Duellman 1965, Woolrich-Pina et al. 2011, Mata-Silva et al. 2010, Ramirez Bautista and Arizmendi 2004, Mesquita et al. 2016, Cruz-Saenz et al. 2008, Siliceo-Cantero et al. 2017
Aspidoscelis costatus	NA	132	1.847984926	NA	NA	NA	NA	NA	NA	NA	NA	-0.00109903	0.009391168	-0.00930751	0.014354593	-0.013694141	Fitch 1970, Duellman 1961, Hardy and McDiarmid 1969, Lemos-Espinal and Smith 2007b, Duellman 1965, Zaldivar-Rae et al. 2008, Mendez de la Cruz et al. 2003, Walker et al. 2005, Cruz-Elizalde et al. 2014, Lemos-Espinal et al. 2013, Rorabaugh and Lemos-Espinal 2016, Mundo-Hernandez et al. 2017
Aspidoscelis cozumelus	38	83	1.221332867	NA	NA	NA	NA	NA	NA	NA	NA	NA	NA	NA	NA	NA	Campbell 1999, Stafford and Meyer 2000, Lee 2000, Kohler 2003, Manriquez-Moran et al. 2008, Lopez and Gonzalez 1997, Walker 2012, de la Vega-Perez et al. 2013
Aspidoscelis danheimae	NA	66	0.91178164	NA	NA	NA	NA	38.71662936	36.85215054	46.06715699	12.49599728	-0.000712281	-0.165234394	-0.00071384	0.019628107	-0.008065065	Grismer 1999, Grismer 2002
Aspidoscelis deppii	42.5	93	1.37498197	NA	NA	NA	NA	NA	NA	NA	NA	-0.001689936	0.027808051	-0.007383977	0.022256729	-0.009721326	Clobert et al. 1998, Fitch 1970, 1973, Mata-Silva and Ramirez-Bautista 2005, Vitt et al. 1993, Savage 2002, Lee 2000, Vitt and de Carvalho 1992, Vitt and Breitenbach 1993, Pianka and Vitt 2003, Kohler et al. 2006, Duellman 1961, Cooper et al. 2001, Rand 1957, Kohler 2008, Echternacht 1983, Davis and Dixon 1961, Davis and Smith 1953, Kohler 2005, Duellman 1965, Kennedy 1968, Woolrich-Pina et al. 2…
Aspidoscelis espiritensis	NA	60	0.783050389	NA	NA	NA	NA	NA	NA	NA	NA	NA	NA	NA	NA	NA	Grismer 2002
Aspidoscelis exsanguis	40.4	107	1.564383549	NA	NA	NA	NA	40.4	37.58896062	46.57298079	11.09354644	-0.000816065	-0.125058126	-0.002567034	0.019890844	-0.01028775	Tinkle et al. 1970, Dunham and Miles 1985, Fitch 1970, Conant and Collins 1998, Stebbins 2003, Vitt and Breitenbach 1993, Schall 1993, Degenhardt et al. 1996, Winne and Beck 2004, Medica 1967, Rogner 1997b, Eifler and Passek 2000, Dunham et al. 1988, Vitt and Price 1982, Schall 1978, Stuart 1991, Lemos-Espinal and Smith 2007b, Sinervo et al. 2010, Kohler 2005, Jones and Lovich 2009, Woolrich-Pina…
Aspidoscelis franciscensis	NA	64	0.870219719	NA	NA	NA	NA	NA	NA	NA	NA	NA	NA	NA	NA	NA	Grismer 2002
Aspidoscelis gularis	41	115	1.661770283	NA	NA	NA	NA	41	35.73227001	46.24516857	11.10654964	-0.00099857	-0.0885083	-0.003551426	0.022839783	-0.011277668	Fitch 1985, Perry and Garland 2002, Conant and Collins 1998, Stebbins 2003, Vitt and Breitenbach 1993, Schall 1993, Degenhardt et al. 1996, Smith 1946, Rogner 1997b, Eifler and Passek 2000, McCranie and Wilson 2001, Vitt and Price 1982, Vitt and Price 1982, Ballinger and Schrank 1972, Lemos-Espinal and Smith 2007, Schall 1978, Lemos-Espinal and Smith 2007b, Sinervo et al. 2010, Kohler 2005, Jones…
Aspidoscelis guttatus	40.4	145	1.974854487	NA	NA	NA	NA	NA	NA	NA	NA	-0.000969506	0.099148063	-0.015053792	0.005949384	-0.013197224	Fitch 1970, Mata-Silva and Ramirez-Bautista 2005, Kohler 2003, Greene 1982, Davis and Dixon 1961, Kennedy 1968, Woolrich-Pina et al. 2011
Aspidoscelis hyperythrus	39.9	72.2	1.033050684	NA	NA	NA	NA	NA	NA	NA	NA	-0.000712281	-0.165234394	-0.00071384	0.019628107	-0.008065065	Tinkle et al. 1970, Dunham and Miles 1985, Radtkey et al. 1997, Walker 1981, Perry and Garland 2002, Stebbins 2003, Vitt and Breitenbach 1993, Case 2002, Smith 1946, Linsdale 1932, Van Denburgh 1922, Nagy et al. 1999, Dunham et al. 1988, Brown and Nagy 2007, Warne and Charnov 2008, Sinervo et al. 2010, Kohler 2005, Jones and Lovich 2009, Case 1975, Woolrich-Pina et al. 2011, Soule 1963, Brattstro…
Aspidoscelis inornatus	40.2	86	1.269290183	NA	NA	NA	NA	NA	NA	NA	NA	-0.000866497	-0.191379513	0.000960348	0.025447296	-0.009417318	Tinkle et al. 1970, Clobert et al. 1998, Dunham and Miles 1985, Congdon et al. 1978, Vitt et al. 1978, Walker 1981, Fitch 1985, Conant and Collins 1998, Stebbins 2003, Vitt and Breitenbach 1993, Schall 1993, Degenhardt et al. 1996, Greene 1982, Smith 1946, Winne and Beck 2004, Medica 1967, Milstead 1951, Rogner 1997b, Eifler and Passek 2000, Van Denburgh 1922, Dunham et al. 1988, Vitt and Price 1…
Aspidoscelis labialis	37.2	63	0.848949109	NA	NA	NA	NA	37.2	35.98632767	45.57814339	12.60143268	-0.000712281	-0.165234394	-0.00071384	0.019628107	-0.008065065	Walker 1981, Grismer 2002, Goldberg 2012, Ramirez Bautista and Arizmendi 2004
Aspidoscelis laredoensis	39.6	90	1.330694204	34.6	NA	NA	NA	39.6	34.6	45.70683258	11.84941858	-0.000998361	-0.146292733	0.00016875	0.027125783	-0.009537618	Conant and Collins 1998, Paulissen 1994, Paulissen et al. 1989, Uetz 2006, McKinney et al. 1973, Walker 1987, Kohler 2005, Siever and Paulissen 1996, Woolrich-Pina et al. 2011, Trauth et al. 2013, Paulissen 2000, Walker et al. 2015, Hibbitts and Hibbitts 2015
Aspidoscelis lineattissimus	38.4	112	1.626068051	NA	NA	NA	NA	NA	NA	NA	NA	NA	NA	NA	NA	NA	Fitch 1985, Ramirez-Bautista et al. 2000, Casas-Andreu and Gurrola-Hidalgo 1993, Duellman 1961, Kohler 2005, Duellman 1965, Rodriguez and Casas-Andreu 2011, Navarro-Garcia et al. 2008, Mata-Silva et al. 2010, Ramirez Bautista and Arizmendi 2004, Cupul-Magana et al. 2016, Siliceo-Cantero et al. 2017
Aspidoscelis marmoratus	40	107	1.564383549	NA	NA	NA	NA	NA	NA	NA	NA	-0.000866497	-0.191379513	0.000960348	0.025447296	-0.009417318	Conant and Collins 1998, Lemos-Espinal and Smith 2007, Lemos-Espinal and Smith 2007b, Jones and Lovich 2009, Mata-Silva et al. 2010, Punzo 2001, Mata-Silva et al. 2013, Hibbitts and Hibbitts 2015, Gadsden and Castaneda 2013
Aspidoscelis maslini	38.6	74.2	1.069956145	NA	NA	NA	NA	38.6	36.72286652	46.01921719	12.1446164	-0.001689936	0.027808051	-0.007383977	0.022256729	-0.009721326	Fritts 1969, de la Vega-Perez et al. 2013
Aspidoscelis maximus	NA	137	1.898200964	NA	NA	NA	NA	NA	NA	NA	NA	NA	NA	NA	NA	NA	Van Denburgh 1922, Asplund 1967, Grismer 2002
Aspidoscelis mexicanus	NA	93	1.37498197	NA	NA	NA	NA	NA	NA	NA	NA	-0.000969506	0.099148063	-0.015053792	0.005949384	-0.013197224	Ramirez Bautista and Arizmendi 2004
Aspidoscelis motaguae	NA	145	1.974854487	NA	NA	NA	NA	39.10553484	36.67144806	46.12617705	10.16002735	-0.001329721	0.063478057	-0.011218885	0.014103056	-0.011459275	Kohler 2003, Kohler et al. 2006, Van Wilgen and Richardson 2012, Kohler et al. 2013
Aspidoscelis neomexicanus	39.4	86	1.269290183	NA	NA	NA	NA	NA	NA	NA	NA	-0.000816065	-0.125058126	-0.002567034	0.019890844	-0.01028775	Tinkle et al. 1970, Dunham and Miles 1985, Conant and Collins 1998, Stebbins 2003, Vitt and Breitenbach 1993, Degenhardt et al. 1996, Medica 1967, Dunham et al. 1988, Warne and Charnov 2008, Vitt and Breitenbach 1993, Manriquez-Moran et al. 2008, Turner 1977, Jones and Lovich 2009, Woolrich-Pina et al. 2011, Brennan and Holycross 2009, Ramirez Bautista and Arizmendi 2004, Mesquita et al. 2016, Hi…
Aspidoscelis neotesselatus	NA	107	1.564383549	NA	NA	NA	NA	NA	NA	NA	NA	-0.00073231	-0.047442627	-0.006565365	0.017641867	-0.014273908	Stebbins 2003, Walker et al. 1997, Jones and Lovich 2009, Taylor et al. 1999, Young 2011
Aspidoscelis opatae	NA	71	1.010413465	NA	NA	NA	NA	38.75271198	36.83538498	46.07263287	12.27926615	-0.001296485	-0.10973074	-0.002826247	0.021393541	-0.010698766	Wright 1967, Rorabaugh and Lemos-Espinal 2016
Aspidoscelis pai	NA	85	1.253492859	39.3	NA	NA	NA	40.65123722	39.3	47.01796866	11.64189971	-0.000687084	-0.022346095	-0.006074944	0.013591772	-0.011725303	Wright and Lowe 1993, Jones and Lovich 2009, Brennan and Holycross 2009, Walker et al. 2012, Sullivan et al. 2013
Aspidoscelis parvisocius	40.1	79	1.154620254	NA	NA	NA	NA	NA	NA	NA	NA	-0.000969506	0.099148063	-0.015053792	0.005949384	-0.013197224	Walker 1981, Fitch 1985, Vitt and de Carvalho 1992, Vitt and Breitenbach 1993, Kohler 2005, Maslin and Walker 1973, Ramirez Bautista and Arizmendi 2004
Aspidoscelis pictus	NA	71	1.010413465	NA	NA	NA	NA	NA	NA	NA	NA	-0.000712281	-0.165234394	-0.00071384	0.019628107	-0.008065065	Burt 1931, Grismer 2002
Aspidoscelis rodecki	39.2	76	1.102330272	NA	NA	NA	NA	39.2	37.06250692	46.21220133	12.0863276	NA	NA	NA	NA	NA	Lee 2000, Kohler 2003, Fritts 1969, Walker 2012, de la Vega-Perez et al. 2013, Mendez de la Cruz et al. 2003
Aspidoscelis sackii	38.3	153	2.04739035	36.8	51	NA	NA	38.3	36.8	51	13.88342809	-0.000969506	0.099148063	-0.015053792	0.005949384	-0.013197224	Fitch 1985, Vitt and de Carvalho 1992, Vitt and Breitenbach 1993, Milstead 1951, Davis and Dixon 1961, Davis and Smith 1952, Davis and Smith 1953, Kohler 2005
Aspidoscelis scalaris	37.6	125	1.77439014	NA	NA	NA	NA	37.6	34.54039815	45.33428322	10.70019872	-0.001060775	-0.108281558	-0.003208168	0.021064803	-0.011179007	Clobert et al. 1998, Duellman 1965, Jones and Lovich 2009, Castanet 1994, Barbault and Maury 1981, Shenbrot et al. 1991
Aspidoscelis sexlineatus	41	91	1.34561873	NA	NA	NA	NA	NA	NA	NA	NA	-0.00103004	0.08826729	-0.014349249	0.01213177	-0.01590506	Tinkle et al. 1970, Clobert et al. 1998, Dunham and Miles 1985, Fitch 1970, Conant and Collins 1998, Stebbins 2003, Vitt and Breitenbach 1993, Pianka and Vitt 2003, Degenhardt et al. 1996, Smith 1946, Rogner 1997b, Dunham et al. 1988, Clusella-Trullas et al. 2008, Warne and Charnov 2008, Cooper et al. 2001, Sinervo et al. 2010, Kohler 2005, Jones and Lovich 2009, Jensen et al. 2008, Taylor et al.…
Aspidoscelis sonorae	NA	93	1.37498197	NA	NA	NA	NA	38.88608261	36.77341515	46.09287311	11.47817235	-0.001076764	-0.113537438	-0.002225035	0.020405596	-0.009883417	Congdon et al. 1978, Vitt et al. 1978, Stebbins 2003, Vitt and Breitenbach 1993, Degenhardt et al. 1996, Routman and Hulse 1984, Case 1983, Eifler and Passek 2000, Dunham et al. 1988, Vitt and Price 1982, Cooper et al. 2001, Lemos-Espinal and Smith 2007b, Kohler 2005, Jones and Lovich 2009, Brennan and Holycross 2009, Mesquita et al. 2016, Rorabaugh and Lemos-Espinal 2016
Aspidoscelis stictogrammus	NA	140	1.927458191	NA	NA	NA	NA	NA	NA	NA	NA	-0.000637321	-0.121150835	-0.001022612	0.018429706	-0.008252719	Stebbins 2003, Rorabaugh and Lemos-Espinal 2016
Aspidoscelis tigris	41.3	137	1.898200964	38.5	45.1	10.5	80.1	41.3	38.5	45.1	10.5	-0.000764438	-0.097536522	-0.003442206	0.018032515	-0.010972839	Tinkle et al. 1970, Clobert et al. 1998, Dunham and Miles 1985, Fitch 1970, 1985, Radtkey et al. 1997, Anderson and Vitt 1990, Walker 1981, Perry and Garland 2002, Stebbins 2003, Cox et al. 2003, Grismer 2002, Ortega-Rubio et al. 1995, Pianka 1986, Vitt and Breitenbach 1993, Vitt and Breitenbach 1993, Schall 1993, Pianka and Vitt 2003, Case 2002, Degenhardt et al. 1996, Greene 1982, Winne and Bec…
Aspidoscelis uniparens	41	86	1.269290183	39.8	NA	NA	NA	41	39.8	47.20205911	11.58488066	-0.000816065	-0.125058126	-0.002567034	0.019890844	-0.01028775	Congdon et al. 1978, Vitt et al. 1978, Perry and Garland 2002, Conant and Collins 1998, Stebbins 2003, Vitt and Breitenbach 1993, Cuellar 1993, Degenhardt et al. 1996, Eifler and Passek 2000, Dunham et al. 1988, Vitt and Price 1982, Warne and Charnov 2008, Cooper et al. 2001, Radder et al. 2008, Cuellar 1984, Lemos-Espinal and Smith 2007b, Jones and Lovich 2009, Woolrich-Pina et al. 2011, Brennan…
Aspidoscelis velox	38.7	89	1.315602921	NA	NA	NA	NA	38.7	36.68705843	46.03614949	11.60505967	-0.000780747	-0.011779852	-0.006903494	0.012864377	-0.014056389	Fitch 1970, Stebbins 2003, Degenhardt et al. 1996, Bowker et al. 1986, Vitt and Price 1982, Radder et al. 2008, Stuart 1998, Jones and Lovich 2009, Woolrich-Pina et al. 2011, Brennan and Holycross 2009, Young 2011, Storm and Leonard 1995
Asymblepharus himalayanus	31	70.5	0.842802659	NA	NA	NA	NA	31	30.7073993	41.33580395	7.168978084	-0.000925241	0.209755719	-0.014353728	0.004152852	-0.014151818	Fitch 1970, Minton 1966, Ouboter 1986, Masroor 2012, Nanhoe and Ouboter 1987, Kastle et al. 2013
Asymblepharus sikimmensis	31	55.8	0.514881828	NA	NA	NA	NA	31	30.83353711	41.35659387	7.892164008	-0.002099269	-0.121932463	-0.005724191	0.023859912	-0.010261265	Tikader and Sharma 1992, Inger and Colwell 1977, Schleich and Kastle 2002, Daniel 1983, Shrestha 2001, Ouboter 1986, Das 2002, Aryal et al.2010, Nanhoe and Ouboter 1987, Kastle et al. 2013, Agarwal et al. 2010, IUCN Bangladesh 2015
Aurivela longicauda	36.7	70	0.991254904	NA	NA	NA	NA	36.7	34.99311269	44.43671831	11.2596068	-0.001085517	-0.105099769	-0.00350442	0.018544147	-0.010325999	Cei 1986, Cei 1993, Scolaro 2005
Barisia ciliaris	NA	158	1.886326663	NA	NA	NA	NA	26.36945737	28.66450976	39.82488174	4.8301216	-0.00109903	0.009391168	-0.00930751	0.014354593	-0.013694141	Lemos-Espinal and Dixon 2013, Contreras-Lozano et al. 2010, Lemos-Espinal et al. 2013, Lemos-Espinal et al. 2015
Barisia imbricata	26.6	158.3	1.889193584	NA	NA	NA	NA	26.6	28.79869454	39.89964041	4.828835592	-0.001437968	-0.042506093	-0.006196485	0.018625415	-0.012401962	Fitch 1970, Wiens and Slingluff 2001, Zaldivar-Riveron and de Oca 2002, Guillette and Smith 1982, Greene et al. 2006, McCranie and Wilson 2001, Duellman 1961, Martinez-Torres et al. 2003, Radder et al. 2008, Guillette and Casas-Andreu 1987, Cree and Guillette 1995, Lemos-Espinal and Smith 2007, Davis and Smith 1953, Lemos-Espinal and Smith 2007b, Duellman 1965, Dixon and Lemos-Espinal 2010, Dashe…
Barisia jonesi	NA	132.6	1.621451464	NA	NA	NA	NA	NA	NA	NA	NA	NA	NA	NA	NA	NA	Guillette and Smith 1982
Barisia planifrons	NA	122	1.495532211	NA	NA	NA	NA	NA	NA	NA	NA	-0.000969506	0.099148063	-0.015053792	0.005949384	-0.013197224	Kerster and Smith 1955
Bassiana duperreyi	32	80	1.020077568	28.6	43.5	3	NA	32	28.6	43.5	3	-0.000673191	0.152163903	-0.020902399	0.003782348	-0.01803411	Cogger 2000, Shine and Greer 1991, Wilson and Swan 2003, Greer 1989, Greer 2005, Radder and Shine 2007, Shine and Thomas 2005, Wilson and Swan 2008, James and Shine 1988, Radder et al. 2008, Uller et al. 2009, Fischer and Lindenmayer 2005, Kohler 2005, Wilson and Swan 2011, Michael and Lindenmayer 2010, Greer 1982, Swanson 2007, Hutchinson et al. 2001, Brown 2012, Swan et al. 2017
Bassiana platynota	NA	80	1.020077568	NA	43.6	NA	NA	31.39814688	29.18367886	43.6	3.752483613	-0.000813832	0.121061076	-0.019207521	0.004523517	-0.01617696	Cogger 2000, Shine and Greer 1991, Wilson and Swan 2003, Greer 1989, Greer 2005, James and Shine 1988, Fischer and Lindenmayer 2005, Kohler 2005, Wilson and Swan 2011, Michael and Lindenmayer 2010, Greer 1982, Swanson 2007, Wilson 2005, Swan et al. 2017
Bassiana trilineata	28.3	72	0.872326631	NA	NA	NA	NA	28.3	27.47773756	42.13484957	3.826756492	-0.00097984	-0.176535019	-0.001586709	0.023024513	-0.012161373	Cogger 2000, Shine and Greer 1991, Wilson and Swan 2003, Greer 1989, Greer 2005, Shine 1983, Wilson and Swan 2008, James and Shine 1988, Taylor 1985, Kohler 2005, Bush et al. 2010, Wilson and Swan 2011, Heatwole and Taylor 1987, Greer 1982, Bush et al. 2007
Brachymeles schadenbergi	NA	119	1.576941138	NA	NA	NA	NA	30.31492076	30.63915775	41.43968659	7.233238685	NA	NA	NA	NA	NA	Brown and Alcala 1980, Brown 1956, Alcala 1986, Siler and Brown 2010
Brachyseps macrocercus	NA	110	1.46665698	NA	NA	NA	NA	NA	NA	NA	NA	-0.001338412	-0.026810081	-0.00966697	0.019407206	-0.011664869	Andreone and Greer 2002, Glaw and Vences 1994, Raselimanana and Rakotomalala 2004, Ramanamanjato 2000, Glaw and Vences 2007
Brasiliscincus agilis	34.5	96	1.275753811	NA	NA	NA	NA	34.5	33.0209859	42.67503632	9.122891468	-0.00153708	-0.005745833	-0.009088498	0.018527848	-0.011831368	Huang 2006b, Vrcibradic and Rocha 1996, Rocha et al. 2004, Rocha et al. 2002, Vrcibradic and Rocha 1996, Miralles et al. 2009, Sinervo et al. 2010, Ramirez-Pinilla et al. 2002, Rocha et al. 2009, Vrcibradic and Rocha 2011, Ribeiro et al. 2014, Mesquita et al. 2016, Rocha and van Sluys 2006
Brasiliscincus heathi	34.6	92	1.216070894	NA	NA	NA	NA	34.6	33.10262572	42.71132627	9.256698905	-0.00212404	-0.083365454	-0.00035997	0.031792621	-0.008622941	Fitch 1985, Cox et al. 2003, Pianka and Vitt 2003, Mesquita et al. 2006b, Cree 1994, Dunham et al. 1988, Rodrigues 1996, Vitt and Price 1982, Warne and Charnov 2008, Blackburn and Vitt 1992, Vitt 1995, Schmidt and Inger 1951, Blackburn et al. 1984, Vitt 1986, Fitch 1982, Vanzolini et al. 1980, Sinervo et al. 2010, Ramirez-Pinilla et al. 2002, Rocha and Rodrigues 2005, Cooper and Whiting 2000, Vrc…
Brookesia ambreensis	NA	55	0.667172008	NA	NA	NA	NA	30.88905921	31.470467	41.77418587	9.364355478	NA	NA	NA	NA	NA	Carpenter and Robson 2005, Raxworthy and Nussbaum 1995, Raselimanana and Rakotomalala 2004, Glaw and Vences 2007
Brookesia antakarana	NA	58	0.728987023	NA	NA	NA	NA	30.91167309	31.4599596	41.77761773	9.228524696	NA	NA	NA	NA	NA	Carpenter and Robson 2005, Raxworthy and Nussbaum 1995, Raselimanana and Rakotomalala 2004, Glaw and Vences 2007, Glaw et al. 2012
Brookesia bekolosy	NA	34	0.107363498	NA	NA	NA	NA	30.68426365	31.56562397	41.74310622	10.59446482	NA	NA	NA	NA	NA	Carpenter and Robson 2005, Raxworthy and Nussbaum 1995, Raselimanana and Rakotomalala 2004, Glaw and Vences 2007, Necas 1999
Brookesia bonsi	NA	38	0.236820039	NA	NA	NA	NA	30.73162293	31.54361878	41.75029343	10.31000023	-0.001803796	-0.020897368	-0.009481541	0.019605217	-0.01116323	Glaw and Vences 1994, Henkel and Schmidt 2000, Bauer 2004, Glaw and Vences 2007, Necas 1999
Brookesia brunoi	NA	42.8	0.375269301	NA	NA	NA	NA	30.78227202	31.52008499	41.75797991	10.00577525	-0.001338412	-0.026810081	-0.00966697	0.019407206	-0.011664869	Crottini et al. 2012
Brookesia brygooi	NA	52	0.601888961	NA	NA	NA	NA	30.86517662	31.48156389	41.77056146	9.507806827	-0.001571104	-0.023853724	-0.009574256	0.019506211	-0.011414049	Carpenter and Robson 2005, Raselimanana and Rakotomalala 2004, Glaw and Vences 2007, Glaw and Vences 2007
Brookesia confidens	NA	22.6	-0.367989383	NA	NA	NA	NA	30.51036462	31.64642506	41.71671541	11.63899346	NA	NA	NA	NA	NA	Glaw et al. 2012
Brookesia decaryi	NA	53	0.624059331	NA	NA	NA	NA	30.87328724	31.47779535	41.77179232	9.459090206	-0.001803796	-0.020897368	-0.009481541	0.019605217	-0.01116323	Glaw and Vences 1994, Henkel and Schmidt 2000, Raselimanana and Rakotomalala 2004, Necas 1999, Brygoo 1978, Glaw and Vences 2007
Brookesia dentata	NA	23	-0.347569399	NA	NA	NA	NA	30.51783489	31.64295404	41.7178491	11.5941231	-0.001803796	-0.020897368	-0.009481541	0.019605217	-0.01116323	Glaw and Vences 1994, Henkel and Schmidt 2000, Raselimanana and Rakotomalala 2004, Glaw and Vences 2007, Necas 1999
Brookesia desperata	NA	30	-0.038315037	NA	NA	NA	NA	30.63096986	31.59038659	41.73501839	10.91457523	NA	NA	NA	NA	NA	Glaw et al. 2012
Brookesia griveaudi	NA	64	0.84356233	NA	NA	NA	NA	30.95358834	31.44048395	41.78397877	8.976759755	-0.001803796	-0.020897368	-0.009481541	0.019605217	-0.01116323	Glaw and Vences 1994, Raselimanana and Rakotomalala 2004, Brygoo 1978, Glaw and Vences 2007
Brookesia lambertoni	NA	44	0.407453173	NA	NA	NA	NA	30.79404589	31.51461434	41.7597667	9.935055209	-0.001803796	-0.020897368	-0.009481541	0.019605217	-0.01116323	Raselimanana and Rakotomalala 2004, Necas 1999
Brookesia minima	NA	25	-0.250520777	NA	NA	NA	NA	30.55333833	31.62645759	41.72323707	11.38087086	NA	NA	NA	NA	NA	Glaw and Vences 1994, Carpenter and Robson 2005, Henkel and Schmidt 2000, Raselimanana and Rakotomalala 2004, Necas 1999, Raxworthy 1991, Rogner 1997a, Brygoo 1978, Glaw and Vences 2007, Kohler 2005, Schleich et al. 1996, Schmidt and Simon 1988
Brookesia peyrierasi	NA	27.4	-0.143828492	NA	NA	NA	NA	30.59236972	31.6083219	41.72916045	11.14642788	-0.001803796	-0.020897368	-0.009481541	0.019605217	-0.01116323	Glaw and Vences 1994, Henkel and Schmidt 2000, Raselimanana and Rakotomalala 2004, Necas 1999, Glaw and Vences 2007, Necas 1999
Brookesia stumpffi	NA	57	0.708744613	NA	NA	NA	NA	30.90426778	31.46340043	41.77649391	9.273004865	-0.001803796	-0.020897368	-0.009481541	0.019605217	-0.01116323	Glaw and Vences 1994, Carpenter and Robson 2005, Henkel and Schmidt 2000, Raselimanana and Rakotomalala 2004, LeBerre et al. 2000, Necas 1999, Raxworthy 1991, Rogner 1997a, Glaw and Vences 2007, Kohler 2005, Lowin 2012, Miller 2017
Brookesia tristis	NA	23.8	-0.307773755	NA	NA	NA	NA	30.53239339	31.63618953	41.72005848	11.50667714	NA	NA	NA	NA	NA	Glaw et al. 2012, Measey et al. 2014
Brookesia tuberculata	NA	21.7	-0.415287913	NA	NA	NA	NA	30.49306133	31.65446492	41.71408947	11.74292608	NA	NA	NA	NA	NA	Glaw and Vences 1994, Raselimanana and Rakotomalala 2004, Glaw and Vences 2007
Brookesia valerieae	NA	53	0.624059331	NA	NA	NA	NA	30.87328724	31.47779535	41.77179232	9.459090206	NA	NA	NA	NA	NA	Glaw and Vences 1994, Raselimanana and Rakotomalala 2004, Raxworthy 1991, Glaw and Vences 2007, Necas 1999
Bufoniceps laungwalaensis	NA	69	1.023626427	NA	NA	NA	NA	35.99004934	36.18131527	44.75161942	11.19943771	-0.00027275	-0.08435922	0.001849608	0.013921483	-0.004009764	Tikader and Sharma 1992, Das 2002, Macey et al. 2006, Arnold 1992, Joshi and Das 2015, Agarwal et al. 2015, Das and Das 2017
Caledoniscincus aquilonius	NA	49	0.332643142	NA	NA	NA	NA	29.61610349	29.56801452	40.75385534	6.448713027	NA	NA	NA	NA	NA	Bauer and Sadlier 2000, Sadlier et al. 1999
Caledoniscincus atropunctatus	NA	55	0.494631124	NA	NA	NA	NA	29.67536379	29.54047959	40.76284864	6.092764649	NA	NA	NA	NA	NA	Bauer and Sadlier 2000, Bauer and Vindum 1990, Ineich 2011, Bauer and Sadlier 1994, Zug 2013, Sadlier et al. 2013, Sadlier 1987
Caledoniscincus auratus	NA	51	0.388744099	NA	NA	NA	NA	29.63662699	29.5584784	40.75696997	6.325438176	NA	NA	NA	NA	NA	Bauer and Sadlier 2000, Sadlier et al. 1999
Caledoniscincus austrocaledonicus	NA	57	0.544719909	NA	NA	NA	NA	29.69368785	29.53196544	40.76562949	5.982700795	NA	NA	NA	NA	NA	Bauer and DeVaney 1987, Bauer and Sadlier 2000, Sadlier 1987
Caledoniscincus chazeaui	NA	43	0.149469643	NA	NA	NA	NA	29.54909287	29.59915058	40.74368585	6.851213935	NA	NA	NA	NA	NA	Bauer and Sadlier 2000, Sadlier et al. 1999
Caledoniscincus constellatus	NA	57	0.544719909	NA	NA	NA	NA	29.69368785	29.53196544	40.76562949	5.982700795	NA	NA	NA	NA	NA	Sadlier et al. 2012
Caledoniscincus festivus	NA	72	0.872326631	NA	NA	NA	NA	29.81353669	29.47627843	40.78381767	5.262825903	NA	NA	NA	NA	NA	Bauer and Sadlier 2000, Shea et al. 2009, Sadlier 1987
Caledoniscincus haplorhinus	NA	55	0.494631124	NA	NA	NA	NA	29.67536379	29.54047959	40.76284864	6.092764649	NA	NA	NA	NA	NA	Bauer and Sadlier 2000, Sadlier et al. 1999
Caledoniscincus orestes	NA	65	0.728897229	NA	NA	NA	NA	29.7610657	29.50065874	40.77585471	5.577994118	NA	NA	NA	NA	NA	Bauer and Sadlier 2000, Shea et al. 2009, Sadlier 1987
Caledoniscincus pelletieri	NA	58.5	0.581146292	NA	NA	NA	NA	29.70701376	29.52577363	40.76765182	5.902658365	NA	NA	NA	NA	NA	Sadlier et al. 2014
Caledoniscincus renevieri	NA	51	0.388744099	NA	NA	NA	NA	29.63662699	29.5584784	40.75696997	6.325438176	NA	NA	NA	NA	NA	Bauer and Sadlier 2000, Sadlier et al. 1999
Caledoniscincus terma	NA	50	0.360974144	NA	NA	NA	NA	29.62646787	29.56319878	40.75542823	6.386459186	NA	NA	NA	NA	NA	Bauer and Sadlier 2000, Sadlier et al. 1999
Callisaurus draconoides	41.5	109	1.599190735	38.1	NA	NA	82.85	41.5	38.1	45.75213943	11.24553112	-0.00070602	-0.117649973	-0.002564731	0.018284687	-0.00963262	Dunham and Miles 1985, Fitch 1970, 1985, Huey and Pianka 1981, Melville et al. 2006, Cox et al. 2003, Stebbins 2003, Grismer 2002, Ortega-Rubio et al. 1995, Pianka 1986, Degenhardt et al. 1996, Pianka and Vitt 2003, Smith 1946, Linsdale 1932, Rogner 1997a, Judd 1976, Van Denburgh 1922, Nagy et al. 1999, Dunham et al. 1988, Maisano 2001, Clusella-Trullas et al. 2008, Brown and Nagy 2007, Warne and…
Callopistes flavipunctatus	NA	325	3.064957253	NA	NA	NA	NA	33.9756917	32.3550914	42.66882794	4.650814629	-0.001137635	0.111196329	-0.014642869	0.011299116	-0.013550519	Greene 1982, Martins 2006, Crespo and Koch 2015, Lemm and Cueva 2016, Koch 2013
Callopistes maculatus	39	173	2.213323381	NA	NA	NA	NA	39	35.63105669	44.35602781	6.638745038	-0.00107925	0.12418651	-0.014110791	0.008514832	-0.01339047	Zug et al. 2001, Greene 1982, Donoso-Barros 1966, Rogner 1997b, Jaksic et al. 1982, Sinervo et al. 2010, Ibarguengoytia 2008, Vidal and Labra 2008, Labra et al. 2008, Muchlinski et al. 1995, Faundez 2012, Castro et al. 1991, Demangel 2016, Demangel 2016b
Calotes minor	NA	96.8	1.480142984	NA	NA	NA	NA	NA	NA	NA	NA	-0.000557628	-0.088785456	0.002970823	0.018850395	-0.003903089	Smith 1935, Daniel 1983, Tikader and Sharma 1992, Boulenger 1890, Das 2002, Ahmed 2009, IUCN, Deepak et al. 2016, IUCN Bangladesh 2015
Caparaonia itaiquara	NA	60	0.693455429	NA	NA	NA	NA	30.38412005	31.15969726	41.6516992	9.802383391	-0.001433741	-0.002931513	-0.010317008	0.017629636	-0.011870423	Rodrigues et al. 2009
Carinascincus coventryi	27	54	0.46889945	30.1	40.2	NA	NA	NA	NA	NA	NA	-0.000813832	0.121061076	-0.019207521	0.004523517	-0.01617696	Cogger 2000, Shine and Greer 1991, Wilson and Swan 2003, Greer 2005, Cree 1994, Melville and Swain 2000, Vitt and Price 1982, Wilson and Swan 2008, Fischer and Lindenmayer 2005, Michael and Lindenmayer 2010, Greer 1982, Murphy et al. 2006, Melville and Swain 1999, Swan et al. 2017
Carlia ailanpalai	NA	67	0.771395538	NA	NA	NA	NA	30.73627827	30.09000417	41.06841082	4.546633188	NA	NA	NA	NA	NA	Rodda and Dean-Bradley 2001, Zug 2013, Goldberg 2011, Tadevosyan and Lardner 2016, Buden and Taborosi 2016, Kerr 2013
Carlia amax	NA	41	0.082679073	NA	NA	NA	NA	30.48432412	30.20707308	41.03017442	6.060001679	-0.00161345	-0.154813531	0.003924584	0.033590744	-0.006303651	Cogger 2000, Wilson and Swan 2003, Greer 1989, Greer 2005, Wilson and Swan 2008, James and Shine 1988, Horner 1999, Kohler 2005, James 1984, Swanson 2007, Sadlier 1990, Brown 2012
Carlia bomberai	NA	53.9	0.466300123	NA	NA	NA	NA	30.62466477	30.14186468	41.05147243	5.217042292	NA	NA	NA	NA	NA	Zug and Allison 2006
Carlia caesius	NA	64.5	0.718068319	NA	NA	NA	NA	30.71676949	30.0990688	41.06545018	4.663813098	-0.001647125	0.010679998	-0.006458986	0.023025959	-0.00881249	Zug and Allison 2006
Carlia decora	NA	49	0.332643142	NA	NA	NA	NA	30.49900307	30.20422525	41.27076248	5.684538241	-0.001281711	-0.100504908	-0.003364984	0.022652817	-0.009781045	Hoskin and Couper 2012
Carlia dogare	NA	50	0.360974144	NA	NA	NA	NA	30.56381351	30.14667043	41.03836964	5.447995375	-0.001490403	-0.128712827	0.001586578	0.029374883	-0.007543047	Cogger 2000, Wilson and Swan 2003, Ingram and Covacevich 1989
Carlia fusca	32.7	67	0.771395538	NA	NA	NA	NA	32.7	31.24235996	41.70674028	4.58953412	-0.001647125	0.010679998	-0.006458986	0.023025959	-0.00881249	Fitch 1970, Zweifel 1980, Rodda et al. 2001, Crombie and Pregill 1999, de Rooij 1915, Greer 1989, McCoy 1980, Heatwole 1975, Towns 1994, Mys 1988, James and Shine 1988, Doria 1874, Taylor 1985, Sinervo et al. 2010, Kohler 2005, Setiadi and Hamidy 2006, Bailey 1976, Wilhoft 1961, Towns 1994, McCoid 1994, Brattstrom 1965, Albuquerque et al. 2015
Carlia gracilis	NA	41	0.082679073	NA	NA	NA	NA	30.48432412	30.20707308	41.03017442	6.060001679	-0.001203564	-0.156720145	0.002397384	0.027623935	-0.006801821	Cogger 2000, Wilson and Swan 2003, Ingram and Covacevich 1989, Wilson and Swan 2008, James and Shine 1988, Horner 1999, James 1984, Swanson 2007
Carlia johnstonei	NA	43.5	0.165681811	NA	NA	NA	NA	30.51468913	30.19296417	41.0347826	5.877613521	-0.000828297	-0.185605623	0.002156484	0.024717696	-0.007438485	Cogger 2000, Wilson and Swan 2003, Greer 2005, Ingram and Covacevich 1989, Wilson and Swan 2008
Carlia munda	NA	44	0.181708692	NA	38.7	NA	NA	28.7823066	28.57434906	38.7	4.569804736	-0.001100226	-0.140971281	0.000580088	0.024453361	-0.007992088	Cogger 2000, Wilson and Swan 2003, Greer 1989, Greer 2005, Covacevich and Ingram 1978, Horner 1999, Kohler 2005, Swanson 2007, Kutt et al. 2011, Sadlier 1990, Brown 2012
Carlia mysi	NA	62.3	0.669401903	NA	NA	NA	NA	30.69896579	30.10734118	41.06274831	4.770751474	NA	NA	NA	NA	NA	McCoy 2006, McCoy 2015
Carlia pectoralis	NA	64	0.707155136	NA	41.3	NA	NA	30.82129336	30.20180165	41.21065707	4.767239579	-0.001621663	-0.064217989	-0.004403507	0.023103073	-0.010342306	Cogger 2000, Wilson and Swan 2003, Ingram and Covacevich 1989, Goodman and Isaac 2008, Goodman 2007, Goodman et al. 2009, Swanson 2007, Hoskin and Couper 2012
Carlia rhomboidalis	28.9	61	0.639830037	NA	41.2	NA	NA	28.9	29.30538595	41.2	5.2988082	-0.001199594	-0.121290707	-0.001102188	0.024253116	-0.008567328	Fitch 1970, Cogger 2000, Tinkle et al. 1970, Wilson and Swan 2003, Greer 1989, Ingram and Covacevich 1989, Cree 1994, Wilson and Swan 2008, James and Shine 1988, Radder et al. 2008, Goodman 2007, Taylor 1985, Goodman et al. 2009, Sinervo et al. 2010, Kohler 2005, Heatwole and Taylor 1987, Swanson 2007, Wilhoft 1961, Brattstrom 1965
Carlia rubrigularis	31.7	61	0.639830037	NA	NA	NA	NA	31.7	30.88420155	41.91913471	5.226774708	-0.001117477	-0.142076506	0.001160608	0.025853415	-0.007353611	Cogger 2000, Wilson and Swan 2003, Goodman 2006, Ingram and Covacevich 1989, Goodman 2006b, Goodman and Isaac 2008, Goodman 2007, Goodman et al. 2009, Manicom and Schwarzkopf 2010, Swanson 2007, Andersson et al. 2010, Kutt et al. 2011, Manicom et al. 2014, Munoz et al. 2016
Carlia rufilatus	NA	42	0.116471959	NA	NA	NA	NA	30.49668662	30.20132892	41.03205055	5.98574603	-0.000862915	-0.212584486	0.003442785	0.027778266	-0.00757698	Cogger 2000, Wilson and Swan 2003, Ingram and Covacevich 1989, Horner 1999, Swanson 2007
Carlia schmeltzii	30.8	69	0.812643714	NA	42.3	NA	NA	30.8	30.51989144	42.3	5.303192122	-0.001453601	-0.090170828	-0.002548802	0.024019854	-0.009346074	Cogger 2000, Wilson and Swan 2003, Ingram and Covacevich 1989, Swanson 2007, Wilhoft 1961, Kutt et al. 2011, Brown 2012
Carlia tetradactyla	NA	64	0.707155136	NA	NA	NA	NA	30.71277711	30.10092384	41.0648443	4.687793455	-0.00165467	-0.084687385	-0.003298284	0.024529085	-0.010557388	Shine and Greer 1991, Cogger 2000, Wilson and Swan 2003, Greer 1989, Greer 2005, Ingram and Covacevich 1989, Wilson and Swan 2008, James and Shine 1988, Fischer and Lindenmayer 2005, Kohler 2005, Michael et al. 2010, Michael and Lindenmayer 2010, Michael et al. 2011, Brown 2012, Swan et al. 2017
Carlia vivax	30.5	50	0.360974144	NA	41.3	NA	NA	30.5	30.2042468	41.3	5.643492736	-0.001702219	-0.081261709	-0.002264822	0.026367499	-0.009472365	Cogger 2000, Wilson and Swan 2003, Greer 2005, Ingram and Covacevich 1989, Goodman 2006, Sinervo et al. 2010, Singh et al. 2002, Swanson 2007, Kutt et al. 2011, Swan et al. 2017
Carlia wundalthini	NA	49	0.332643142	NA	NA	NA	NA	30.57576884	30.16458387	41.04405201	5.510736828	-0.00186333	-0.115349148	0.002012548	0.032896351	-0.007732484	Hoskin 2014
Celatiscincus euryotis	NA	42	0.116471959	NA	NA	NA	NA	29.53702128	29.60475957	40.74185387	6.923722229	NA	NA	NA	NA	NA	Bauer and Sadlier 2000, Bauer and Vindum 1990, Sadlier et al. 2006, Bauer and Sadlier 1994, Whittaker et al. 2004
Celestus badius	31.9	104	1.254276021	NA	NA	NA	NA	31.9	31.78774496	41.57816957	7.330935927	NA	NA	NA	NA	NA	Powell 1999b, Thomas 1966, Sinervo et al. 2010, Henderson and Powell 2009, Corry et al. 2010
Celestus costatus	NA	127	1.556236949	NA	NA	NA	NA	29.59555346	30.31929215	40.80993967	6.614656466	NA	NA	NA	NA	NA	Tinkle et al. 1970, Fitch 1970, Schwartz and Henderson 1991, Greene et al. 2006, Dunham et al. 1988, Henderson and Powell 2009
Celestus cyanochloris	NA	99	1.179810477	NA	NA	NA	NA	28.79324849	29.99327763	40.57300671	7.427287398	NA	NA	NA	NA	NA	Savage 2002, Kohler 2003, Corry et al. 2010
Celestus darlingtoni	NA	85	0.949377861	NA	NA	NA	NA	30.48478955	31.07454978	41.13747007	7.972430657	NA	NA	NA	NA	NA	Schwartz and Henderson 1991, Henderson and Powell 2009, Corry et al. 2010
Celestus hylaius	NA	107	1.297255546	NA	NA	NA	NA	28.83621359	29.97331417	40.57952706	7.169216514	NA	NA	NA	NA	NA	Savage 2002, Kohler 2003, Guyer and Donnelly 2005, Corry et al. 2010
Celestus stenurus	NA	172	2.014638995	NA	NA	NA	NA	29.76325135	30.24137238	40.83538939	5.607375169	NA	NA	NA	NA	NA	Fitch 1970, Schwartz and Henderson 1991, Greene et al. 2006, Henderson and Powell 2009, Ober 1968, Corry et al. 2010, Corry et al. 2010
Cercosaura bassleri	NA	65	0.808239904	NA	NA	NA	NA	NA	NA	NA	NA	-0.002226377	0.004718801	-0.006844434	0.026666465	-0.008168029	Dixon and Soini 1986, Ribeiro-Junior and Amaral 2017
Cercosaura doanae	NA	55.6	0.584236962	NA	NA	NA	NA	NA	NA	NA	NA	-0.000814697	0.215416896	-0.022473878	0.000874716	-0.016326847	Echevarria et al. 2015
Cercosaura eigenmanni	29.9	52	0.488243041	NA	NA	NA	NA	29.9	30.95454166	41.50734093	10.24437566	-0.002122079	0.007215243	-0.00290601	0.028940462	-0.008003833	Vitt et al. 2003, Avila-Pires 1995, Pianka and Vitt 2003, Gainsbury and Colli 2003, Duellman 2005, Uzzell 1973, Doan 2008, Vitt et al. 1998, Huey et al. 2001, Sinervo et al. 2010, Anaya-Rojas et al. 2010, Duellman 1987, Doan and Lamar 2012, Mesquita et al. 2016, Ribeiro-Junior and Amaral 2017, Pianka et al. 2017,
Cercosaura hypnoides	NA	36.8	-0.007570503	NA	NA	NA	NA	27.24752789	29.58873108	40.67655973	11.27987882	-0.002230473	-0.004050217	-0.005278335	0.027094414	-0.00822027	Doan and Lamar 2012, Fernando Castro Hererra, pers. Comm. April 2017
Cercosaura manicata	30.1	73	0.974692084	NA	NA	NA	NA	30.1	30.88478895	41.54151266	9.175946128	-0.001523228	0.019379658	-0.009184953	0.018466355	-0.011076705	Duellman 1978, Duellman 1990, Uzzell 1973, Sinervo et al. 2010, Fitch 1968, Doan and Lamar 2012, Torres-Carvajal and Salazar-Valenzuela 2013
Cercosaura parkeri	NA	48	0.373458566	NA	NA	NA	NA	29.38652901	30.69737833	41.34770875	10.48629994	-0.002000393	0.000992196	-0.004028278	0.027543221	-0.008914141	Doan and Lamar 2012, Barreto et al. 2012, Ribeiro-Junior and Amaral 2017
Cercosaura schreibersii	NA	55	0.568677601	NA	NA	NA	NA	27.45833757	29.49077969	40.70855208	10.01364552	-0.001898676	-0.014911095	-0.006388259	0.02402075	-0.010507116	Fitzgerald et al. 1999, Wiens et al. 2006, Avila-Pires 1995, Cei 1986, Cei 1993, Nogueira et al. 2005, Achaval and Olmos 2003, Colli et al. 2002, Vitt 1991, Milstead 1961, Carreira et al. 2005, Kohler 2005, Balestrin 2008, Balestrin et al. 2010, Dos Santos et al. 2012, Doan and Lamar 2012, Cano and Leynaud 2010, Truntau et al. 2016, Ribeiro-Junior and Amaral 2017
Chalarodon madagascariensis	NA	90	1.260715487	NA	NA	NA	NA	33.60889782	32.64269565	42.13941744	9.028682644	-0.001571104	-0.023853724	-0.009574256	0.019506211	-0.011414049	Zug et al. 2001, Glaw and Vences 1994, Henkel and Schmidt 2000, Cadle 2004, Blanc 1977, Glaw and Vences 2007, Randriamahazo and Mori 2001, Gardner and Jasper 2012
Chalarodon steinkampi	NA	59.6	0.555470263	NA	NA	NA	NA	NA	NA	NA	NA	-0.001338412	-0.026810081	-0.00966697	0.019407206	-0.011664869	Miralles et al. 2015
Chalcides lanzai	NA	120	1.588676243	32.1	NA	NA	NA	29.35628126	30.44000949	42.04587552	7.80011702	-0.000629338	-0.176490112	-0.000488531	0.019533707	-0.009327832	Scleich et al. 1996, Bogaerts 2006, Sanchez-Hernandez et al. 2013
Chalcides mertensi	NA	195	1.451675525	NA	NA	NA	NA	31.42230299	31.74094991	42.73467608	8.143845069	-0.000502637	-0.126509132	-0.00221537	0.016449262	-0.009088846	Carranza et al. 2008
Chalcides minutus	NA	114.8	0.883116405	NA	NA	NA	NA	31.21430618	31.83759432	42.70311062	9.393182788	-0.000739902	-0.137362019	-0.003029025	0.019006464	-0.011023191	IUCN, Carranza et al. 2008, Caputo et al. 2000
Chalcides pseudostriatus	NA	202	1.489523234	NA	NA	NA	NA	31.43614887	31.73451651	42.73677732	8.060679451	-0.000786087	-0.125513015	-0.003482244	0.019139935	-0.011149312	Greer 2001, Carranza et al. 2008, Greer et al. 1998, Caputo et al. 2000
Chalcides ragazzii	NA	127.4	1.672592083	NA	NA	NA	NA	31.50312121	31.70339823	42.74694101	7.658408499	-0.000389924	-0.160890775	0.000972607	0.017552083	-0.006262645	Scleich et al. 1996, Greenbaum et al. 2006, Ineich 1999
Chalcides sexlineatus	NA	99	1.318906043	NA	NA	NA	NA	31.37373173	31.76351824	42.72730494	8.435589437	NA	NA	NA	NA	NA	Arnold and Ovenden 2004, Rogner 1997b, Nagy et al. 1999, Salvador and Brown 2007, Brown and Nagy 2007, Bogaerts 2006, Maso and Pijoan 2011, Hauschild and Gassner 1995, Sanchez-Hernandez et al. 2013
Chalcides striatus	NA	210	1.531203877	NA	NA	NA	NA	31.45139696	31.72743158	42.73909136	7.969091438	-0.000924959	0.056113405	-0.013845811	0.011388547	-0.016303931	Arnold and Ovenden 2004, Sindaco et al. 2006, Corti and Cascio 2002, Carranza et al. 2008, Greer et al. 1998, Perez-Quintero 1988, Malkmus 2004, Sindaco et al. 2010, Maso and Pijoan 2011, Caputo et al. 2000
Chalcides viridanus	NA	129	1.690094175	NA	NA	NA	NA	31.50952403	31.70042321	42.74791269	7.619949836	-0.00026738	-0.291155074	0.002783633	0.024524911	-0.009166233	Arnold and Ovenden 2004, Salvador 2007, Salvador 2008, Greer et al. 1998, Bogaerts 2006, Maso and Pijoan 2011, Sanchez-Hernandez et al. 2013
Chamaeleo namaquensis	34.2	160	1.910041554	29.3	NA	NA	NA	34.2	29.3	42.14011256	6.868544336	-0.000705935	-0.172911445	-0.001009055	0.017959985	-0.008484235	Fitzsimons 1943, Perry and Garland 2002, Pianka and Vitt 2003, Necas 1999, Andrews 2008, Alexander and Marais 2007, Dunham et al. 1988, Warne and Charnov 2008, Branch 1988, Sinervo et al. 2010, Kohler 2005, Tilbury 2010, Dimaki et al. 2001, Avery 1982, Brattstrom 1966, Mesquita et al. 2016, Schleicher 2015, Branch 2016
Chamaesaura aenea	NA	137	1.072836521	NA	NA	NA	NA	30.60799425	32.18048844	42.09392765	9.105519693	-0.001495921	-0.097997858	-0.003838364	0.023529008	-0.010380709	Fitzsimons 1943, Branch 1998, Du Toit et al. 2003, Loveridge 1944, Branch 2016
Chamaesaura anguina	NA	152.5	1.187859784	NA	NA	NA	NA	30.65007337	32.16093664	42.10031355	8.852770426	-0.001329186	-0.034809553	-0.007418793	0.018691243	-0.012784417	Fitch 1970, Spawls et al. 2002, Fitzsimons 1936, 1943, Branch 1998, Costandius and Mouton 2006, Rogner 1997b, Du Toit et al. 2003, Loveridge 1944, Wiens et al. 2006, Shine and Wall 2008, Branch 2016
Chamaesaura macrolepis	NA	166	1.278887086	NA	NA	NA	NA	30.68337402	32.1454637	42.10536724	8.652749289	-0.001432379	-0.028278988	-0.005091303	0.022801648	-0.010686142	Spawls et al. 2002, Fitzsimons 1943, Branch 1998, Broadley 1971, Salvidio et al. 2004, Du Toit et al. 2003, Loveridge 1944, Branch 2005, Haagner et al. 2000
Chamaesaura miopropus	NA	120	0.930656859	NA	NA	NA	NA	30.55598045	32.20465632	42.08603407	9.417941759	-0.002281591	-0.075890168	-0.002697669	0.02939274	-0.009500157	Haagner et al. 2000, Broadley and Cotterill 2004, Loveridge 1944, Branch 2014
Chatogekko amazonicus	27.5	29	-0.214677946	NA	NA	NA	NA	27.5	29.29753895	40.38159721	11.31617541	-0.002269666	0.000328805	-0.004791901	0.028276935	-0.007775875	Vitt et al. 2005, Zug et al. 2001, Avila-Pires 1995, Martins 1991, Zimmerman and Rodrigues 1990, Duellman 1990, Pianka and Vitt 2003, Hoogmoed 1973, Vitt 2000, Vitt and Zani 1998, Vitt et al. 1999, Huey et al. 2001, Sinervo et al. 2010, Avila-Pires et al. 2010, Daza et al. 2009, Gasc 1990, De Sousa et al. 2010, Vitt et al. 2008, Gamble et al. 2015, Mesquita et al. 2016, Bauer and Russell 1992, Pi…
Cnemaspis kallima	NA	35.1	0.024592949	NA	NA	NA	NA	28.91410507	30.07046937	40.93118815	10.84907708	NA	NA	NA	NA	NA	Manamendra-Arachchi et al. 2007, Somaweera and Somaweera 2009
Cnemaspis kolhapurensis	NA	40.9	0.207968053	NA	NA	NA	NA	28.98118945	30.03929903	40.94136883	10.44613317	NA	NA	NA	NA	NA	Giri et al. 2009, Gamble et al. 2015, Srinivasulu et al. 2014
Cnemaspis sisparensis	NA	62	0.706793455	NA	NA	NA	NA	29.16367547	29.95450805	40.9690628	9.350026595	-0.001991628	-0.113443304	0.000235997	0.030854142	-0.0081023	Tikader and Sharma 1992, Srinivasulu et al. 2014
Cnemidophorus arubensis	39.4	127	1.795829572	NA	NA	NA	NA	39.4	36.13768222	45.37956463	9.751998895	NA	NA	NA	NA	NA	Fitch 1985, Zug et al. 2001, Cooper and Vitt 2002, Vitt and de Carvalho 1992, Vitt and Breitenbach 1993, Pianka and Vitt 2003, Paulissen and Walker 1994, van Buurt 2005, Schall 1983, Sinervo et al. 2010, Kohler 2005, Schall 1973, Goessling et al. 2015, Schall 1974
Cnemidophorus cryptus	39.4	72	1.029304064	NA	NA	NA	NA	39.4	36.43253343	45.42816174	11.4424693	-0.002321666	0.002730831	-0.004460026	0.028811743	-0.007472035	Avila-Pires 1995, Vitt et al. 1997, Mesquita and Colli 2003, Huey et al. 2001, Sinervo et al. 2010, Rocha et al. 2009, Mesquita et al. 2016, Ribeiro-Junior and Amaral 2016
Cnemidophorus duellmani	NA	92.2	1.363313164	NA	NA	NA	NA	38.27160306	35.64188517	45.04018793	10.6812047	-0.001440667	-0.009214351	-0.004961733	0.022968085	-0.008801853	McCranie and Hedges 2013
Cnemidophorus espeuti	NA	100	1.473	NA	NA	NA	NA	NA	NA	NA	NA	NA	NA	NA	NA	NA	McCranie and Hedges 2013
Cnemidophorus flavissimus	NA	74	1.066310648	NA	NA	NA	NA	38.1629502	35.69237004	45.02369884	11.33383067	NA	NA	NA	NA	NA	Ugueto et al. 2009
Cnemidophorus gaigei	NA	100	1.473	NA	NA	NA	NA	NA	NA	NA	NA	NA	NA	NA	NA	NA	McCranie and Hedges 2013
Cnemidophorus gramivagus	37.7	116	1.673464346	NA	NA	NA	NA	37.7	35.18715317	44.8347187	9.98471971	-0.002305318	-0.033082862	-0.000266573	0.03244878	-0.007054202	Avila-Pires 1995, Mesquita and Colli 2003, Sinervo et al. 2010, Rocha et al. 2009, McCrystal and Dixon 1987, Mesquita et al. 2016
Cnemidophorus murinus	40.4	159	2.099345057	35.9	NA	NA	NA	40.4	35.9	45.51697018	9.174454885	NA	NA	NA	NA	NA	Cox et al. 2003, Olesen and Valido 2003, Cooper and Vitt 2002, Dearing and Schall 1994, Pianka and Vitt 2003, Paulissen and Walker 1994, Alvarez 2004, Bennett and Gorman 1979, van Buurt 2005, Andrews and Pough 1980, Sinervo et al. 2010, Kohler 2005, Damuth 1987, Schall and Dearing 1994
Cnemidophorus rostralis	NA	79	1.154620254	NA	NA	NA	NA	38.19525663	35.67735906	45.02860164	11.13978133	NA	NA	NA	NA	NA	Ugueto and Harvey 2010
Cnemidophorus ruatanus	NA	113.4	1.6428466	NA	NA	NA	NA	37.48549048	35.07305159	44.76693115	10.04755676	NA	NA	NA	NA	NA	McCranie and Hedges 2013
Cnemidophorus senectus	NA	81	1.188388409	NA	NA	NA	NA	38.20761009	35.6716191	45.0304764	11.06558002	NA	NA	NA	NA	NA	Ugueto et al. 2009, Ugueto and Rivas 2010
Cnemidophorus splendidus	37	80	1.17160986	NA	NA	NA	NA	NA	NA	NA	NA	NA	NA	NA	NA	NA	Markezich et al. 1997
Cnemidophorus vanzoi	41	133	1.858178603	NA	NA	NA	NA	41	37.05261483	45.89570944	9.649451166	NA	NA	NA	NA	NA	Schwartz and Henderson 1991, Malhotra and Thorpe 1999, Funk and Fa 2006, Dickinson and Fa 2000, Henderson and Powell 2009, Daltry 2009, Corke 1987, Funk and Fa 2006
Coleodactylus brachystoma	NA	26.9	-0.311635728	NA	NA	NA	NA	28.71930354	30.03305912	40.76659932	11.55822877	-0.002587649	-0.068557757	-0.001906226	0.03279469	-0.008140729	Brandao and Motta 2005, Colli et al. 2002
Coleodactylus meridionalis	NA	30.5	-0.149629477	NA	NA	NA	NA	28.77857052	30.00552109	40.77559364	11.20224025	-0.002204617	-0.105084034	0.001282253	0.034136725	-0.008200652	Colli et al. 2002, Rodrigues 2003, Rodrigues 1996, Vanzolini et al. 1980, De Sousa et al. 2010, Ribeiro et al. 2013, Ribeiro and Silva 2014, Mesquita et al. 2016, Travassos et al. 2015, Oliveira et al. 2014, Alcantara et al. 2015
Coleodactylus natalensis	NA	24	-0.458772612	NA	NA	NA	NA	28.66547624	30.05806963	40.75843052	11.88154371	-0.001860135	-0.141726721	0.000699451	0.031449451	-0.009395762	De Sousa and Freire 2010, De Sousa et al. 2010, Lisboa and Freire 2012, Lisboa et al. 2012
Coleodactylus septentrionalis	NA	32	-0.087704564	NA	NA	NA	NA	28.8012246	29.99499501	40.77903161	11.06616798	-0.002635255	0.00994988	-0.0062513	0.028669079	-0.0074753	Vitt et al. 2005, Avila-Pires 1995, Molina et al. 2004, Vitt and Zani 1998, Hoogmoed 1985, Huey et al. 2001, Sinervo et al. 2010, Daza et al. 2009, Mesquita et al. 2016
Colobosaura modesta	NA	55	0.568677601	NA	NA	NA	NA	30.48553699	31.26720794	41.69257672	10.07977998	-0.002416745	-0.049790336	-0.002162941	0.031574047	-0.008180786	Avila-Pires 1995, Mesquita et al. 2006b, Nogueira et al. 2005, Cunha 1977, Colli et al. 2002, Freire et al. 2012, Mesquita et al. 2016, Ribeiro-Junior and Amaral 2017, de Amorim et al. 2017, Torelli et al. 2017
Colobosauroides carvalhoi	NA	35.9	-0.043078131	NA	NA	NA	NA	29.08568154	30.68105905	41.27632305	11.39834387	-0.002156465	-0.1098709	0.004103533	0.037482437	-0.006627257	Rodrigues 2003
Colobosauroides cearensis	NA	46	0.31242636	NA	NA	NA	NA	29.21573626	30.62062994	41.29606008	10.61716711	-0.0020083	-0.12579881	0.002401492	0.034465944	-0.008011509	da Cunha et al. 1991, Rodrigues 2003
Concinnia tigrinus	NA	85	1.105093711	NA	NA	NA	NA	28.4613025	30.20309765	38.46951986	5.565990532	-0.001117477	-0.142076506	0.001160608	0.025853415	-0.007353611	Cogger 2000, Wilson and Swan 2003, Wilson and Swan 2008, Wilson and Swan 2017
Conolophus marthae	NA	470	3.643474834	NA	NA	NA	NA	37.14125686	33.46352312	44.12870616	6.007237127	NA	NA	NA	NA	NA	Gentile and Snell 2009, Zug 2013, Gentile et al. 2016
Conolophus pallidus	37.6	500	3.723338853	33.2	NA	NA	NA	37.6	33.2	44.15330876	5.890760418	NA	NA	NA	NA	NA	Perry and Garland 2002, Fitch 1982, Cooper and Vitt 2002, Christian and Tracy 1985, Van Denburgh and Slevin 1913, Clusella-Trullas et al. 2008, Carpenter 1969, Sinervo et al. 2010, Snell and Christian 1985, Zug 2013, Christian and Tracy 1982, Passos et al. 2015
Conolophus subcristatus	36.5	530	3.798547884	NA	NA	NA	NA	36.5	32.60972248	43.81099887	5.692545242	NA	NA	NA	NA	NA	Clobert et al. 1998, Fitch 1982, Werner 1982, Ord and Blumstein 2002, Van Denburgh and Slevin 1913, Heller 1903, Warne and Charnov 2008, Carpenter 1969, Costantini et al. 2005, Sinervo et al. 2010, Kohler 2005, Snell and Christian 1985, Werner 1983, Zug 2013, Gentile et al. 2016
Contomastix lacertoides	35.2	76.9	1.118230917	NA	NA	NA	NA	35.2	34.10472976	44.09797101	11.13768499	-0.001685314	0.006943279	-0.006878607	0.02328288	-0.010483454	Cei 1986, Cei 1993, Achaval and Olmos 2003, Milstead 1961, Carreira et al. 2005, Balestrin 2008, Balestrin et al. 2010, Menezes and Rocha 2011, Ariani et al. 2012
Contomastix vacariensis	NA	81.8	1.201662774	NA	NA	NA	NA	36.29818416	34.71707592	44.4496584	10.97767884	-0.00123657	0.058534447	-0.014709376	0.011708618	-0.012521452	Feltrim and De Lema 2000, Rezende-Pinto et al. 2009, Caruccio et al. 2010, Filho et al. 2013
Copeoglossum nigropunctatum	34.9	113	1.504390294	NA	NA	NA	NA	34.9	33.16776767	42.79056537	8.627402711	-0.00218832	-0.014773642	-0.004248033	0.028216732	-0.008240155	Duellman and Mendelson 1995, Avila-Pires 1995, Pianka and Vitt 2003, Huang 2006b, Mesquita et al. 2006b, Gainsbury and Colli 2003, Nogueira et al. 2005, Vitt 2000, Molina et al. 2004, Vitt and Zani 1998, Duellman 2005, Bartlett and Bartlett 2003, Colli et al. 2002, Lotzkat 2007, Vitt and Zani 1996b, Vitt et al. 1997, Vitt et al. 1999, Huey et al. 2001, Fuenmayor et al. 2005, Sinervo et al. 2010, …
Cryptagama aurita	NA	46	0.476863067	NA	NA	NA	NA	35.20791998	35.20101286	44.06797878	8.286963678	-0.000684633	-0.152148552	0.000331859	0.020247315	-0.007847139	Cogger 2000, Wilson and Swan 2003, Manthey and Schuster 1996
Cryptoblepharus nigropunctatus	NA	55	0.494631124	NA	NA	NA	NA	31.47643409	30.66271171	41.54242384	6.267464964	NA	NA	NA	NA	NA	Horner 2007, Zug 2013
Ctenoblepharys adspersa	NA	75	1.047823677	NA	NA	NA	NA	31.92091254	31.81453061	41.73712656	9.547137017	NA	NA	NA	NA	NA	Etheridge 1995, Pincheira-Donoso et al. 2008, Perez and Balta 2007
Ctenophorus adelaidensis	35.1	53	0.667876575	NA	NA	NA	NA	35.1	35.0880534	44.486356	8.543267959	-0.001126843	-0.145360183	-0.002873666	0.022666082	-0.012547551	Cogger 2000, Wilson and Swan 2003, Wilson and Swan 2008, Todd 2008, Bush et al. 2010, Davidge 1979, Chen et al. 2013, Brown 2012
Ctenophorus butleri	NA	45	0.447224855	NA	NA	NA	NA	NA	NA	NA	NA	NA	NA	NA	NA	NA	Cogger 2014, Wilson and Swan 2010, Brown 2012
Ctenophorus chapmani	NA	52	0.642190382	NA	NA	NA	NA	35.38054453	35.26256364	44.57917859	8.606044438	-0.001061203	-0.165462265	-0.002278976	0.022901472	-0.013088551	Wilson and Swan 2010
Ctenophorus cristatus	NA	112	1.67682196	NA	43	NA	NA	35.88986865	34.59259853	43	5.305186512	-0.000581142	-0.215041529	0.000473724	0.021867168	-0.010146016	Cogger 2000, Melville et al. 2006, Wilson and Swan 2003, Greer 1989, Manthey and Schuster 1996, Wilson and Swan 2008, Chapman and Dell 1985, Kohler 2005, Swanson 2007, Chen et al. 2013, Brown 2012
Ctenophorus femoralis	NA	57	0.765991427	NA	NA	NA	NA	37.24344555	36.67600869	45.12704602	8.312594243	-0.00047551	-0.162294645	-8.78E-05	0.017637587	-0.008026987	Cogger 2000, Melville et al. 2006, Wilson and Swan 2003, Greer 1989, Manthey and Schuster 1996, Uetz 2006, Wilson and Swan 2008, Kohler 2005, Chen et al. 2013, Brown 2012
Ctenophorus fordi	37.2	58	0.78944392	NA	45	NA	NA	37.2	36.6039923	45	8.182221953	-0.000640996	-0.217362542	0.000366419	0.02202394	-0.010702273	Cogger 2000, Melville et al. 2006, Huey and Pianka 1981, Pianka 1986, Wilson and Swan 2003, Henle 1991, Greer 1989, Dunham et al. 1988, Wilson and Swan 2008, Warne and Charnov 2008, Huey et al. 2001, Kohler 2005, Uller and Olsson 2010, Huey and Pianka 2007, Abensperg-Traun and Steven 1997, Witten 1993, Turner 1977, Heatwole and Taylor 1987, Swan and Watharow 2005, Chen et al. 2013, Brown 2012, Pi…
Ctenophorus gibba	NA	96	1.468952179	NA	NA	NA	NA	37.03184224	35.76021525	44.62510557	6.65368151	-0.000268519	-0.167408811	-0.000309527	0.0167797	-0.007923523	Wilson and Swan 2003, Greer 1989, Wilson and Swan 2008, Swanson 2007, Chen et al. 2013
Ctenophorus isolepis	43.7	83	1.272737477	NA	NA	NA	NA	43.7	40.30885542	47.30120793	7.410266105	-0.000529239	-0.157229699	-0.000382699	0.018418269	-0.008425029	Cogger 2000, Melville et al. 2006, Dunham and Miles 1985, Huey and Pianka 1981, Pianka 1986, Pianka and Vitt 2003, Wilson and Swan 2003, Henle 1991, Greer 1989, Uetz 2006, Dunham et al. 1988, Wilson and Swan 2008, Warne and Charnov 2008, Huey et al. 2001, Todd 2008, Daly et al. 2008, Melville and Schlute 2001, Turner 1977, Sinervo et al. 2010, Kohler 2005, Znari and El Mouden 1997, Huey and Piank…
Ctenophorus maculatus	37.5	67	0.983962262	37	NA	NA	NA	37.5	37	45.30836086	7.852173682	-0.001126843	-0.145360183	-0.002873666	0.022666082	-0.012547551	Fitch 1970, Cogger 2000, Wilson and Swan 2003, Henle 1991, Greer 1989, Wilson and Swan 2008, Chapman and Dell 1985, Sinervo et al. 2010, Kohler 2005, Abensperg-Traun and Steven 1997, Swanson 2007, Light et al. 1966, Chen et al. 2013, Brown 2012, Pianka 2014
Ctenophorus maculosus	39.8	70	1.043029414	NA	48.9	NA	NA	39.8	38.68095649	48.9	9.84741179	-0.000479899	-0.191052349	8.66E-05	0.019620758	-0.009179987	Cogger 2000, Wilson and Swan 2003, Henle 1991, Olsson 1995, Jessop et al. 2009, Devi Stuart-Fox, pers. Comm. 01 January 2010, Mitchell 1973, Kohler 2005, Heatwole and Taylor 1987, Chen et al. 2013, Brown 2012
Ctenophorus mckenziei	NA	77	1.171553702	NA	NA	NA	NA	38.78054806	37.79868249	45.78886958	7.492547698	-0.001061203	-0.165462265	-0.002278976	0.022901472	-0.013088551	Cogger 2000, Wilson and Swan 2003, Uetz 2006, Wilson and Swan 2008, Chen et al. 2013
Ctenophorus parviceps	NA	52	0.642190382	NA	NA	NA	NA	35.91823307	35.57809128	44.75396019	8.617791183	-0.000504357	-0.15241127	-0.000299697	0.016978883	-0.008167582	Cogger 2000, Wilson and Swan 2003, Wilson and Swan 2008, Greer and Smith 2000, Chen et al. 2013, Brown 2012
Ctenophorus pictus	34.4	74.9	1.134266044	NA	45	NA	NA	34.4	35.00213506	45	8.050700061	-0.000595098	-0.14436291	-0.002546365	0.018556728	-0.010346878	Fitch 1970, Cogger 2000, Melville et al. 2006, Wilson and Swan 2003, Greer 1989, Uetz 2006, Wilson and Swan 2008, Uller et al. 2009, Henle 1989c, Melville and Schlute 2001, Niejalke 2006, Olsson et al. 2009, Swanson 2007, Swan and Watharow 2005, Chen et al. 2013, Brown 2012, Pianka 2014, Swan et al. 2017
Ctenophorus reticulatus	37	108	1.627780761	36.9	46.5	NA	NA	37	36.9	46.5	7.364596212	-0.000464157	-0.174103408	-0.000212583	0.018189531	-0.008357361	Melville et al. 2006, Huey and Pianka 1981, Cooper and Vitt 2002, Pianka 1986, Wilson and Swan 2003, Henle 1991, Greer 1989, Uetz 2006, Wilson and Swan 2008, Huey et al. 2001, Chapman and Dell 1985, Sinervo et al. 2010, Bush 1992, Abensperg-Traun and Steven 1997, Licht et al. 1966, Light et al. 1966, Chen et al. 2013, Brown 2012, Pianka 2014, Mesquita et al. 2016, Huey and Pianka 2017, Pianka et …
Ctenophorus rubens	NA	80	1.22309441	NA	NA	NA	NA	NA	NA	NA	NA	NA	NA	NA	NA	NA	Cogger 2014
Ctenophorus salinarum	NA	77.9	1.187223806	NA	NA	NA	NA	38.04245969	36.87399333	45.43241748	7.489867105	-0.000744114	-0.167318101	-0.001356187	0.020116873	-0.010536242	Cogger 2000, Melville et al. 2006, Wilson and Swan 2003, Henle 1991, Greer 1989, Uetz 2006, Chapman and Dell 1985, Swanson 2007, Chen et al. 2013
Ctenophorus scutulatus	38.9	115	1.712466794	38.2	NA	NA	NA	38.9	38.2	45.92173085	6.248928327	-0.000454107	-0.179526443	-0.000190805	0.018492193	-0.008404806	Melville et al. 2006, Huey and Pianka 1981, Pianka 1986, Wilson and Swan 2003, Greer 1989, Uetz 2006, Wilson and Swan 2008, Huey et al. 2001, Chapman and Dell 1985, Chapman and Dell 1985, Sinervo et al. 2010, Kohler 2005, Abensperg-Traun and Steven 1997, Chen et al. 2013, Brown 2012, Huey and Pianka 2017, Pianka et al. 2017,
Ctenotus allotropis	NA	55	0.494631124	NA	NA	NA	NA	34.19210011	33.90484416	42.35940362	8.923378172	-0.001187788	-0.153723796	-0.000718151	0.024799659	-0.009283483	Cogger 2000, Wilson and Swan 2003, Greer 2005, Michael and Lindenmayer 2010, Swan et al. 2017
Ctenotus arcanus	NA	90	1.185249063	NA	NA	NA	NA	34.72874162	34.28548178	43.15742248	8.711936269	-0.001961615	-0.027931071	-0.00544203	0.023553329	-0.010903567	Cogger 2000, Wilson and Swan 2003, Greer 2005, Swanson 2007, Swan et al. 2017
Ctenotus ariadnae	36.3	64.3	0.713713232	NA	NA	NA	NA	36.3	35.17480225	43.05861435	8.474678703	-0.000522824	-0.150857185	-0.000979121	0.017459629	-0.00871187	Huey and Pianka 1981, Cogger 2000, Pianka 1986, Wilson and Swan 2003, Greer 1989, Greer 2005, Huey et al. 2001, Sinervo et al. 2010, Kohler 2005, Pianka 1986, Heatwole and Taylor 1987, Gordon et al. 2010, Pianka 2014, Mesquita et al. 2016, Craig et al. 2007
Ctenotus atlas	36.8	75	0.929572819	35.5	NA	NA	NA	36.8	35.5	43.23478116	7.998200747	-0.000556431	-0.204029314	0.000276903	0.020536825	-0.009686476	Huey and Pianka 1981, Cogger 2000, Pianka 1986, Wilson and Swan 2003, Greer 1989, Greer 2005, Sinervo et al. 2010, Kohler 2005, Huey and Pianka 2007, Heatwole and Taylor 1987, Brown 2012, Smith et al. 2013, Mesquita et al. 2016, Craig et al. 2007, Swan et al. 2017, Pianka et al. 2017,
Ctenotus australis	NA	110	1.46665698	32.6	NA	NA	NA	34.67555905	32.6	42.9157482	7.356169321	-0.000819573	-0.148718061	-0.001672141	0.020363491	-0.009946471	Cogger 2000, Wilson and Swan 2003, Pough et al. 1997, Greer 2005, Bustard 1968, Sinervo et al. 2010, Bush et al. 2010, Davidge 1979, Light et al. 1966
Ctenotus borealis	NA	121	1.600313961	NA	NA	NA	NA	34.59659367	33.71689877	42.42078931	6.493778109	-0.00161345	-0.154813531	0.003924584	0.033590744	-0.006303651	Cogger 2000, Wilson and Swan 2003, Horner 1999
Ctenotus brevipes	NA	60	0.616650387	45	45	NA	NA	41.76988642	45	45	7.039698365	-0.001117477	-0.142076506	0.001160608	0.025853415	-0.007353611	Horner 2007b
Ctenotus brooksi	31.2	57	0.544719909	NA	NA	NA	NA	31.2	32.12974585	41.38361281	8.747546343	-0.000456045	-0.171484921	-0.000432003	0.01837522	-0.008869147	Huey and Pianka 1981, Cogger 2000, Cox et al. 2003, Pianka 1986, Wilson and Swan 2003, Greer 2005, Wilson and Swan 2008, Huey et al. 2001, Todd 2008, Horner 1999, James 1991, Sinervo et al. 2010, Heatwole and Taylor 1987, Swan and Watharow 2005, Pianka 2014, Mesquita et al. 2016, Huey and Pianka, Pianka et al. 2017,
Ctenotus delli	NA	63	0.685070634	NA	NA	NA	NA	33.52138726	33.25487901	42.02274434	8.400640581	-0.001192483	-0.125258101	-0.003468357	0.022430692	-0.01200655	Cogger 2000, Wilson and Swan 2003, Bush et al. 2010
Ctenotus duricola	NA	59	0.593081146	NA	NA	NA	NA	NA	NA	NA	NA	-0.000504357	-0.15241127	-0.000299697	0.016978883	-0.008167582	Cogger 2014, Rabosky et al. 2017
Ctenotus dux	33	66.5	0.760891093	NA	NA	NA	NA	33	33.22014112	41.98292183	8.298539919	-0.000483845	-0.170187597	-0.000406524	0.018699529	-0.008848191	Huey and Pianka 1981, Cogger 2000, Pianka 1986, Wilson and Swan 2003, Greer 2005, Huey et al. 2001, Horner 1999, Huey and Pianka 2007, Heatwole and Taylor 1987, Gordon et al. 2010, Pianka 2014, Mesquita et al. 2016, Craig et al. 2007, Huey and Pianka
Ctenotus essingtonii	NA	73	0.891669515	NA	NA	NA	NA	35.53464206	34.91260253	44.00552286	8.677326909	-0.001365464	-0.148445019	0.002542596	0.029722079	-0.006828631	Cogger 2000, Wilson and Swan 2003, Greer 1989, Greer 2005, James and Shine 1988, Horner 2007b, Horner 1999, Kohler 2005, James 1984, Swanson 2007, Sadlier 1990
Ctenotus euclae	33.7	50	0.360974144	NA	NA	NA	NA	NA	NA	NA	NA	NA	NA	NA	NA	NA	Cogger 2014
Ctenotus eurydice	NA	76.6	0.959174697	NA	NA	NA	NA	34.96834222	34.88913022	44.00703777	10.69102079	-0.001961615	-0.027931071	-0.00544203	0.023553329	-0.010903567	Cogger 2000, Wilson and Swan 2003, Greer 2005, Swanson 2007
Ctenotus gemmula	NA	60	0.616650387	NA	NA	NA	NA	33.8026149	33.28292843	42.14262897	8.680020944	-0.001126843	-0.145360183	-0.002873666	0.022666082	-0.012547551	Cogger 2000, Wilson and Swan 2003, Greer 1989, Kohler 2005, Bush et al. 2010
Ctenotus grandis	35.3	122	1.611855893	NA	NA	NA	NA	35.3	34.12523361	42.64870756	6.483691047	-0.000497816	-0.155985146	-0.000679626	0.017794923	-0.008656628	Huey and Pianka 1981, Cogger 2000, Cooper and Vitt 2002, Pianka 1986, Wilson and Swan 2003, Greer 2005, Huey et al. 2001, Horner 1999, Sinervo et al. 2010, Huey and Pianka 2007, Heatwole and Taylor 1987, Pianka 2014, Mesquita et al. 2016, Huey and Pianka, Pianka et al. 2017,
Ctenotus hebetior	NA	60	0.616650387	NA	NA	NA	NA	35.61160448	34.69090519	42.81309328	8.685292415	-0.000539048	-0.14353344	-0.000616223	0.017798617	-0.008752203	Cogger 2000, Wilson and Swan 2003, Swanson 2007
Ctenotus hilli	NA	50	0.360974144	NA	NA	NA	NA	34.14320418	33.92756334	42.3519832	9.217072709	-0.00161345	-0.154813531	0.003924584	0.033590744	-0.006303651	Cogger 2000, Wilson and Swan 2003, Horner 1999, James 1984
Ctenotus impar	NA	66	0.750307368	NA	NA	NA	NA	34.28563452	33.86138398	42.37359834	8.361561531	-0.001126843	-0.145360183	-0.002873666	0.022666082	-0.012547551	Cogger 2000, Wilson and Swan 2003, Henle 1991, Greer 1989, Greer 2005, Chapman and Dell 1985, Kohler 2005, Bush et al. 2010
Ctenotus ingrami	NA	84	1.088497815	NA	NA	NA	NA	34.69334697	34.30192768	43.15205101	8.924535065	-0.001154781	-0.1332544	-0.001823374	0.023373647	-0.009068401	Cogger 2000, Wilson and Swan 2003, Greer 2005, Swan et al. 2017
Ctenotus inornatus	NA	95	1.261069521	NA	NA	NA	NA	34.47248738	33.77456398	42.40195501	7.239225432	-0.000981056	-0.167544805	0.002020026	0.025522223	-0.007281065	Cogger 2000, Wilson and Swan 2003, Greer 2005, Horner 1999, Swanson 2007
Ctenotus lancelini	NA	87	1.137707667	32.2	NA	NA	NA	33.63816426	32.7026576	41.98871651	7.555317785	-0.001192483	-0.125258101	-0.003468357	0.022430692	-0.01200655	Cogger 2000, Wilson and Swan 2003, Greer 2005, Pearson and Jones 2000
Ctenotus leae	38	62	0.662632765	NA	NA	NA	NA	38	35.76915545	44.45535593	9.226058212	-0.000453235	-0.189024563	2.94E-05	0.019303347	-0.008890664	Huey and Pianka 1981, Cogger 2000, Cooper and Vitt 2002, Pianka 1986, Wilson and Swan 2003, Greer 1989, Greer 2005, Huey et al. 2001, Horner 1999, Sinervo et al. 2010, Kohler 2005, Heatwole and Taylor 1987, Mesquita et al. 2016, Pianka et al. 2017,
Ctenotus leonhardii	38.4	79	1.002437878	NA	NA	NA	NA	38.4	36.17880121	43.69503345	7.895406614	-0.000567966	-0.157492935	-0.000696589	0.018671285	-0.008674005	Huey and Pianka 1981, Cogger 2000, Cox et al. 2003, Cooper and Vitt 2002, Pianka 1986, Wilson and Swan 2003, Greer 1989, Greer 2005, Read 1998, Huey et al. 2001, Storr et al. 1999, Horner 1999, Sinervo et al. 2010, Kohler 2005, Huey and Pianka 2007, Schlesinger et al. 2010, James 1991 (Oecologia), Hutchinson 1993, Heatwole and Taylor 1987, Brown 2012, Swan et al. 2017, Huey and Pianka 2017, Piank…
Ctenotus mimetes	NA	82	1.054704929	NA	NA	NA	NA	34.39699272	33.8096421	42.39049799	7.692685873	-0.000819573	-0.148718061	-0.001672141	0.020363491	-0.009946471	Cogger 2000, Wilson and Swan 2003, Henle 1991, Greer 1989, Chapman and Dell 1985, Storr et al. 1999, Kohler 2005, Doughty et al. 2011
Ctenotus nasutus	36.6	46	0.244045038	NA	NA	NA	NA	36.6	35.4142439	43.15800505	9.528617348	-0.000476449	-0.191198368	-3.98E-05	0.019992959	-0.008903014	Cogger 2000, Wilson and Swan 2003, Horner 1999, Mesquita et al. 2016, Pianka et al. 2017,
Ctenotus orientalis	NA	82	1.054704929	35.3	45.5	9.1	NA	37.13657929	35.3	45.5	9.1	-0.000749834	-0.058911807	-0.009110157	0.014132446	-0.013782989	Swanson 2007, Swan and Watharow 2005, Swan et al. 2017
Ctenotus pallasotus	NA	65	0.728897229	NA	NA	NA	NA	NA	NA	NA	NA	-0.000504357	-0.15241127	-0.000299697	0.016978883	-0.008167582	Rabosky et al. 2017
Ctenotus piankai	37.5	60	0.616650387	NA	NA	NA	NA	37.5	35.79905787	43.42693712	8.726547714	-0.000577885	-0.155824062	-0.000287027	0.019018072	-0.008360034	Cogger 2000, Cox et al. 2003, Pianka 1986, Pianka and Vitt 2003, Wilson and Swan 2003, Greer 2005, Huey et al. 2001, Horner 1999, Huey and Pianka 2007, Heatwole and Taylor 1987, Goodyear and Pianka 2011, Pianka 2014, Craig et al. 2007, Rabosky et al. 2017, Huey and Pianka 2017, Pianka et al. 2017,
Ctenotus pulchellus	NA	85	1.105093711	NA	NA	NA	NA	34.41542652	33.80107695	42.39329549	7.581962813	-0.000539048	-0.14353344	-0.000616223	0.017798617	-0.008752203	Cogger 2000, Wilson and Swan 2003, Swanson 2007
Ctenotus quattuordecimlineatus	36.1	71	0.852713208	NA	NA	NA	NA	36.1	34.88670282	42.95688545	8.175357009	-0.000529083	-0.139127507	-0.001120509	0.017458512	-0.009025833	Cogger 2000, Cox et al. 2003, Pianka 1986, Wilson and Swan 2003, Henle 1991, Greer 2005, Huey et al. 2001, Horner 1999, Sinervo et al. 2010, Huey and Pianka 2007, James 1991 (Oecologia), Heatwole and Taylor 1987, Goodyear and Pianka 2011, Pianka 2014, Mesquita et al. 2016, Craig et al. 2007, Huey and Pianka 2017, Pianka et al. 2017,
Ctenotus regius	36.4	83	1.07170316	35.6	45.1	8.7	NA	36.4	35.6	45.1	8.7	-0.000479899	-0.191052349	8.66E-05	0.019620758	-0.009179987	Cogger 2000, Cooper and Vitt 2002, Wilson and Swan 2003, Henle 1991, Greer 2005, Huey and Bennett 1987, Read 1998, Henle 1989c, Horner 1999, Sinervo et al. 2010, Michael and Lindenmayer 2010, Heatwole and Taylor 1987, Swanson 2007, Bennett and John-Alder 1986, Swan and Watharow 2005, Brown 2012, Swan et al. 2017, Grimm-Seyfarth et al. 2017
Ctenotus rhabdotus	NA	61	0.639830037	NA	NA	NA	NA	NA	NA	NA	NA	-0.000793679	-0.158626759	0.000870184	0.021657126	-0.00729999	Rabosky et al. 2017
Ctenotus robustus	35	125	1.645922432	34.4	NA	NA	NA	35	34.4	44.08851789	7.491036567	-0.001124316	-0.099163598	-0.003217766	0.021942669	-0.010253223	Cogger 2000, Brown 1991, Wilson and Swan 2003, Allison 2006, Greer 2005, James and Shine 1988, Bjursell 2001, Goodman 2006, Taylor 1985, Fischer and Lindenmayer 2005, Sinervo et al. 2010, Michael et al. 2010, Heatwole and Taylor 1987, Swanson 2007, Michael et al. 2011, Taylor 2004, Swan and Watharow 2005, Brown 2012, Swan et al. 2017
Ctenotus rosarium	NA	43.8	0.175319903	NA	NA	NA	NA	33.83934219	33.82066398	42.26497983	9.619870132	-0.000910379	-0.122019174	-0.001990603	0.020225717	-0.009266624	Wilson and Swan 2003, Greer 2005, Couper et al. 2002
Ctenotus schomburgkii	33.4	57	0.544719909	NA	NA	NA	NA	33.4	33.420755	42.09874713	8.795609187	-0.00058377	-0.167301939	-0.000724647	0.019084149	-0.009355116	Huey and Pianka 1981, Cogger 2000, Pianka 1986, Wilson and Swan 2003, Greer 1989, Greer 2005, Read 1998, Huey et al. 2001, Henle 1989c, Horner 1999, Sinervo et al. 2010, Kohler 2005, Bush et al. 2010, Huey and Pianka 2007, Schlesinger et al. 2010, Heatwole and Taylor 1987, Swanson 2007, Pianka 2014, Mesquita et al. 2016, Swan et al. 2017, Huey and Pianka 2017, Pianka et al. 2017,
Ctenotus storri	NA	40	0.048051712	NA	NA	NA	NA	34.02872731	33.9807543	42.33461026	9.904680706	-0.00161345	-0.154813531	0.003924584	0.033590744	-0.006303651	Cogger 2000, Wilson and Swan 2003, Greer 1989, James and Shine 1988, Horner 1999, Kohler 2005
Ctenotus strauchii	NA	63	0.685070634	NA	NA	NA	NA	34.10667593	33.24117654	40.71404326	7.382038328	-0.000670581	-0.145484881	-0.000971108	0.019391615	-0.008570416	Cogger 2000, Wilson and Swan 2003, Greer 2005, Read 1998, Horner 1999, Bustard 1968, Swanson 2007, Brown 2012, Swan et al. 2017
Ctenotus taeniatus	33.7	50	0.360974144	NA	NA	NA	NA	NA	NA	NA	NA	-0.000268519	-0.167408811	-0.000309527	0.0167797	-0.007923523	Cogger 2014, Swan et al. 2017
Ctenotus taeniolatus	35.3	89	1.169580331	35.3	44.7	11.4	NA	35.3	35.3	44.7	11.4	-0.001621663	-0.064217989	-0.004403507	0.023103073	-0.010342306	Cogger 2000, Wilson and Swan 2003, Greer 1989, Greer 2005, Cree 1994, Dunham et al. 1988, Huey and Bennett 1987, Warne and Charnov 2008, James and Shine 1988, Goodman 2006, Fischer and Lindenmayer 2005, Sinervo et al. 2010, Kohler 2005, Michael and Lindenmayer 2010, Heatwole and Pianka 1993, Hutchinson 1993, Heatwole and Taylor 1987, Swanson 2007, Kutt et al. 2011, Taylor 2004, Brown 2012, Mesqui…
Ctenotus tantillus	NA	46.4	0.256186559	NA	NA	NA	NA	34.10486958	33.94537527	42.34616557	9.447330351	-0.000793679	-0.158626759	0.000870184	0.021657126	-0.00729999	Cogger 2000, Wilson and Swan 2003, Horner 1999, Swanson 2007
Ctenotus vertebralis	NA	55	0.494631124	NA	NA	NA	NA	34.19210011	33.90484416	42.35940362	8.923378172	-0.00161345	-0.154813531	0.003924584	0.033590744	-0.006303651	Cogger 2000, Wilson and Swan 2003, James and Shine 1988, Horner 1999, James 1984, Swanson 2007, Sadlier 1990
Cyclura cornuta	NA	640	4.041966883	NA	NA	NA	NA	37.86169497	34.90028219	44.50299993	4.939502785	NA	NA	NA	NA	NA	Clobert et al. 1998, Wiewandt 1982, Schwartz and Henderson 1991, Ord and Blumstein 2002, Rogner 1997a, Garrick 2008, Fitch 1982, Warne and Charnov 2008, Kohler 2005, Henderson and Powell 2009, Perez-Buitrago et al. 2010, Carey 1975, Rivero 1998, Van Wilgen and Richardson 2012, Boylan 1985
Cyclura cychlura	NA	655	4.071869144	NA	NA	NA	NA	38.39565454	35.20211941	44.67467361	4.885222592	NA	NA	NA	NA	NA	Schwartz and Henderson 1991, Iverson et al. 2006, Iverson et al. 2005, Henderson and Powell 2009, Perez-Buitrago et al. 2010, Carey 1975, Iverson et al. 2004
Cyclura lewisi	NA	550	3.846357913	NA	NA	NA	NA	37.73666113	34.90215236	44.47475775	5.368160856	NA	NA	NA	NA	NA	IUCN 2014, Henderson and Powell 2009
Cyclura pinguis	35.3	560	3.869614816	NA	NA	NA	NA	35.3	33.46331918	43.68121964	5.26363772	NA	NA	NA	NA	NA	Clobert et al. 1998, Perry and Garland 2002, Cooper and Vitt 2002, Rodda et al. 2001, Schwartz and Henderson 1991, Warne and Charnov 2008, Lemm et al. 2005, Henderson and Powell 2009, Carey 1975, Mitchell 1999
Cyclura ricordi	NA	485	3.684024447	NA	NA	NA	NA	38.33094986	35.31333735	44.67822968	5.739149073	NA	NA	NA	NA	NA	Wiewandt 1982, Schwartz and Henderson 1991, Ord and Blumstein 2002, Kohler 2005, Henderson and Powell 2009, Arias et al. 2004
Cyclura stejnegeri	NA	533	3.805833265	NA	NA	NA	NA	NA	NA	NA	NA	NA	NA	NA	NA	NA	Powell and Glor 2000, Henderson and Powell 2009
Darevskia derjugini	NA	65	0.806907315	NA	NA	NA	NA	31.06518648	32.39027441	42.55595561	7.092541684	-0.001079529	0.075765757	-0.014370877	0.010933912	-0.01565374	Szczerbak 2003, Baran and Atatur 1998, Arnold 1998, Rogner 1997b, Orlova and Bischoff 1984, Roitberg 1999, Kohler 2005, Kidov et al. 2017, Kurnaz et al. 2018
Darevskia pontica	NA	61.6	0.738052682	NA	NA	NA	NA	31.03999729	32.40197841	42.55213291	7.24384115	-0.000876063	0.122267815	-0.016219077	0.005594749	-0.015923551	Tuniyev et al. 2011, Ljubisavljevic et al. 2008, Kidov and Timoshina 2017
Darevskia praticola	29	66	0.826474154	NA	NA	NA	NA	29	31.17085028	41.88340339	7.00427201	-0.001193899	0.078409432	-0.012106792	0.01146582	-0.014694525	Arnold and Ovenden 2004, Szczerbak 2003, Anderson 1999, Baran and Atatur 1998, Street 1979, Arnold 1998, Rogner 1997b, Valakos et al. 2008, Ljubisavljevic et al. 2008, Kwet 2009, Roitberg 1999, Kohler 2005, Tuniyev et al. 2011, Arakelyan et al. 2011, Bogin et al. 1999, Stojanov et al. 2011, Nikolskii 1915, Tomovic et al. 2015, Speybroeck et al. 2016, Kwet 2015, Corovic and Crnobrnja-Isailovic 2018
Delma australis	NA	93	0.659790122	NA	NA	NA	NA	29.21786349	32.55416452	41.45075542	8.606766946	-0.000678134	-0.181372582	-0.000825417	0.02064285	-0.010310296	Cogger 2000, Wilson and Swan 2003, Greer 1989, Storr et al. 1990, Chapman and Dell 1985, Kohler 2005, Henkel 2010, Rosler 2005, Swan and Watharow 2005, Shea 1991, Brown 2012, Maryan et al. 2015, Swan et al. 2017
Delma grayii	NA	125	0.835863628	NA	NA	NA	NA	30.86825316	33.45492174	41.97606991	8.254515815	-0.000714501	-0.14994913	-0.00121466	0.019235289	-0.009353508	Cogger 2000, Wiens et al. 2006, Wilson and Swan 2003, Henle 1991, Greer 1989, Wilson and Swan 2008, Chapman and Dell 1985, Kohler 2005, Henkel 2010, Bush et al. 2010, Wilson and Swan 2011, Brown 2012
Delma impar	NA	100	0.703	NA	NA	NA	NA	29.69060925	32.81496122	41.60168719	8.521801246	-0.000682279	0.124282352	-0.019158149	0.005324631	-0.017135964	Cogger 2000, Wiens et al. 2006, Wilson and Swan 2003, Greer 1989, Kutt 1993, Sinervo et al. 2010, Henkel 2010, Daza et al. 2009, Brown 2012, Swan et al. 2017
Delma labialis	NA	126	0.840608017	NA	NA	NA	NA	29.13464953	32.43577942	41.41224209	8.206179093	-0.001281711	-0.100504908	-0.003364984	0.022652817	-0.009781045	Cogger 2000, Wilson and Swan 2003, Wilson and Swan 2008, Henkel 2010, Swanson 2007, Wilson 2005, Macdonald et al. 2013
Delma plebeia	NA	122	0.821399328	NA	NA	NA	NA	29.55886297	32.69210615	41.55135518	8.257808995	-0.001961615	-0.027931071	-0.00544203	0.023553329	-0.010903567	Cogger 2000, Wilson and Swan 2003, Greer 1989, Henkel 2010, Swanson 2007, Wilson 2005, Swan et al. 2017
Diploglossus fasciatus	NA	170	1.996962246	NA	NA	NA	NA	27.63203599	28.99752712	40.14373497	5.599798773	-0.00231037	-0.000227683	-0.002457726	0.030392755	-0.007549203	Avila-Pires 1995, Rodrigues and Cadle 1990, Duellman 1990, Greene et al. 2006, Domic et al. 2015, Corry et al. 2010, Ribeiro-Junior and Amaral 2016
Diploglossus monotropis	NA	215	2.351885841	NA	NA	NA	NA	29.8871603	30.18435977	40.85428618	4.866328963	-0.001602598	-0.017448439	-0.00367047	0.025085807	-0.008782725	Savage 2002, Myers 1973, Kohler 2003, Duellman 1990, Greene et al. 2006, Guyer and Donnelly 2005, Villa 1971, Diaz-Ayala et al. 2015, Corry et al. 2010, Sunyer et al. 2016, Ortega-Andrade et al. 2010
Diplolaemus bibronii	NA	120	1.750345243	NA	NA	NA	NA	28.59471834	28.87989474	40.32806744	7.901811263	-2.56E-05	0.214756159	-0.03052884	0.001310052	-0.021889286	Cei 1986, Donoso-Barros 1966, Cei et al. 2003, Scolaro 2005, Kohler 2005, Demangel 2016
Diplolaemus darwinii	NA	120	1.750345243	NA	NA	NA	NA	28.59471834	28.87989474	40.32806744	7.901811263	-0.000139028	0.220612238	-0.025652646	0.000655102	-0.023179276	Cei 1986, Donoso-Barros 1966, Cei et al. 2003, Scolaro 2005, Tuli et al. 2009, Demangel 2016
Diplolaemus leopardinus	NA	80	1.153571966	NA	NA	NA	NA	28.3763999	28.98133503	40.29493557	9.213146073	-0.001369085	0.077090307	-0.014371006	0.010226546	-0.01336126	Web and Greer 1969, Cei 1986, Donoso-Barros 1966, Scolaro 2006
Diplolaemus sexcinctus	NA	120	1.750345243	NA	NA	NA	NA	28.59471834	28.87989474	40.32806744	7.901811263	-0.00036305	-0.00039634	-0.010775034	0.011538135	-0.016439831	Cei et al. 2003, Scolaro 2005, Tuli et al. 2009, Demangel 2016, Demangel 2016b
Diporiphora albilabris	NA	59.5	0.823875179	NA	NA	NA	NA	36.42831489	35.8161828	44.58391772	7.243187936	-0.001034075	-0.172270488	0.002300361	0.026483099	-0.007239317	Cogger 2000, Wilson and Swan 2003, Greer 1989, Wilson and Swan 2008, Kohler 2005, Wells and Wellington 1983, Swanson 2007, Chen et al. 2013
Diporiphora bennettii	NA	80	1.22309441	NA	NA	NA	NA	36.57436184	35.748323	44.60608172	6.365953491	-0.000793679	-0.158626759	0.000870184	0.021657126	-0.00729999	Cogger 2000, Wilson and Swan 2003, Greer 1989, Manthey and Schuster 1996, Kohler 2005, Swanson 2007, Chen et al. 2013, Brown 2012
Diporiphora phaeospinosa	NA	75	1.136065223	NA	NA	NA	NA	37.75497751	36.36657017	44.96966269	6.594358959	-0.001154781	-0.1332544	-0.001823374	0.023373647	-0.009068401	Edwards and Melville 2011, Cogger 2014
Dipsosaurus dorsalis	42.1	154	2.203311582	38.8	47.5	14	61.4	42.1	38.8	47.5	14	-0.000674801	-0.143192615	-0.000868226	0.019028907	-0.008158892	Clobert et al. 1998, Dunham and Miles 1985, Fitch 1970, Melville et al. 2006, Perry and Garland 2002, Stebbins 2003, Grismer 2002, Ortega-Rubio et al. 1995, Zug et al. 2001, Wiewandt 1982, Cooper and Vitt 2002, Pianka 1986, Pianka and Vitt 2003, Smith 1946, Tracy 2004, Ord and Blumstein 2002, Pianka 1971, Linsdale 1932, Rogner 1997a, Van Denburgh 1922, Nagy et al. 1999, Dunham et al. 1988, Andrew…
Dopasia harti	NA	286	1.879810568	NA	NA	NA	NA	29.05421706	30.03875816	40.65085626	5.453052347	-0.00167137	0.018770596	-0.010054159	0.019489557	-0.011426304	Smith 1935, Pope 1929, Greene et al. 2006, Das 2010, Inger et al. 1990, Brygoo 1987, Bobrov 1993
Dryadosaura nordestina	NA	57	0.619898773	NA	NA	NA	NA	29.32821934	30.56836538	41.31313044	9.941534848	-0.001860135	-0.141726721	0.000699451	0.031449451	-0.009395762	Rodrigues et al. 2005, de Oliveira and Pessanha 2013, Garda et al. 2014, Mesquita et al. 2016
Echinosaura brachycephala	NA	78	1.069696378	NA	NA	NA	NA	26.43766576	28.69910511	40.34500723	8.886416661	-0.001460572	0.006975762	-0.006811861	0.021723515	-0.010774191	Kohler et al. 2004, Arteaga et al. 201
Emoia aenea	NA	71.8	0.86842583	NA	NA	NA	NA	31.89905884	30.74628816	41.59475368	5.409565072	-0.001647125	0.010679998	-0.006458986	0.023025959	-0.00881249	Allison 2006, Brown 1991, Zug and Allison 2006, Brown and Parker 1985
Emoia aurulenta	NA	49.5	0.346880187	NA	NA	NA	NA	31.70826104	30.83494115	41.56579833	6.555596543	-0.001540553	0.005064302	-0.004075824	0.024434791	-0.008609734	Allison 2006, Brown 1991, Brown and Parker 1985
Emoia bismarckensis	NA	72	0.872326631	NA	NA	NA	NA	31.90048588	30.74562509	41.59497025	5.40099355	NA	NA	NA	NA	NA	Brown 1991, Mys 1988, Foufopoulos and Richards 2007
Emoia guttata	NA	73	0.891669515	NA	NA	NA	NA	31.90756211	30.74233717	41.59604414	5.358489975	NA	NA	NA	NA	NA	Brown 1991, Brown and Allison 1986
Emoia impar	NA	50	0.360974144	NA	NA	NA	NA	31.71341705	30.83254544	41.5665808	6.524626832	NA	NA	NA	NA	NA	Crombie and Pregill 1999, Bruna et al. 1996, Buden 2000, Zug 1991, Buden 2007, Buden 1998, Zug 1991, Morrison 2003, McElroy 2007, Van Wilgen and Richardson 2012, Buden 1999, Zug 2013, Buden and Taborosi 2016, McCoy 2015
Emoia isolata	NA	60	0.616650387	NA	NA	NA	NA	31.80695147	30.78908527	41.58077553	5.962810191	NA	NA	NA	NA	NA	Brown 1991, McCoy 2006, McCoy 2015
Emoia jakati	NA	53.3	0.450602158	NA	NA	NA	NA	31.7462058	30.81731036	41.5715568	6.327680456	-0.001753697	0.016295694	-0.008842148	0.021617127	-0.009015246	Crombie and Pregill 1999, Brown 1991, Buden 2000, McCoy 2006, Mys 1988, Foufopoulos and Richards 2007, Buden 2000, Buden 2011, Zug 2013, Buden and Taborosi 2016, McCoy 2015
Emoia jamur	NA	51.3	0.396968972	NA	NA	NA	NA	31.72658509	30.826427	41.56857918	6.445532689	-0.001753697	0.016295694	-0.008842148	0.021617127	-0.009015246	Brown 1991, Zug and Allison 2006
Emoia lawesi	NA	106	1.414712639	NA	NA	NA	NA	32.09890774	30.65342963	41.62508263	4.209167977	NA	NA	NA	NA	NA	Brown 1991, Dunham et al. 1988, Schwaner 1980, Zug 2013, Mesquita et al. 2016
Emoia mivarti	NA	56.5	0.532364438	NA	NA	NA	NA	31.77611701	30.8034123	41.57609611	6.148018048	-0.001753697	0.016295694	-0.008842148	0.021617127	-0.009015246	Fitch 1970, Greer 1968, Zweifel 1980, de Rooij 1915, McCoy 1980, Heatwole 1975, Brown 1991, Mys 1988, Kohler 2005, Bailey 1976
Emoia nativitatis	NA	78	0.984573472	NA	NA	NA	NA	NA	NA	NA	NA	NA	NA	NA	NA	NA	Fitch 1970, Greer 1968, Brown 1991, Cogger et al. 1983, Cogger 2000, Kohler 2005
Emoia pallidiceps	NA	61.5	0.651277749	NA	NA	NA	NA	31.81961924	30.78319927	41.58269798	5.886720885	-0.001647125	0.010679998	-0.006458986	0.023025959	-0.00881249	Fitch 1970, Greer 1968, Zweifel 1980, Brown 1953, de Rooij 1915, Brown 1991, Zug and Allison 2006, Mys 1988, Kohler 2005, Woodruff 1972
Emoia physicae	NA	77.6	0.977363498	NA	NA	NA	NA	31.93891167	30.72777079	41.60080172	5.170188141	-0.001540553	0.005064302	-0.004075824	0.024434791	-0.008609734	Fitch 1970, Greer 1968, Zweifel 1980, Brown 1991, Zug and Allison 2006, Kohler 2005, Allison 1982, Hamidy and Mulyadi 2007, Brown and Allison 1986
Emoia physicina	NA	50.7	0.380470701	NA	NA	NA	NA	31.72054951	30.82923139	41.56766322	6.481785582	-0.001540553	0.005064302	-0.004075824	0.024434791	-0.008609734	Allison 2006, Brown 1991, Brown and Parker 1985
Emoia ponapea	NA	50.8	0.383233927	NA	NA	NA	NA	31.72156038	30.8287617	41.56781663	6.475713737	NA	NA	NA	NA	NA	Brown 1991, Buden 2000, Kiester 1982, Zug 2013, Buden and Taborosi 2016
Emoia popei	NA	65	0.728897229	NA	NA	NA	NA	31.84801489	30.77000541	41.58700729	5.716161764	NA	NA	NA	NA	NA	Zweifel 1980, Brown 1953, Brown 1991, Zug 2013, Yuezhao Wang, pers, comm. Sept. 2017
Emoia slevini	NA	85	1.105093711	NA	NA	NA	NA	31.9856394	30.70605905	41.6078931	4.889516936	NA	NA	NA	NA	NA	Brown 1991, McCoid 1994, Zug 2013, Kerr 2013, Goldberg 2017
Emoia tropidolepis	NA	73.4	0.899332577	NA	NA	NA	NA	31.9103655	30.74103459	41.59646958	5.341651352	-0.001540553	0.005064302	-0.004075824	0.024434791	-0.008609734	Brown 1953, Allison 2006, Loveidge 1948, Brown 1991, Zug and Allison 2006
Enyalioides azulae	NA	96	1.395505609	NA	NA	NA	NA	29.05123381	29.99966794	40.77702383	8.848186436	-0.000814697	0.215416896	-0.022473878	0.000874716	-0.016326847	Venegas et al. 2013
Enyalioides heterolepis	NA	138	1.906627877	NA	NA	NA	NA	28.39694132	29.41910652	40.53193408	7.706679862	-0.001602598	-0.017448439	-0.00367047	0.025085807	-0.008782725	Kohler 2003, Kohler 2008, Torres-Carvajal et al. 2011, Ortega-Andrade et al. 2010, Castro-Herrera et al. 2012
Enyalioides rubrigularis	NA	130	1.822518292	NA	NA	NA	NA	29.20744848	29.92708377	40.80073087	7.909879349	-0.001460572	0.006975762	-0.006811861	0.021723515	-0.010774191	Torres-Carvajal et al. 2009, Torres-Carvajal et al. 2011
Enyalius erythroceneus	NA	90	1.326927864	NA	NA	NA	NA	27.41570282	28.61972367	40.03562888	8.783266522	-0.00222255	-0.069040054	-0.000945565	0.031416127	-0.009352904	Rodrigues et al. 2006, Barreto-Lima et al. 2013
Eremias acutirostris	NA	80	1.073018552	NA	NA	NA	NA	35.67874323	34.39787408	43.48599451	6.471641532	-0.000336609	-0.106449965	-0.000706195	0.013087021	-0.006598989	Anderson 1999, Minton 1966, Khan 2006, Clark 1990, Yousefkhani et al. 2013, Khan 2015, Das and Das 2017
Eremias arguta	30.2	100	1.359	NA	NA	NA	NA	30.2	31.07281971	41.68693746	5.721254638	-0.000765904	-0.024764004	-0.009049892	0.014674805	-0.014830988	Arnold and Ovenden 2004, Szczerbak 2003, Anderson 1999, Perry and Garland 2002, Terbish et al. 2006, Kotenko 1986, Turner 1977, Kohler 2005, Arakelyan et al. 2011, Tertyshnikov 1976, Karmishev and Yarigin 2013, Nikolskii 1915, Torok 2008, Speybroeck et al. 2016
Eremias fasciata	NA	65	0.806907315	NA	NA	NA	NA	35.58139137	34.44310801	43.47122045	7.056387767	-0.000290585	-0.137822557	0.000378137	0.015542009	-0.006939101	Smith 1935, Anderson 1999, Khan 2006, Clark 1990, Khan 2015
Eremias grammica	NA	100	1.359	NA	NA	NA	NA	35.78336424	34.34926259	43.50187173	5.843232984	-0.000572706	-0.087146468	-0.005673054	0.016626834	-0.012936179	Szczerbak 2003, Anderson 1999, Perry and Garland 2002, Clark 1990, Szczerbak 1994, Shenbrot et al. 1991, Martin et al. 2017
Eremias intermedia	NA	69	0.883443667	NA	NA	NA	NA	35.60939077	34.43009826	43.47546963	6.888208685	-0.000526413	-0.10499433	-0.005073393	0.017040095	-0.012599016	Szczerbak 2003, Anderson 1999, Clark 1990, Yousefkhani and Rastegar-Pouyani 2013, Shenbrot et al. 1991
Eremias isfahanica	NA	67.6	0.8571727	NA	NA	NA	NA	NA	NA	NA	NA	-0.000476588	-0.129196435	-0.001527304	0.015513975	-0.00831719	Rastegar-Pouyani et al. 2016
Eremias kopetdaghica	NA	76	1.007280911	NA	NA	NA	NA	NA	NA	NA	NA	-0.000586929	-0.107591503	-0.005374783	0.015891535	-0.011607417	Yousefkhani et al. 2013, Anderson 1999, Ataev et al. 1994,
Eremias lalezharica	NA	71	0.920063387	NA	NA	NA	NA	35.62278742	34.42387359	43.47750269	6.80774142	-0.000258249	-0.148283574	0.00320595	0.017211122	-0.004844397	Anderson 1999, Yousefkhani and Rastegar-Pouyani 2013
Eremias lineolata	NA	55.1	0.595138368	NA	NA	NA	NA	35.50391963	34.47910477	43.45946339	7.521723604	-0.000423873	-0.092812861	-0.004950788	0.015107383	-0.011023858	Szczerbak 2003, Anderson 1999, Clark 1990, Yousefkhani and Rastegar-Pouyani 2013, Szczerbak 1994, Shenbrot et al. 1991, Martin et al. 2017
Eremias multiocellata	36.6	78	1.040571173	NA	41.1	9	NA	36.6	34.95096932	43.78751635	6.563326389	-0.000773098	-0.029653687	-0.006938709	0.014646745	-0.012842134	Szczerbak 2003, Rogovin et al. 2000, Terbish et al. 2006, Eremchenko 2007, Dujsebayeva et al. 2009, Sinervo et al. 2010, Yue et al. 2012, Sun et al. 2012, Tang et al. 2014, Li et al. 2011, Zeng et al. 2016, Li et al. 2017
Eremias nigrocellata	NA	83.2	1.123283936	NA	NA	NA	NA	35.69713189	34.38932991	43.48878516	6.361189622	-0.000536988	-0.072942914	-0.005199511	0.01547114	-0.010609441	Szczerbak 2003, Anderson and Leviton 1969, Clark 1990
Eremias persica	NA	98	1.333108149	NA	NA	NA	NA	35.77389218	34.35366372	43.50043426	5.900127095	-0.000415442	-0.126294086	-0.001673288	0.014689481	-0.008326525	Szczerbak 2003, Anderson 1999, Minton 1966, Leviton et al. 1992, Vanhooydonck and Van Damme 1999, Anderson and Leviton 1969, Khan 2006, Clark 1990
Eremias pleskei	40.3	60	0.70432434	NA	NA	NA	NA	40.3	37.25155248	45.01156003	7.385707171	-0.001009508	0.000966048	-0.009721758	0.013584781	-0.013104012	Fitch 1970, Szczerbak 2003, Andeson 1999, Baran and Atatur 1998, Rogner 1997b, Tadevosyan 2007, Kohler 2005, Curry-Lindahl 1979, Arakelyan et al. 2011
Eremias przewalskii	NA	98	1.333108149	NA	NA	NA	NA	36.3374121	34.68434979	43.68361264	5.912438172	-0.000633694	-0.045473211	-0.006214813	0.014591906	-0.012165264	Szczerbak 2003, Rogovin et al. 2000, Terbish et al. 2006, Sinervo et al. 2010, Li et al. 2009
Eremias scripta	NA	66	0.826474154	NA	NA	NA	NA	37.51899077	35.57260806	44.09981804	7.055565943	-0.000592587	-0.09844456	-0.00495451	0.016362746	-0.01186672	Szczerbak 2003, Anderson 1999, Minton 1966, Khan 2006, Clark 1990, Szczerbak 1994, Mishagina 2007, Shenbrot et al. 1991, Khan 2015
Eremias stummeri	NA	67	0.845746743	NA	NA	NA	NA	35.59560005	34.43650603	43.47337676	6.971042972	-0.001030715	0.025135392	-0.00902454	0.012355892	-0.013084839	Szczerbak 2003
Eremias suphani	NA	70.9	0.91825704	NA	NA	NA	NA	35.6221266	34.42418064	43.47740241	6.811710642	-0.000748419	-0.066967021	-0.006272033	0.014013171	-0.010418328	Baran and Atatur 1998, Franzen and Heckes 1999, Rastegar-Pouyani et al. 2013, Uzum et al. 2014
Eremias szczerbaki	NA	65.5	0.816728076	NA	NA	NA	NA	35.58498411	34.44143866	43.47176569	7.034807871	-0.001280201	-0.087883686	-0.005105823	0.018196758	-0.012264057	Szczerbak 2003
Eremias velox	NA	94	1.279700296	NA	NA	NA	NA	35.75435391	34.36274205	43.49746914	6.017484188	-0.000640876	-0.100817984	-0.00475777	0.017225405	-0.012169147	Fitch 1970, Smith 1935, Szczerbak 2003, Anderson 1999, Perry and Garland 2002, Vanhooydonck and Van Damme 1999, Clark 1990, Kohler 2005, Ataev et al. 1994, Nikolskii 1915, Shenbrot et al. 1991, Martin et al. 2017
Eumeces algeriensis	NA	210	2.373446103	NA	NA	NA	NA	32.93860342	32.01706523	42.85452227	5.983346922	-0.00072786	-0.185182423	-0.000459309	0.021089692	-0.010085297	Greer 2001, Bons and Geniez 1996, Kohler 2005, Schleich et al. 1996, Hauschild and Gassner 1995, Herrmann and Herrmann 2003
Eumeces cholistanensis	NA	102.7	1.370360962	NA	NA	NA	NA	32.57164333	32.18757092	42.79883264	8.187501351	-0.00027275	-0.08435922	0.001849608	0.013921483	-0.004009764	Masroor 2009
Eumeces persicus	NA	103.3	1.378529938	NA	NA	NA	NA	NA	NA	NA	NA	-0.000476588	-0.129196435	-0.001527304	0.015513975	-0.00831719	Faizi et al. 2017
Eumeces schneideri	33.1	186	2.203257297	NA	NA	NA	NA	33.1	32.17724106	42.91777585	6.362201764	-0.000542215	-0.110638936	-0.003181194	0.015766982	-0.009224817	Greer 2001, Schleich et al. 1996, Amitai and Bouskila 2001, Szczerbak 2003, Anderson 1999, Disi et al. 2001, Baran and Atatur 1998, Flower 1933, El Din 2006, Rogner 1997b, Reed and Marx 1959, Le Berre 1989, Khan 2006, Atatur and Gocmen 2001, Ahmadzadeh et al. 2008, Cooper et al. 2000, McElroy et al. 2008, Kohler 2005, Baier et al. 2009, Arakelyan et al. 2011, Bar and Haimovitch 2012, Fathinia et …
Eumecia anchietae	NA	300	1.91396662	NA	NA	NA	NA	33.2101477	32.01857722	42.21529338	7.687218639	-0.002778053	-0.036618231	-0.006045571	0.02760121	-0.009140703	Fitch 1970, Spawls et al. 2002, Loveridge 1936, Broadley 1971, Shine and Wall 2008, Haagner et al. 2000
Eurolophosaurus amathites	NA	68	1.098591734	NA	NA	NA	NA	34.37114746	33.97795978	42.76341571	9.767758622	-0.00222255	-0.069040054	-0.000945565	0.031416127	-0.009352904	Martins 1995, Rodrigues 1984, Rodrigues 2003, Rodrigues 1996, Grizante et al. 2011, Brandt and Navas 2011
Eurolophosaurus divaricatus	38	92	1.455539103	36.2	NA	NA	NA	38	36.2	43.97507823	9.037112773	-0.00222255	-0.069040054	-0.000945565	0.031416127	-0.009352904	Martins 1995, Gomes et al. 2004 , Kohlsdorf and Navas 2006, Kohlsdorf and Navas 2007, Rodrigues 2003, Rodrigues 1996, Sinervo et al. 2010, Grizante et al. 2011, Rocha and Rodrigues 2005, Gomes et al. 2004, Rocha et al. 2009, Kohlsdorf et al. 2004
Eutropis andamanensis	NA	132	1.722333224	NA	NA	NA	NA	32.10271217	31.40580718	41.81440097	7.306004554	NA	NA	NA	NA	NA	Tikader and Sharma 1992, Biswas and Sanyal 1980, Das 2002, Das and Das 2017
Eutropis austini	NA	75	0.929572819	NA	NA	NA	NA	NA	NA	NA	NA	NA	NA	NA	NA	NA	Batuwita 2016
Eutropis beddomei	NA	60	0.616650387	NA	NA	NA	NA	NA	NA	NA	NA	-0.001991628	-0.113443304	0.000235997	0.030854142	-0.0081023	Tikader and Sharma 1992, Inger et al. 1984, Srinivasulu et al. 2014, Amarasinghe et al. 2016
Eutropis bontocensis	NA	60	0.616650387	NA	NA	NA	NA	31.69821861	31.59375257	41.75301528	9.735604618	NA	NA	NA	NA	NA	Brown and Alcala 1980, Oliveros et al. 2011
Eutropis carinata	NA	160	1.992103424	NA	NA	NA	NA	32.2014026	31.3599513	41.82937816	6.713218202	-0.001423496	-0.091238059	-0.000409523	0.024635778	-0.00721178	Inger and Greenberg 1966, Smith 1935, Schleich and Kastle 2002, Daniel 1983, Tikader and Sharma 1992, Rogner 1997b, Deraniyagala 1953, Inger et al. 1984, Murthy 1995, Shrestha 2001, Radder et al. 2008, Somaweera and Somaweera 2009, Das 2002, Das and de Silva 2011, Aryal et al.2010, Chandramouli and Ganesh 2011, Ahmed 2009, Srinivasulu et al. 2014, Kastle et al. 2013, IUCN Bangladesh 2015, de Silv…
Eutropis clivicola	NA	63	0.685070634	NA	NA	NA	NA	31.72324889	31.58212241	41.75681386	9.585259663	-0.001991628	-0.113443304	0.000235997	0.030854142	-0.0081023	Inger et al. 1984, Chandramouli and Ganesh 2011, Srinivasulu et al. 2014
Eutropis cumingi	NA	54.2	0.474083696	NA	NA	NA	NA	31.64606323	31.61798624	41.74510021	10.04887713	NA	NA	NA	NA	NA	Huang 2006b, Brown and Alcala 1980, Brown et al. 1996, Oliveros et al. 2011
Eutropis englei	NA	70	0.832821571	NA	NA	NA	NA	31.77730083	31.55700751	41.76501674	9.260595416	NA	NA	NA	NA	NA	Brown and Alcala 1980, Alcala 1986
Eutropis floweri	NA	56	0.519899139	NA	NA	NA	NA	31.66282396	31.61019847	41.74764381	9.948203413	NA	NA	NA	NA	NA	Somaweera and Somaweera 2009, Das and de Silva 2011, Taylor 1950, de Silva and Ukuwela 2017
Eutropis gansi	NA	62.6	0.676138522	NA	NA	NA	NA	31.71998124	31.5836407	41.75631796	9.604886866	-0.001991628	-0.113443304	0.000235997	0.030854142	-0.0081023	Das 1991, Srinivasulu et al. 2014
Eutropis greeri	NA	73	0.891669515	NA	NA	NA	NA	NA	NA	NA	NA	NA	NA	NA	NA	NA	Batuwita 2016
Eutropis indeprensa	NA	67	0.771395538	NA	NA	NA	NA	31.75482926	31.56744879	41.76160647	9.395571459	-0.002491327	0.003281843	-0.002184307	0.031096793	-0.006216938	Das 2004, Brown and Alcala 1980, Malkmus et al. 2002, Das 2010, Gaulke 2011, Supsup et al. 2017
Eutropis multicarinata	NA	97	1.29028593	NA	NA	NA	NA	31.94465568	31.47924713	41.79041441	8.255374571	NA	NA	NA	NA	NA	Huang 2006b, Brown and Alcala 1961, Brown and Alcala 1980, Brown et al. 1996, Kohler 2005, Alcala 1986, Oliveros et al. 2011, Auffenberg and Auffenberg 1989, Auffenberg and Auffenberg 1988, Smith 1993, Gaulke 2011 , Zug 2013, Buden and Taborosi 2016
Eutropis multifasciata	33.7	140	1.804847427	NA	NA	NA	NA	33.7	32.31139151	42.3283857	7.15892596	-0.002200242	-0.0048188	-0.005469845	0.026499767	-0.008676308	Tinkle et al. 1970, Fitch 1970, Inger and Greenberg 1966, Smith 1935, Hendrickson 1966, Tikader and Sharma 1992, Taylor 1963, Grismer et al. 2006, Smedley 1931, Das 2004, Anderson 1889, Teynie 2004, Brown and Alcala 1961, Brown and Alcala 1980, Manthey and Grossmann 1997, Rogner 1997b, Ziegler 2002, Cox et al. 1998, Taylor 1922, Inger and Colwell 1977, Malkmus et al. 2002, Pauwels et al. 2003, Gr…
Eutropis nagarjunensis	NA	57	0.544719909	NA	NA	NA	NA	NA	NA	NA	NA	-0.000993964	-0.18827035	0.002304823	0.026088773	-0.006605873	Tikader and Sharma 1992, Srinivasulu et al. 2014
Eutropis quadratilobus	NA	NA	NA	NA	NA	NA	NA	31.85881296	31.51913342	41.77738697	8.770990916	-0.002464231	-0.252835092	-0.000472382	0.031338598	-0.009590625	Bauer and Gunther 1992
Eutropis rudis	32.9	127	1.668182215	NA	NA	NA	NA	32.9	31.89450318	42.07700132	7.442845572	-0.002502703	0.001244313	-0.005240869	0.029049357	-0.006674521	Das 2004, Brown and Alcala 1980, Manthey and Grossmann 1997, de Rooij 1915, Taylor 1922, Malkmus et al. 2002, Fitch 1970, Inger and Greenberg 1966, Inger and Lian 1996, Cree 1994, Howard et al. 2007, Das 2002, Sinervo et al. 2010, Das 2010, Alcala 1986, Das 2011, Inger 1959, Brattstrom 1965, Kurniati 2008, Goldberg 2017
Eutropis trivittata	NA	120	1.588676243	NA	NA	NA	NA	32.05381624	31.42852637	41.80698055	7.599699091	-0.001655708	-0.142972325	0.002689141	0.030918691	-0.00653671	Tikader and Sharma 1992, Seetharamaraju et al. 2011, Srinivasulu et al. 2014
Eutropis tytleri	NA	203.2	2.327285639	NA	NA	NA	NA	32.40588399	31.35101458	41.87459681	5.97848551	NA	NA	NA	NA	NA	Greer 2001, Smith 1935, Tikader and Sharma 1992, Das 2002, Das and Das 2017
Flexiseps ardouini	NA	137	1.072836521	NA	NA	NA	NA	NA	NA	NA	NA	NA	NA	NA	NA	NA	Henkel and Schmidt 2000, Raselimanana and Rakotomalala 2004
Flexiseps melanurus	NA	112	1.491924995	NA	NA	NA	NA	NA	NA	NA	NA	NA	NA	NA	NA	NA	Wiens et al. 2006, Glaw and Vences 1994, Raselimanana and Rakotomalala 2004, Ramanamanjato 2000, Glaw and Vences 2007, [poecilopus: Glaw and Vences 1994, Raselimanana and Rakotomalala 2004]
Gallotia auaritae	NA	444	3.269427145	35.4	NA	NA	NA	36.04047902	35.4	43.87851539	2.868371168	NA	NA	NA	NA	NA	IUCN 2010, Maso and Pijoan 2011
Gallotia bravoana	36	212	2.322017126	NA	NA	NA	NA	36	35.18193645	43.79246805	5.012114054	NA	NA	NA	NA	NA	Arnold and Ovenden 2004, Molina-Borja and Rodriguez-Dominguez 2004, Salvador 2007, Maso and Pijoan 2011
Gallotia galloti	33.5	145	1.835196975	35.5	NA	NA	NA	33.5	33.97141084	43.02716256	6.024266063	-0.00026738	-0.291155074	0.002783633	0.024524911	-0.009166233	Arnold and Ovenden 2004, Molina-Borja and Rodriguez-Dominguez 2004, Pianka and Vitt 2003, Vanhooydonck and Van Damme 1999, Rogner 1997b, Alvarez 2004, Valido and Nogales 2003, Nagy et al. 1999, Salvador 2009, Sinervo et al. 2010, Kohler 2005, Siliceo and Diaz 2010, Tersa et al. 2010, Castanet 1994, de los Santos and de Nicolas 2008, Garcia et al. 2007, Maso and Pijoan 2011, Castanet and Baez 1991…
Gallotia simonyi	35.6	502	3.426776669	NA	NA	NA	NA	35.6	34.52225143	43.59240275	2.566974622	NA	NA	NA	NA	NA	Arnold and Ovenden 2004, Molina-Borja and Rodriguez-Dominguez 2004, Salvador 2007, Rodriguez-Dominguez and Molina-Borja 1998, Amat 2008, Sinervo et al. 2010, Kohler 2005, Siliceo and Diaz 2010, Maso and Pijoan 2011, Hallmann and Griebeler 2015, Perez-Mendez et al. 2016
Gallotia stehlini	33.7	370	3.035763288	NA	NA	NA	NA	33.7	33.14857072	42.90222379	3.428242302	-0.00026738	-0.291155074	0.002783633	0.024524911	-0.009166233	Arnold and Ovenden 2004, Molina-Borja and Rodriguez-Dominguez 2004, Rogner 1997b, Nagy et al. 1999, Salvador 2007, Garrick 2008, Rodriguez-Dominguez and Molina-Borja 1998, Kohler 2005, Siliceo and Diaz 2010, Tersa et al. 2010, Castanet 1994, Maso and Pijoan 2011, Castanet and Baez 1991, Hallmann and Griebeler 2015, Perez-Mendez et al. 2016
Gambelia copeii	NA	140	1.839274888	NA	NA	NA	NA	38.16369439	34.78217525	45.02823672	11.6	-0.000674801	-0.143192615	-0.000868226	0.019028907	-0.008158892	Lappin and Swinney 1999, Stebbins 2003, Grismer 2002, McGuire 1996, Jones and Lovich 2009, Mahrdt et al. 2010, Stebbins and McGinnis 2012, Goldberg et al. 2012, Lemm 2006
Gambelia sila	39.2	125	1.76205181	NA	NA	NA	NA	39.2	35.45198949	45.21049733	11.0549811	-0.00076846	-0.066564689	-0.00595774	0.016796246	-0.012580075	Lappin and Swinney 1999, Fitch 1985, Perry and Garland 2002, Stebbins 2003, Smith 1946, McGuire 1996, Van Denburgh 1922, Warne and Charnov 2008, Todd 2008, Warrick et al. 1998, Jennings 1995, Turner et al. 1969, Sinervo et al. 2010, Kohler 2005, Jones and Lovich 2009, Curry-Lindahl 1979, Brattstrom 1965, Stebbins and McGinnis 2012, Germano and Williams 2005, Germano et al. 2007
Gambelia wislizenii	39.3	146	1.867869631	NA	NA	NA	69.6	39.3	35.46996791	45.23629467	10.8237986	-0.000769533	-0.065777897	-0.004773129	0.016668353	-0.011942847	Clobert et al. 1998, Huey and Pianka 1981, Melville et al. 2006, Tinkle et al. 1970, Fitch 1970, 1985, Perry and Garland 2002, Conant and Collins 1998, Stebbins 2003, Grismer 2002, Pianka 1986, Degenhardt et al. 1996, Pianka and Vitt 2003, Smith 1946, Greene 1982, McGuire 1996, Linsdale 1932, Rogner 1997a, Van Denburgh 1922, Dunham et al. 1988, Clusella-Trullas et al. 2008, Vitt and Price 1982, W…
Gerrhosaurus auritus	NA	215	2.412572649	NA	NA	NA	NA	33.12151102	32.23784348	42.4210491	5.770866442	-0.000879333	-0.154867315	-0.00094276	0.01925327	-0.007674313	Branch 1998
Gerrhosaurus flavigularis	33.3	147	1.903173978	NA	NA	NA	NA	33.3	32.53852977	42.51136439	6.898177091	-0.001770991	-0.096028779	-0.00274517	0.025888176	-0.009720363	Fitch 1970, Spawls et al. 2002, Fitzsimons 1943, Branch 1998, Loveridge 1936, Pianka and Vitt 2003, Broadley 1971, Parker 1936, Rogner 1997b, Loveridge 1953, Auerbach 1987, Branch 2005, Largen and Spawls 2006, Sinervo et al. 2010, Kohler 2005, Largen and Spawls 2010, Pienaar 1966, Curry-Lindahl 1979, Avery 1982, Jacobsen 1982, Truter 2011, Esser and Rodder 2012, Brattstrom 196, Loveridge 1942, Br…
Gerrhosaurus multilineatus	NA	215	2.412572649	NA	NA	NA	NA	33.18610417	32.27574819	42.44204582	5.772277592	-0.00279406	-0.0279374	-0.006073244	0.028103993	-0.009101394	FitzSimons 1943, Branch 1998, Cooper and Vitt 2002, Broadley 1971, Auerbach 1987, Loveridge 1942
Gerrhosaurus nigrolineatus	35.2	183	2.196661612	NA	NA	NA	NA	35.2	33.54059946	43.11037351	6.292437837	-0.002344695	-0.058063904	-0.002971312	0.029784502	-0.009016064	FitzSimons 1943, Spawls et al. 2002, Loveridge 1942, Branch 1998, Pianka and Vitt 2003, Broadley 1971, Parker 1936, Jeffery 1993, Schmidt et al. 1919, Rogner 1997b, Auerbach 1987, Branch 2005, Loveridge 1955, Pauwels and Vande weghe 2008, Pauwels et al. 2004, Sinervo et al. 2010, Kohler 2005, Jackson and Blackburn 2010, Bowker 1984, Carey and Judge 2000, Truter 2011, Loveridge 1942, Branch 2014, …
Glaucomastix abaetensis	38.2	72	1.029304064	NA	NA	NA	NA	NA	NA	NA	NA	NA	NA	NA	NA	NA	Dias et al. 2002, Dias and Rocha 2004, Colli et al. 2003, Sinervo et al. 2010, Menezes and Rocha 2011, Rocha et al. 2009, Travassos et al. 2015
Glaucomastix littoralis	38.7	81.8	1.201662774	NA	NA	NA	NA	NA	NA	NA	NA	-0.001330402	-0.000117193	-0.011545518	0.016731425	-0.011909479	Rocha et al. 2000, Sinervo et al. 2010, Menezes and Rocha 2011, Rocha et al. 2009, Sales and Freire 2015
Glaucomastix venetacauda	NA	87	1.284904876	NA	NA	NA	NA	NA	NA	NA	NA	-0.002156465	-0.1098709	0.004103533	0.037482437	-0.006627257	Arias et al. 2011
Gonatodes superciliaris	NA	49	0.461882358	NA	NA	NA	NA	28.85036114	29.81242568	40.76016061	9.85520035	-0.002311199	0.016044178	-0.007051219	0.026031294	-0.008209779	Barrio-Amoros and Brewer-Carias 2008
Gongylomorphus bojerii	NA	72	0.872326631	NA	NA	NA	NA	29.81458816	31.02990819	42.46933108	9.558780729	NA	NA	NA	NA	NA	Vinson and Vinson 1969, Bullock et al. 1985, Case et al. 1998, Ross et al. 2008, Bullock 1986
Gymnophthalmus cryptus	NA	28	-0.399484181	NA	NA	NA	NA	29.95432233	31.32789179	41.58128021	12.20332714	-0.002465076	-0.010020363	-0.002590729	0.030930168	-0.007094584	Cole et al. 1993
Gymnophthalmus marconaterai	NA	39.4	0.090328524	NA	NA	NA	NA	NA	NA	NA	NA	-0.002380163	-0.062115508	0.004745188	0.037803146	-0.005888135	Garcia-Perez and Schargel 2017
Gymnophthalmus pleei	NA	51	0.460396721	NA	NA	NA	NA	30.26889381	31.18172813	41.62901938	10.31384616	NA	NA	NA	NA	NA	Cole et al. 1990, Schwartz and Henderson 1991, Breuil 2002, Henderson and Powell 2009, Turk et al. 2010, Daltry 2009, Daniells et al. 2008
Gymnophthalmus underwoodi	NA	48	0.373458566	NA	NA	NA	NA	30.2370891	31.19650599	41.62419271	10.50488191	-0.002410794	0.006280932	-0.005076292	0.028491408	-0.007310363	Cole et al. 1990, Avila-Pires 1995, Pianka and Vitt 2003, Schwartz and Henderson 1991, Hoogmoed 1973, Vitt and Zani 1998, Vitt and Zani 1998, Daudin and de Silva 2007, Murphy 1997, Huey et al. 2001, Bartlett and Bartlett 2003, Telford 1971, Malhotra and Thorpe 1999, Breuil 2002, Henderson and Powell 2009, Avila-Pires et al. 2010, Turk et al. 2010, Gasc 1990, Daniels et al. 2008, Ribeiro-Junior an…
Gymnophthalmus vanzoi	NA	43	0.21571284	NA	NA	NA	NA	30.17938075	31.22331981	41.61543493	10.85150845	-0.002311199	0.016044178	-0.007051219	0.026031294	-0.008209779	de Carvalho 1997, Ribeiro-Junior and Amaral 2017
Harrisoniascincus zia	NA	59	0.593081146	NA	NA	NA	NA	30.26978352	29.89923996	40.97085305	4.959517446	-0.001961615	-0.027931071	-0.00544203	0.023553329	-0.010903567	Cogger 2000, Wilson and Swan 2003, Greer 2005, Wilson and Swan 2008, Kohler 2005, Swan et al. 2017
Heliobolus lugubris	38.6	65	0.806907315	NA	NA	NA	NA	38.6	36.3271529	44.67971201	8.384950131	-0.001227335	-0.138287182	-0.001251188	0.02219507	-0.00780148	Huey and Pianka 1981, FitzSimons 1943, Branch 1998, Pianka 1986, Pianka and Vitt 2003, Broadley 1971, Auerbach 1987, Nagy et al. 1999, McBrayer 2004, Brown and Nagy 2007, Vitt and Price 1982, Huey et al. 2001, Amat 2008, Sinervo et al. 2010, Pienaar 1966, Goldberg 2006, Huey and Pianka 2007, Huey and Pianka 1977, Verwaijen and Van Damme 2007, Mesquita et al. 2016, Schleicher 2015, Branch 2016, Bu…
Heliobolus nitidus	NA	66.7	0.839995336	NA	NA	NA	NA	37.77069999	35.82777351	44.40804112	8.29386138	-0.001307156	-0.117450793	0.001331508	0.026477557	-0.005956891	Papenfuss 1969, Dunger 1967, Schmidt et al. 1919, Chirio and LeBreton 2007, Trape et al. 2012, Dubke et al. 2018
Heliobolus spekii	36.8	60	0.70432434	NA	NA	NA	NA	36.8	35.31033218	44.10110579	8.571859141	-0.001109131	-0.151078122	0.00123129	0.026702789	-0.007247904	Fitch 1970, Spawls et al. 2002, Loveridge 1936, Parker 1932, Parker 1942, Vanhooydonck and Van Damme 1999, Branch 2005, Sinervo et al. 2010, Largen and Spawls 2010, Bowker 1984, Damuth 1987, Western 1974, Branch 2014, Dubke et al. 2018
Holbrookia approximans	NA	72	1.117079093	NA	46.5	NA	NA	39.01199679	38.08530715	46.5	12.74511518	-0.000841281	-0.15821882	-0.000803343	0.02266907	-0.009852534	Lemos-Espinal and Smith 2007, Lemos-Espinal et al. 2013, Rorabaugh and Lemos-Espinal 2016, Lemos-Espinal et al. 2015
Holbrookia elegans	36.8	75	1.164539002	NA	NA	NA	NA	36.8	36.50037045	44.97968662	12.03551139	-0.000985643	-0.126461677	-0.001847236	0.020211224	-0.009428829	Brennan and Holycross 2009, Jones and Lovich 2009, Lemos-Espinal et al. 2013, Albuquerque et al. 2015, Rorabaugh and Lemos-Espinal 2016
Holbrookia lacerata	NA	71	1.1008186	NA	NA	NA	NA	37.93625453	37.09003115	45.05107459	11.9902826	-0.001130225	-0.101205953	-0.000622847	0.028804271	-0.009657917	Fitch 1970, Conant and Collins 1998, Rogner 1997a, Axtell 1956, Lemos-Espinal and Smith 2007, Kohler 2005, Aguirre and Gatica 2010, Hibbitts and Hibbitts 2015, Young 2011
Holbrookia maculata	39.5	75	1.164539002	NA	NA	NA	NA	39.5	38.13638644	46.01067405	12.20140528	-0.000867074	-0.047974745	-0.006371795	0.01836616	-0.013071713	Tinkle et al. 1970, Clobert et al. 1998, Dunham and Miles 1985, Fitch 1970, 1985, Vitt et al. 1978, Melville et al. 2006, Perry and Garland 2002, Conant and Collins 1998, Stebbins 2003, Degenhardt et al. 1996, Smith 1946, Greene 1982, Schmidt 1921, Axtell 1956, Judd 1976, Van Denburgh 1922, McCranie and Wilson 2001, Clusella-Trullas et al. 2008, Vitt and Price 1982, Warne and Charnov 2008, Hardy …
Holbrookia propinqua	37.9	62	0.943232553	NA	NA	NA	NA	37.9	37.28259829	45.50460701	12.65451252	-0.001130225	-0.101205953	-0.000622847	0.028804271	-0.009657917	Clobert et al. 1998, Dunham and Miles 1985, Fitch 1985, Cox et al. 2003, Conant and Collins 1998, Smith 1946, Cooper and Guillette 1991, Judd 1976, Judd and Ross 1978, Dunham et al. 1988, Cooper et al. 2001, Judd 1975, Axtell 1983, Sinervo et al. 2010, Kohler 2005, Cooper et al. 2013, Mesquita et al. 2016, Hibbitts and Hibbitts 2015
Holcosus bridgesii	NA	120	1.719253675	NA	NA	NA	NA	36.33603624	34.38628048	44.18863975	10.09720035	-0.00161255	-0.009353383	-0.004595534	0.024463522	-0.009768894	Castro-Herrera et al. 2012
Holcosus chaitzami	NA	85	1.253492859	NA	NA	NA	NA	36.16564628	34.4654511	44.16278148	11.12065162	-0.001689936	0.027808051	-0.007383977	0.022256729	-0.009721326	Campbell 1999, Lee 2000
Holcosus festivus	37.7	144	1.96550735	NA	43.7	15.5	NA	37.7	33.88771629	43.7	15.5	-0.001565302	0.00929685	-0.006172855	0.022612407	-0.009261589	Tinkle et al. 1970, Dunham and Miles 1985, Fitch 1970, 1973, 1985, Campbell 1999, Stafford and Meyer 2000, Savage 2002, Lee 2000, Cox et al. 2003, Vitt and de Carvalho 1992, Kohler 2003, Rand and Myers 1990, Duellman 1990, McCranie and Castaneda 2005, Guyer and Donnelly 2005, Toledo et al. 2007, Hillman 1969, Dunham et al. 1988, Vitt and Zani 1996, Vitt and Zani 1998, Huey et al. 2001, Kohler 200…
Holcosus leptophrys	37.2	133	1.858178603	NA	NA	NA	NA	37.2	34.03684793	44.27419174	15.09598936	-0.001440667	-0.009214351	-0.004961733	0.022968085	-0.008801853	Savage 2002, Kohler 2003, Duellman 1990, Evans 1947, Hillman 1969, Campbell 1973, Echternacht 1983
Holcosus niceforoi	NA	82	1.204961081	NA	NA	NA	NA	36.14789183	34.47370059	44.16008707	11.22729415	-0.001508426	0.096059669	-0.013767396	0.014293675	-0.012269376	Dunn 1943, Echternacht 1970
Holcosus orcesi	NA	105.6	1.546594786	NA	NA	NA	NA	36.27287219	34.41562926	44.17905402	10.47659671	-0.001460572	0.006975762	-0.006811861	0.021723515	-0.010774191	Peters 1964
Holcosus quadrilineatus	37.6	88	1.30034111	NA	45.1	NA	NA	37.6	34.58814417	45.1	17.67534503	-0.001440667	-0.009214351	-0.004961733	0.022968085	-0.008801853	Tinkle et al. 1970, Dunham and Miles 1985, Fitch 1970, 1973, Perry and Garland 2002, Savage 2002, Vitt and de Carvalho 1992, Kohler 2003, Duellman 1990, Hillman 1969, Dunham et al. 1988, Somma and Brooks 1976, Smith 1968, Sinervo et al. 2010, Turner 1977, Damuth 1987, Curry-Lindahl 1979, Tinkle 1967, Hirth 1963, Brattstrom 1965, Hirth 1965, Sebastian-Gonzalez and Gomez 2012, Mesquita et al. 2016
Holcosus undulatus	39.6	138	1.908023959	NA	NA	NA	NA	39.6	36.22903508	45.23765937	9.752199498	-0.001329721	0.063478057	-0.011218885	0.014103056	-0.011459275	Fitch 1970, 1973, 1985, Campbell 1999, Stafford and Meyer 2000, Savage 2002, Lee 2000, Vitt and de Carvalho 1992, Kohler 2003, Echternacht 1970, McCranie and Castaneda 2005, Kohler et al. 2006, Duellman 1961, Rand 1957, Kohler 2008, Echternacht 1983, Davis and Dixon 1961, Kohler 2005, Duellman 1965, Duellman 1965b, Dixon and Lemos-Espinal 2010, Leenders and Watkins-Colwell 2004, Lemos-Espinal and…
Hoplocercus spinosus	NA	105	1.521716897	NA	NA	NA	NA	29.6910755	30.32659298	40.97700975	8.583822629	-0.002342549	-0.030579932	-0.002899745	0.030463754	-0.008165665	Avila-Pires 1995, Colli et al. 2002, Kohler 2005, Torres-Carvajal et al. 2011
Hyalosaurus koellikeri	18	183.3	1.385274451	NA	NA	NA	NA	NA	NA	NA	NA	-0.00072786	-0.185182423	-0.000459309	0.021089692	-0.010085297	Schleich et al. 1996, Bons and Geniez 1996, Wiens et al. 2006
Iberolacerta cyreni	29.4	91	1.238131149	33.5	43.6	NA	NA	29.4	31.66033192	42.36237115	6.284085503	-0.000923643	0.104217015	-0.016102696	0.008497496	-0.01714915	Salvador et al. 2008, Amo et al. 2007, Martin 2008, Kwet 2009, Amat 2008, Siliceo and Diaz 2010, Monasterio et al. 2009, Maso and Pijoan 2011, Carbonero et al. 2016, Monasterio et al. 2016, Kwet 2015
Ichnotropis bivittata	NA	78	1.040571173	NA	NA	NA	NA	34.60368367	33.92515618	43.46395008	7.850730705	-0.002867962	-0.046929438	-0.002507012	0.032727699	-0.008131083	Spawls et al. 2002, Parker 1936, Branch 2005, Branch 2014, Ineich and Le Garff 2015
Ichnotropis capensis	NA	68	0.864733801	NA	NA	NA	NA	34.53935683	33.95504524	43.45418788	8.237111387	-0.001818641	-0.104797377	-0.002520934	0.025663206	-0.008494449	Clobert et al. 1998, Fitch 1970, Branch 1998, Broadley 1971, Vanhooydonck and Van Damme 1999, Rogner 1997b, Loveridge 1953, Auerbach 1987, Alexander and Marais 2007, Jacobsen et al. 2010, Pienaar 1966, Haagner et al. 2000, Jacobsen 1982, Branch and McCartney 1992, Pietersen 2014, Broadley 1962
Ichnotropis grandiceps	NA	70	0.901884316	NA	NA	NA	NA	34.55294766	33.94873035	43.45625041	8.155477766	-0.001557104	-0.12289881	-0.001490458	0.024435696	-0.007276914	Branch 1998, Auerbach 1987, Alexander and Marais 2007
Iphisa elegans	30.8	63	0.763422494	NA	NA	NA	NA	30.8	31.37683142	41.78244972	9.657165926	-0.002139659	0.006087862	-0.005397444	0.026764889	-0.00817299	Wiens et al. 2006, Avila-Pires 1995, Duellman 1978, Beebe 1945, Duellman 1990, Pianka and Vitt 2003, Dixon and Soini 1986, Hoogmoed 1973, Bartlett and Bartlett 2003, Vitt and Zani 1996b, Bartlett and Bartlett 2003, Kohler 2005, Avila-Pires et al. 2010, Duellman 1987, Gasc 1990, Torres-Carvajal and Salazar-Valenzuela 2013, Vitt et al. 2008, Mesquita et al. 2016, Ribeiro-Junior and Amaral 2017, Mor…
Iranolacerta brandtii	NA	76.4	1.014008501	NA	NA	NA	NA	32.08738682	32.910461	42.87510308	6.658139224	-0.001016183	-0.083343974	-0.006137333	0.017926219	-0.011649457	Anderson 1999, Arnold 1998, Nilson et al. 2003, Ahmadzadeh et al. 2008, Rezazadeh et al. 2010, Avci et al. 2015, Yildiz and Igci 2015, Rato et al. 2015, Gul et al. 2017
Japalura iadina	NA	65	0.943095972	NA	NA	NA	NA	NA	NA	NA	NA	-0.002737429	-0.045395463	-0.002989105	0.031454107	-0.007780272	Wang et al. 2016
Japalura laeviventris	NA	72	1.081017401	NA	NA	NA	NA	NA	NA	NA	NA	-0.00071175	0.26493299	-0.018676036	0.001552343	-0.015204103	Wang et al. 2016
Kaestlea bilineata	NA	65	0.728897229	NA	NA	NA	NA	29.79854692	30.45530009	41.05949874	8.709423195	-0.001991628	-0.113443304	0.000235997	0.030854142	-0.0081023	Tikader and Sharma 1992, Ouboter 1986, Srinivasulu et al. 2014
Kaestlea laterimaculata	NA	49.8	0.355353548	NA	NA	NA	NA	29.6618929	30.51879552	41.03876021	9.530238822	-0.001991628	-0.113443304	0.000235997	0.030854142	-0.0081023	Tikader and Sharma 1992, Eremchenko and Das 2004, Das 2002, Chandramouli and Ganesh 2011, Ganesh and Shankar 2009, Srinivasulu et al. 2014
Kaestlea palnica	NA	56.2	0.524898563	NA	NA	NA	NA	29.72391779	30.48997604	41.04817307	9.157684807	-0.001991628	-0.113443304	0.000235997	0.030854142	-0.0081023	Das 2002, Srinivasulu et al. 2014
Kaestlea travancorica	NA	63	0.685070634	NA	NA	NA	NA	29.78251378	30.46274979	41.05706556	8.805726667	-0.001991628	-0.113443304	0.000235997	0.030854142	-0.0081023	Tikader and Sharma 1992, Chandramouli and Ganesh 2011, Srinivasulu et al. 2014
Kentropyx borckiana	NA	101	1.486439472	NA	NA	NA	NA	37.86780791	35.47553043	44.92919348	10.38918188	-0.002698201	0.003313854	-0.00529734	0.029780033	-0.007082158	Zug et al. 2001, Pianka and Vitt 2003, Schwartz and Henderson 1991, Hoogmoed 1973, Gallagher and Dixon 1992, Malhotra and Thorpe 1999, Werneck et al. 2009, Henderson and Powell 2009, Mesquita et al. 2016, Ortiz et al. 2016
Kentropyx paulensis	NA	77	1.119986155	NA	NA	NA	NA	36.47305794	34.79801968	44.49904743	11.16687535	-0.002169662	-0.037426725	-0.00627131	0.025785142	-0.010075346	Pianka and Vitt 2003, Gallagher and Dixon 1992, Colli et al. 2002, Werneck et al. 2009, Winck and Rocha 2012, Mesquita et al. 2016, Ortiz et al. 2016
Kentropyx vanzoi	NA	85	1.253492859	NA	NA	NA	NA	36.5218989	34.77532604	44.5064595	10.87351103	-0.00234049	-0.025334136	-0.002947087	0.03031664	-0.008336927	Vitt and Caldwell 1993, Pianka and Vitt 2003, Gainsbury and Colli 2003, Gallagher and Dixon 1992, Gallagher and Dixon 1980, Werneck et al. 2009, Mesquita et al. 2016, Ortiz et al. 2016, Ribeiro-Junior and Amaral 2016
Kentropyx viridistriga	NA	107	1.564383549	NA	NA	NA	NA	36.63563249	34.72248045	44.52371964	10.19036753	-0.001986882	-0.002837082	-0.004607931	0.026701836	-0.009361252	Fitzgerald et al. 1999, Pianka and Vitt 2003, Cei 1993, Gallagher and Dixon 1992, Werneck et al. 2009, Cano and Leynaud 2010, Truntau et al. 2016, Ortiz et al. 2016
Lacerta agilis	34.6	114	1.526926216	34.5	43.9	5.9	NA	34.6	34.5	43.9	5.9	-0.00065839	0.091746846	-0.016497648	0.006418052	-0.017159128	Tinkle et al. 1970, Clobert et al. 1998, Fitch 1970, Bauwens and Diaz-Uriarte 1997, Arnold and Ovenden 2004, Szczerbak 2003, Perry and Garland 2002, Baran and Atatur 1998, Spellerberg 2002, Arnold 1987, Street 1979, Rogner 1997b, Sindaco et al. 2006, Corti and Cascio 2002, Valakos et al. 2008, Terbish et al. 2006, Amat 2008, Warne and Charnov 2008, Strijbosch 1986, Korsos 1986, Roitberg 2007, AL-…
Lacerta bilineata	NA	130	1.695246833	31.7	NA	NA	NA	31.86968145	31.7	42.49515523	5.266328457	-0.00093446	0.116567569	-0.01773352	0.007425736	-0.017399695	Arnold and Ovenden 2004, Sindaco et al. 2006, Corti and Cascio 2002, Verwaijen and Van Damme 2008, Kwet 2009, Amat 2008, Siliceo and Diaz 2010, Sindaco et al. 2010, Maso and Pijoan 2011, Speybroeck et al. 2016, Kwet 2015
Lacerta schreiberi	31.1	135	1.743614951	35.5	43	NA	NA	31.1	35.5	43	4.526249751	-0.00098229	0.061625069	-0.013891687	0.011782461	-0.016363524	Bauwens and Diaz-Uriarte 1997, Arnold and Ovenden 2004, Perry and Garland 2002, Arnold 1987, Rogner 1997b, Verwaijen and Van Damme 2008, Marco 2008, Kwet 2009, Malkmus 2004, Amat 2008, Salvador 1984, Kohler 2005, Siliceo and Diaz 2010, Bauwens 1999, Norrie and Langerwerf 1987, Martin and Lopez 2010, Verwaijen and Van Damme 2007, Maso and Pijoan 2011, Monasterio et al. 2013, Luis et al. 2004, Spey…
Lacerta strigata	NA	160	1.961358069	NA	NA	NA	NA	32.04059441	33.39453954	42.91639777	4.509144145	-0.001193899	0.078409432	-0.012106792	0.01146582	-0.014694525	Szczerbak 2003, Anderson 1999, Baran and Atatur 1998, Darewskij 1984, Kohler 2005, Arakelyan et al. 2011, Roitberg and Smirina 2006, Ataev et al. 1994, Hallmann and Griebeler 2015, Hojati et al. 2016
Lacertaspis rohdei	NA	62	0.662632765	NA	NA	NA	NA	29.79753999	29.66015549	40.82728173	6.115340823	-0.002295875	-0.014617872	-0.008808494	0.024818336	-0.008816369	Fuhn 1972, Chirio and LeBreton 2007, Pauwels and Vande weghe 2008, Gonwouo et al. 2007
Lampropholis adonis	NA	53	0.442686783	NA	NA	NA	NA	30.0961133	29.87272488	40.95172331	5.116880894	-0.001621663	-0.064217989	-0.004403507	0.023103073	-0.010342306	Cogger 2000, Wilson and Swan 2003, Greer 2005, Greer 1997, Swanson 2007, Brown 2012
Lampropholis amicula	NA	35	-0.139204285	NA	NA	NA	NA	29.88323925	29.97163547	40.91941768	6.395513906	-0.001961615	-0.027931071	-0.00544203	0.023553329	-0.010903567	Cogger 2000, Wilson and Swan 2003, Greer 1989, Greer 1997, Kohler 2005, Swan et al. 2017
Lampropholis caligula	NA	54	0.46889945	NA	NA	NA	NA	30.10570272	29.86826921	40.95317859	5.059281828	NA	NA	NA	NA	NA	Cogger 2000, Wilson and Swan 2003, Wilson and Swan 2008, Greer 1997, Swan et al. 2017
Lampropholis coggeri	NA	45	0.213223207	NA	NA	NA	NA	30.01216831	29.91172939	40.93898387	5.621098469	-0.001117477	-0.142076506	0.001160608	0.025853415	-0.007353611	Cogger 2000, Wilson and Swan 2003, Goodman 2007, Greer 1997, Goodman et al. 2009, Ingram 1991, Munoz et al. 2016
Lampropholis colossus	NA	56	0.519899139	NA	NA	NA	NA	30.12436001	29.85960022	40.95601001	4.947216376	-0.001961615	-0.027931071	-0.00544203	0.023553329	-0.010903567	Cogger 2000, Wilson and Swan 2003, Greer 2005, Greer 1997
Lampropholis couperi	NA	49	0.332643142	NA	NA	NA	NA	30.05585588	29.89143024	40.94561387	5.358688063	-0.001961615	-0.027931071	-0.00544203	0.023553329	-0.010903567	Cogger 2000, Wilson and Swan 2003, Greer 2005, Ingram 1991
Lampropholis delicata	26.1	55	0.494631124	26.1	40.8	4.7	68.38	26.1	26.1	40.8	4.7	-0.001143487	0.100352337	-0.016346816	0.009591542	-0.015636976	Shine and Greer 1991, Cogger 2000, Wilson and Swan 2003, Greer 1989, Greer 2005, Cree 1994, Towns 1994, Dunham et al. 1988, Shine 1983, James and Shine 1988, Greer 1997, Burgin 1992, Fischer and Lindenmayer 2005, Goodman et al. 2009, Jewell 2008, Hoser 2009, Kohler 2005, Michael and Lindenmayer 2010, Heatwole and Taylor 1987, Swanson 2007, Swan and Watharow 2005, Hutchinson et al. 2001, Brown 201…
Lampropholis elongata	NA	53	0.442686783	NA	NA	NA	NA	30.0961133	29.87272488	40.95172331	5.116880894	NA	NA	NA	NA	NA	Cogger 2000, Wilson and Swan 2003, Greer 2005, Wilson and Swan 2008, Greer 1997, Brown 2012, Swan et al. 2017
Lampropholis guichenoti	33.8	52	0.415974797	33.7	41.3	2.5	NA	33.8	33.7	41.3	2.5	-0.001108724	0.073544545	-0.014586109	0.011400864	-0.015058498	Fitch 1970, Shine and Greer 1991, Cogger 2000, Brown 1991, Wilson and Swan 2003, Greer 1989, Greer 2005, Shine 1983, Vitt and Price 1982, Qualls and Shine 1998, James and Shine 1988, Greer 1997, Burgin 1992, Todd 2008, Taylor 1985, Fischer and Lindenmayer 2005, Simbotwe 1985, Kohler 2005, Michael and Lindenmayer 2010, Hutchinson 1993, Swanson 2007, Michael et al. 2011, Brown 2012, Downes and Shin…
Lampropholis robertsi	NA	55	0.494631124	NA	NA	NA	NA	30.11511618	29.86389531	40.95460717	5.002739686	-0.001117477	-0.142076506	0.001160608	0.025853415	-0.007353611	Cogger 2000, Wilson and Swan 2003, Greer 2005, Goodman and Isaac 2008, Goodman 2007, Greer 1997, Goodman et al. 2009, Kutt et al. 2011, Munoz et al. 2016
Lankascincus greeri	NA	58.5	0.581146292	NA	NA	NA	NA	28.65693423	29.79416137	40.72528638	9.139462453	NA	NA	NA	NA	NA	Batuwita and Pethiyagoda 2007, Somaweera and Somaweera 2009
Lankascincus munindradasai	NA	45	0.213223207	NA	NA	NA	NA	28.5223364	29.85670141	40.7048599	9.947927522	NA	NA	NA	NA	NA	Wickramasinghe et al. 2007, Somaweera and Somaweera 2009, de Silva and Ukuwela 2017
Latastia doriai	NA	87.3	1.184933033	NA	NA	NA	NA	35.58962131	34.41518429	43.67718861	7.485497538	-0.001185838	-0.131269237	-0.001923272	0.020854058	-0.006841319	Ineich 1999, Largen and Spawls 2010
Latastia johnstonii	NA	64.1	0.789038045	NA	NA	NA	NA	35.44479047	34.48247903	43.65520917	8.355427374	-0.00223337	-0.082815541	-0.001576972	0.030776397	-0.009059226	Spawls et al. 2002, Broadley 1971, Loveridge 1953, Branch 2005, Loveridge 1955, Branch et al. 2005, Haagner et al. 2000, Branch 2014
Latastia longicaudata	37.8	110	1.481149814	NA	NA	NA	NA	37.8	35.59834134	44.37691673	6.880520277	-0.000786533	-0.132910612	0.000295409	0.020342434	-0.006517856	Fitch 1970, Spawls et al. 2002, Loveridge 1936, Flower 1933, Papenfuss 1969, Parker 1932, Dunger 1967, El Din 2006, Parker 1942, Schatti and Desvoignes 1999, Le Berre 1989, Branch 2005, Chirio and LeBreton 2007, Ineich 1999, Malonza et al. 2006, Largen and Spawls 2010, Bowker 1984, Damuth 1987, Western 1974, Cisse and Karns 1978, Trape et al. 2012, Loveridge 1920, Branch 2014,
Leiocephalus carinatus	35.6	133.2	1.856767201	NA	NA	NA	NA	35.6	33.30675382	42.02058454	7.476207207	NA	NA	NA	NA	NA	Conant and Collins 1998, Schoener et al. 1982, Cooper and Vitt 2002, Schettino 1999, Smith 1946, Schwartz and Henderson 1991, Rogner 1997a, Cope 1895, Kavaliers et al. 1984, Kohler 2005, Henderson and Powell 2009, Losos 2009, Van Wilgen and Richardson 2012, Diamond et al. 2015, Torres et al. 2014, Mesquita et al. 2016, Kircher et al. 2014
Leiocephalus cubensis	NA	121	1.721472956	NA	NA	NA	NA	34.78471691	32.88036968	41.76414531	7.756769447	NA	NA	NA	NA	NA	Schettino 1999, Schwartz and Henderson 1991, Henderson and Powell 2009
Leiocephalus cuneus	NA	200	2.429240276	NA	NA	NA	NA	36.06721156	33.36071688	42.13616248	6.223900777	NA	NA	NA	NA	NA	Breuil 2002, Henderson and Powell 2009
Leiocephalus inaguae	NA	90	1.304608458	NA	NA	NA	NA	36.10007393	33.8126014	42.21814552	8.704845112	NA	NA	NA	NA	NA	Schoener et al. 1982, Cooper and Vitt 2002, Schwartz and Henderson 1991, Noble and Klingel 1932, Henderson and Powell 2009
Leiocephalus loxogrammus	NA	92	1.335563924	NA	NA	NA	NA	36.63382792	34.11391285	42.38968561	8.648237723	NA	NA	NA	NA	NA	Schoener et al. 1982, Schwartz and Henderson 1991, Henderson and Powell 2009, Hillbrand et al. 2011, Dlugolecki et al. 2015
Leiocephalus melanochlorus	NA	130	1.822518292	NA	NA	NA	NA	33.16971944	31.89378505	41.23276633	7.498644912	NA	NA	NA	NA	NA	Schwartz and Henderson 1991, Schwartz1968, Henderson and Powell 2009
Leiocephalus onaneyi	NA	73	1.009756035	NA	NA	NA	NA	35.99220764	33.86272079	42.2017758	9.352746518	NA	NA	NA	NA	NA	Schettino 1999, Schwartz and Henderson 1991, Henderson and Powell 2009, Diaz and Cadiz 2012
Leiocephalus raviceps	NA	74.1	1.030820448	NA	NA	NA	NA	34.5320545	32.99776768	41.72580142	9.274392151	NA	NA	NA	NA	NA	Schettino 1999, Schwartz and Henderson 1991, Henderson and Powell 2009
Leiocephalus sixtoi	NA	88	1.272957306	NA	NA	NA	NA	NA	NA	NA	NA	NA	NA	NA	NA	NA	Kohler et al. 2016
Leiocephalus stictigaster	34.6	100	1.453	NA	NA	NA	NA	34.6	32.8752443	41.721122	8.3448155	NA	NA	NA	NA	NA	Schettino 1999, Schwartz and Henderson 1991, Henderson and Powell 2009, Mesquita et al. 2016
Leiocephalus varius	NA	107	1.548291591	NA	NA	NA	NA	NA	NA	NA	NA	NA	NA	NA	NA	NA	Schwartz and Henderson 1991
Leiolepis belliana	NA	177.8	2.300038104	NA	NA	NA	NA	31.88156398	31.6853744	42.03370454	6.005822232	-0.002381842	-0.022061759	-0.003494773	0.029325412	-0.007408497	Smith 1935, Wiens et al. 2006, Taylor 1963, Boulenger 1890, Manthey and Grossmann 1997, de Rooij 1915, Rogner 1997a, Cox et al. 1998, Inger and Colwell 1977, Peters 1971, Manthey and Schuster 1996, Pauwels et al. 2003, Taylor and Elbel 1958, Manthey 2010, Das 2010, Cox et al. 2010, Grismer 2011, Zoffer 1996, Chan-ard et al. 2015, Pauwels et al. 2000, Goldberg and Grismer 2015
Leiolepis boehmei	NA	126	1.835650543	NA	NA	NA	NA	31.71167641	31.7643116	42.00792251	7.026255952	NA	NA	NA	NA	NA	Zug et al. 2001, Darevsky and Kupriyanova 1993, Manthey 2010, Das 2010, Chan-ard et al. 2015
Leiolepis guentherpetersi	NA	156	2.123651878	NA	NA	NA	NA	31.81703635	31.71535676	42.02391187	6.393408955	NA	NA	NA	NA	NA	Zug et al. 2001, Darevsky and Kupriyanova 1993, Manthey 2010, Das 2010
Leiolepis guttata	NA	250	2.759603727	NA	NA	NA	NA	32.04968754	31.60725685	42.05921887	4.995984122	-0.002144474	0.00594797	-0.009641027	0.022684613	-0.008669123	Zug et al. 2001, Kohler 2005, Manthey 2010, Das 2010, Hartmann et al. 2011, Geissler et al. 2011
Leiolepis ngovantrii	NA	126.5	1.840991082	NA	NA	NA	NA	31.71363014	31.76340381	42.00821901	7.014520784	-0.00177487	0.012689158	-0.010984622	0.018367305	-0.010206141	Grismer and Grismer 2010
Leiolepis peguensis	NA	162	2.17454412	NA	NA	NA	NA	31.83565434	31.70670603	42.02673732	6.281579603	-0.002815957	-0.021733834	-0.003454256	0.031445008	-0.007024665	Zug et al. 2001, Zug et al. 1998, Manthey 2010
Leiolepis reevesii	NA	190	2.389529931	NA	NA	NA	NA	31.91430291	31.67016247	42.03867298	5.80917511	-0.002020517	0.000442738	-0.006354244	0.026051156	-0.009911027	Zug et al. 2001, Taylor 1963, Cox et al. 1998, Manthey 2010, Das 2010, Cox et al. 2010, Du et al. 2011, Teynie and David 2010, Lin et al. 2007, Chan-ard et al. 2015
Leiolepis rubritaeniata	NA	166	2.207435613	NA	NA	NA	NA	31.84768708	31.70111509	42.02856341	6.209304651	-0.002020517	0.000442738	-0.006354244	0.026051156	-0.009911027	Hartmann et al. 2012, Hartmann et al. 2013
Leiolepis triploida	NA	148	2.052662626	NA	NA	NA	NA	31.79106625	31.7274236	42.01997066	6.549398977	-0.002274443	-0.014574302	-0.004093168	0.028528876	-0.007273811	Zug et al. 2001, Manthey and Grossmann 1997, Peters 1971, Manthey 2010, Das 2010, Grismer 2011
Leiosaurus bellii	NA	110	1.62227981	NA	NA	NA	NA	29.01259724	29.27483808	40.49592794	8.18343977	-0.000585884	-0.080036258	-0.006182669	0.015629895	-0.013446012	Cei 1986, Cei 1993, Laspiur et al. 2007, Scolaro 2005, Kohler 2005, Tuli et al. 2009
Leiosaurus catamarcensis	NA	120	1.750345243	NA	NA	NA	NA	29.0594476	29.25306936	40.50303793	7.902031962	-0.001268482	-0.07386849	-0.005161788	0.018883011	-0.01134958	Cei 1986, Cei 1993, Laspiur et al. 2007, Tuli et al. 2009, Sanabria et al. 2010
Leiosaurus paronae	NA	110	1.62227981	NA	NA	NA	NA	29.01259724	29.27483808	40.49592794	8.18343977	-0.001422608	-0.071033565	-0.004506097	0.020928536	-0.010947455	Cei 1986, Cei 1993, Laspiur et al. 2007, Tuli et al. 2009, Ales et al. 2017
Lepidoblepharis conolepis	NA	44	0.323054449	NA	NA	NA	NA	28.90970239	29.9006499	40.78825172	10.16266331	-0.001460572	0.006975762	-0.006811861	0.021723515	-0.010774191	Uetz 2006, Avila-Pires 2001, Arteaga et al. 2013, Alvear and Puig 2016
Lepidoblepharis festae	NA	47	0.408130638	NA	NA	NA	NA	28.94082593	29.88618854	40.79297501	9.975719004	-0.002010436	-0.000979723	-0.005366022	0.026367137	-0.008100364	Dixon and Soini 1986, Torres-Carvajal and Salazar-Valenzuela 2013
Lepidoblepharis miyatai	NA	23	-0.513668327	NA	NA	NA	NA	28.60360288	30.04287711	40.74179825	12.00125721	NA	NA	NA	NA	NA	Lamar 1985, Fernando Castro Hererra, pers. Comm. April 2017
Lepidoblepharis nukak	NA	29.3	-0.201403168	NA	NA	NA	NA	NA	NA	NA	NA	-0.002230473	-0.004050217	-0.005278335	0.027094414	-0.00822027	Calderon-Espinosa and Medina-Rangel 2016
Lepidoblepharis peraccae	NA	29	-0.214677946	NA	NA	NA	NA	28.71298297	29.99205434	40.7583977	11.34426315	-0.001602598	-0.017448439	-0.00367047	0.025085807	-0.008782725	Uetz 2006, Castro-Herrera et al. 2012
Lepidoblepharis ruthveni	NA	46	0.38039076	NA	NA	NA	NA	28.93067781	29.8909038	40.79143494	10.03667392	-0.00161255	-0.009353383	-0.004595534	0.024463522	-0.009768894	Ortega-Andrade et al. 2010, Castro-Herrera et al. 2012
Lepidoblepharis sanctaemartae	NA	35	0.027882092	NA	NA	NA	NA	28.80171906	29.95082368	40.77186424	10.81126774	-0.001485839	0.060968329	-0.010832175	0.017185145	-0.011113535	Kohler 2003, Rand and Myers 1990, Duellman 1990, Kohler 2008, Rivas-Fuenmayor et al. 2002
Lepidoblepharis xanthostigma	NA	45	0.352041166	NA	NA	NA	NA	28.92030664	29.8957227	40.78986101	10.09896862	-0.001440667	-0.009214351	-0.004961733	0.022968085	-0.008801853	Vitt et al. 2005, Savage 2002, Fitch 1973, Duellman 1990, Ayala and Castro 1983, Guyer and Donnelly 2005, Villa 1971, Vitt and Zani 1998, Watling et al. 2005, Dunn 1940, Daza et al. 2009, Whitfield et al. 2007, Mesquita et al. 2016, Goldberg 2008
Lepidothyris hinkeli	NA	146	1.863695371	NA	NA	NA	NA	31.0389635	30.33756802	41.28374568	4.918385757	-0.00280352	0.00421958	-0.00943489	0.026329566	-0.008443457	Wagner et al. 2009, Branch 2014
Lepidothyris striatus	NA	166.5	2.047946574	NA	NA	NA	NA	31.10636839	30.30624877	41.293975	4.51351673	-0.002295875	-0.014617872	-0.008808494	0.024818336	-0.008816369	Wagner et al. 2009
Leposoma puk	NA	41.8	0.175124082	NA	NA	NA	NA	29.10979814	30.61127769	41.27032858	10.91765468	-0.001879815	-0.037392943	-0.005017031	0.024971987	-0.010592136	Rodrigues et al. 2002
Leptosiaphos blochmanni	NA	55	0.494631124	NA	NA	NA	NA	29.7360797	29.68871263	40.81795456	6.484503466	-0.002622449	-0.001840756	-0.008128516	0.027425345	-0.00827944	Spawls et al. 2002, Loveridge 1942
Leptosiaphos kilimensis	NA	73	0.891669515	NA	NA	NA	NA	29.88132884	29.62122353	40.83999748	5.612061145	-0.002464069	-0.050836029	-0.004414122	0.029038883	-0.008604604	Spawls et al. 2002, Loveridge 1936, 1942, Perret 1975, Barbour and Loveridge 1928
Lerista frosti	NA	68	0.321129523	NA	42.9	NA	NA	31.31705667	31.79452902	42.9	10.23186189	-0.000650204	-0.134220791	-0.001730674	0.017640514	-0.009358308	Cogger 2000, Wilson and Swan 2003, Greer 1989, Horner 1999, Kohler 2005, Wells 2012
Lerista orientalis	NA	49	-0.030525486	NA	40.9	NA	NA	29.714507	30.48414838	40.9	9.925516648	-0.001239853	-0.158935354	0.002444238	0.028248501	-0.007040148	Cogger 2000, Wilson and Swan 2003, Wilson and Swan 2008, Storr et al. 1999, Horner 1999, Wells 2012
Lerista tridactyla	NA	61.3	0.209814833	NA	NA	NA	NA	32.53132549	32.98010304	44.5801457	11.39525704	-0.001061203	-0.165462265	-0.002278976	0.022901472	-0.013088551	Cogger 2000, Wilson and Swan 2003, Wells 2012
Lerista viduata	NA	45	0.213223207	NA	NA	NA	NA	30.38756993	30.87954528	42.654057	10.60703652	-0.001126843	-0.145360183	-0.002873666	0.022666082	-0.012547551	Cogger 2000, Wilson and Swan 2003, Storr et al. 1999
Liolaemus abaucan	34.7	65	0.936592666	NA	47.3	15.41	NA	34.7	34.69295382	47.3	15.41	-0.001458047	0.006852742	-0.007917979	0.013424155	-0.011431154	Cruz et al. 2005, Schulte et al. 2000, Pincheira-Donoso et al. 2008, Espinoza et al. 2004, Sinervo et al. 2010, Tuli et al. 2009, Cruz et al. 2011, Cruz et al. 2014
Liolaemus acostai	NA	76.7	1.159211242	NA	45.93	12.19	NA	34.79842291	34.43904041	45.93	12.19	-0.000989785	-0.162475872	-0.001004975	0.022486632	-0.009094651	Abdala and Heredia 2013
Liolaemus albiceps	36.2	94	1.432776963	NA	44.33	7.05	NA	36.2	34.90034662	44.33	7.05	-0.000410617	0.288616482	-0.020043389	0.001893796	-0.015378995	Schlute et al. 2004, Cruz et al. 2005, Schulte et al. 2000, Pincheira-Donoso et al. 2008, Tuli et al. 2009, Cruz et al. 2011, Valdecantos et al. 2013, Cruz et al. 2014, Piantoni et al. 2016, Semhan and Halloy 2016
Liolaemus alticolor	32.9	55.2	0.716785324	NA	NA	13.12	NA	32.9	33.13310996	44.50109819	13.12	-0.000735558	0.281510073	-0.023238686	0.000570569	-0.016278749	Schulte et al. 2000, Lobo and Espinoza 1999, Lobo and Espinoza 2004, Donoso-Barros 1966, Cei 1993, Boretto and Ibarguengoytia 2006, Pincheira-Donoso et al. 2008, Pincheira Donoso and Nunez 2005, Pinilla 1991, Espinoza et al. 2004, Sinervo et al. 2010, Pincheira-Donoso and Tregenza 2011, Rodrigues-Serrano et al. 2009, Ibarguengoytia 2008, Vidal and Labra 2008, Labra et al. 2008, Pincheira-Donoso, …
Liolaemus andinus	30.6	91	1.389151192	NA	44.16	9.35	NA	30.6	31.65439857	43.06444923	8.596265406	-0.000934332	0.147734612	-0.013980684	0.007658975	-0.013405075	Cruz et al. 2005, Schulte et al. 2000, Donoso-Barros 1966, Cei 1993, Ramirez Leyton and Pincheira Donoso 2005, Waltner 1991, Dunham et al. 1988, Pincheira-Donoso et al. 2008, Pincheira Donoso and Nunez 2005, Pincheira-Donoso et al. 2009
Liolaemus arambarensis	NA	60	0.828934422	NA	NA	NA	NA	33.66070754	33.66598276	44.09488335	9.898615735	-0.001330402	-0.000117193	-0.011545518	0.016731425	-0.011909479	Verrastro et al. 2003, Pincheira-Donoso et al. 2008, Pincheira-Donoso and Tregenza 2011
Liolaemus archeforus	NA	92	1.403850901	NA	NA	NA	NA	33.87103007	33.56825772	44.12680177	8.635308512	-0.000252486	0.226468317	-0.020776452	1.52E-07	-0.024469266	Cei et al. 2003, Cei 1986, Scolaro 2005, Pincheira-Donoso et al. 2008, Pincheira-Donoso et al. 2009
Liolaemus atacamensis	NA	77	1.164461776	NA	NA	8.4	NA	33.76789065	33.63279704	43.94397638	8.4	-0.000934332	0.147734612	-0.013980684	0.007658975	-0.013405075	Donoso-Barros 1966, Pincheira-Donoso et al. 2008, Pincheira Donoso and Nunez 2005, Espinoza et al. 2004, Pincheira-Donoso and Tregenza 2011, Demangel 2016
Liolaemus audituvelatus	NA	60	0.828934422	NA	NA	NA	NA	33.66070754	33.66598276	44.09488335	9.898615735	-0.000410617	0.288616482	-0.020043389	0.001893796	-0.015378995	Nunez and Yanez 1983, Ramirez Leyton and Pincheira Donoso 2005, Espinoza et al. 2004, Pincheira-Donoso and Tregenza 2011, Demangel 2016
Liolaemus austromendocinus	35	104	1.568752252	NA	NA	NA	NA	35	34.16733165	44.48333131	8.296304762	-0.001055863	-0.081687247	-0.005655429	0.017478278	-0.010969368	Cei 1986, Schulte et al. 2000, Espinoza et al. 2000, Espinoza and Lobo 2003, Scolaro 2006, Pincheira-Donoso et al. 2008, Pincheira-Donoso et al. 2009, Sinervo et al. 2010
Liolaemus azarai	NA	54.3	0.694675072	NA	NA	NA	NA	33.61159125	33.68880434	44.0874295	10.1936339	-0.002139202	-0.01804321	-0.003979158	0.027078301	-0.009520091	Avila 2003, Pincheira-Donoso et al. 2008, Zaracho et al. 2017,
Liolaemus baguali	28.2	101	1.529383295	NA	44.5	7.01	NA	28.2	31.32004397	44.5	7.01	-0.00021029	0.203899958	-0.020074717	1.21E-07	-0.024530931	Cei et al. 2003, Cei 1986, Scolaro 2005, Cei and Scolaro 1983, Pincheira-Donoso et al. 2008, Espinoza et al. 2004, Bonino et al. 2011
Liolaemus bibronii	34.5	70	1.03626863	NA	44.53	8.49	NA	34.5	34.07874529	44.35455982	9.459703433	-0.000298316	0.183507649	-0.021990863	0.003224138	-0.021336788	Schlute et al. 2004, Cei et al. 2003, Cruz et al. 2005, Cei 1986, Schulte et al. 2000, Scolaro 2005, Cei 1982, Pincheira-Donoso et al. 2008, Pincheira Donoso and Nunez 2005, Medina et al. 2009, Halloy et al. 2006, Pincheira-Donoso et al. 2009, Sinervo et al. 2010, Kohler 2005, Espinoza et al. 2004, Medina and Ibarguengoytia 2010, Tuli et al. 2009, Labra et al. 2008, Pincheira-Donoso, pers. Comm. …
Liolaemus bitaeniatus	32.1	62	0.873037062	NA	NA	NA	NA	32.1	32.73316021	43.58476204	9.767256826	-0.001487446	0.056958046	-0.008644568	0.01806625	-0.011436614	Schulte et al. 2000, Lobo and Espinoza 1999, Lobo and Espinoza 2004, Cei 1993, Pincheira-Donoso et al. 2008, Sinervo et al. 2010, Kohler 2005, Espinoza et al. 2004, Pincheira-Donoso and Tregenza 2011, Ramirez-Pinilla 1995, Mesquita et al. 2016
Liolaemus boulengeri	35.7	78	1.181816985	NA	43.99	9.4	NA	35.7	34.37294499	43.99	9.4	-0.00019431	0.10717991	-0.020651937	0.006424094	-0.019164558	Cei et al. 2003, Cruz et al. 2005, Cei 1986, Schulte et al. 2000, Abdala 2006, Scolaro 2005, Pincheira-Donoso et al. 2008, Halloy et al. 2006, Pincheira-Donoso et al. 2009, Sinervo et al. 2010, Medina and Ibarguengoytia 2010, Pincheira-Donoso and Tregenza 2011, Pincheira-Donoso, pers. Comm. 8.6.2011, Acosta et al. 1996, Piantoni et al. 2016
Liolaemus caparensis	NA	59	0.80632868	NA	NA	NA	NA	33.65243765	33.66982531	44.09362832	9.948289033	-0.000252486	0.226468317	-0.020776452	1.52E-07	-0.024469266	Breitman et al. 2011
Liolaemus casamiquelai	36	106.2	1.596907628	NA	NA	NA	NA	36	34.74332377	44.80660734	8.256058558	-0.000585884	-0.080036258	-0.006182669	0.015629895	-0.013446012	Avila et al. 2010, Moreno Azocar et al. 2013
Liolaemus cazianiae	NA	76.3	1.152178494	NA	NA	NA	NA	33.77896039	33.61103732	44.11282933	9.188327222	-0.000934332	0.147734612	-0.013980684	0.007658975	-0.013405075	Lobo et al. 2010, Paz et al. 2013
Liolaemus chacoensis	36.5	55	0.711903249	NA	44.1	14.9	NA	36.5	34.33785451	44.1	14.9	-0.001887882	-0.010778099	-0.005389262	0.025790893	-0.009999475	Fitzgerald et al. 1999, Schlute et al. 2004, Cei et al. 2003, Cruz et al. 2005, Cei 1986, Schulte et al. 2000, Cei 1993, Pincheira-Donoso et al. 2008, Pincheira-Donoso et al. 2009, Cruz et al. 2011, Pianka et al. 2017,
Liolaemus chaltin	32.3	58.7	0.7994722	NA	NA	NA	NA	32.3	32.8788221	43.65443821	9.933863729	-0.00114925	0.138919191	-0.012716326	0.013842344	-0.012689235	Lobo and Espinoza 2004, Pincheira-Donoso et al. 2008, Espinoza et al. 2004, Sinervo et al. 2010, Labra et al. 2008, Pincheira-Donoso, pers. Comm. 8.6.2011
Liolaemus chavin	NA	66.5	0.967278636	NA	NA	NA	NA	33.7113182	33.64246683	44.102564	9.594621589	-0.000814697	0.215416896	-0.022473878	0.000874716	-0.016326847	Aguilar et al. 2013
Liolaemus chehuachekenk	NA	103.6	1.563569163	NA	NA	NA	NA	35.34748538	34.3247375	44.42425107	8.125609116	-0.00036305	-0.00039634	-0.010775034	0.011538135	-0.016439831	Avila et al. 2008, Pincheira-Donoso et al. 2008, Stellatelli et al. 2016
Liolaemus chungara	NA	55.6	0.72649663	NA	NA	NA	NA	33.62323257	33.68339527	44.08919618	10.12371	-0.000735558	0.281510073	-0.023238686	0.000570569	-0.016278749	Quinteros et al. 2014
Liolaemus coeruleus	34.6	70	1.03626863	NA	NA	NA	NA	34.6	34.13742752	44.38706593	9.461888108	-0.001088902	-0.041292934	-0.007980655	0.014974101	-0.011906727	Cei 1986, Schulte et al. 2000, Pincheira-Donoso and Scolaro 2007, Scolaro 2006, Pincheira-Donoso et al. 2008, Pincheira Donoso and Nunez 2005, Pincheira-Donoso et al. 2009, Pincheira-Donoso and Tregenza 2011, Demangel 2016, Demangel 2016b
Liolaemus cuyanus	37.7	104.3	1.572626503	NA	45.7	12	NA	37.7	35.39747415	45.7	12	-0.001223916	-0.077811565	-0.004461477	0.017955393	-0.010262902	Cei et al. 2003, Cruz et al. 2005, Cei 1986, Schulte et al. 2000, Cei 1993, Pincheira-Donoso et al. 2008, Halloy et al. 2006, Pincheira-Donoso et al. 2009, Sinervo et al. 2010, Tuli et al. 2009, Pincheira-Donoso et al. 2011, Cruz et al. 2011, Moreno Azocar et al. 2013, Moreno Azocar and Acosta 2011, Etheridge and Espinoza 1997
Liolaemus cuyumhue	NA	61.7	0.866513153	NA	NA	NA	NA	33.67445502	33.65959508	44.09696966	9.816041163	-0.000808718	-0.159676176	-0.001590305	0.019721655	-0.010452194	Avila et al. 2009
Liolaemus darwinii	36.4	69	1.016915634	NA	44.68	10.11	NA	36.4	34.99708919	44.68	10.11	-0.001085517	-0.105099769	-0.00350442	0.018544147	-0.010325999	Schlute et al. 2004, Cei et al. 2003, Cruz et al. 2005, Schulte et al. 2000, Donoso-Barros 1966, Cei 1993, Scolaro 2005, Muller and Hellmich 1939, Pincheira-Donoso et al. 2008, Halloy et al. 2006, Pincheira-Donoso et al. 2009, Sinervo et al. 2010, Kohler 2005, Tuli et al. 2009, Martori and Aun 2010, Pincheira-Donoso and Tregenza 2011, Pincheira-Donoso, pers. Comm. 8.6.2011, Cruz et al. 2011, Turn…
Liolaemus ditadai	NA	95	1.447010006	NA	NA	NA	NA	33.88681903	33.56092148	44.12919789	8.540471765	-0.001770443	-0.028667575	-0.00519627	0.022184752	-0.01081945	Pincheira-Donoso et al. 2008, Cei 1986, Abdala and Heredia 2013, Avila et al. 2015
Liolaemus dumerili	NA	80.9	1.230916571	NA	44.94	5.65	NA	33.80776525	33.59765332	44.11720074	9.015310122	-0.00036305	-0.00039634	-0.010775034	0.011538135	-0.016439831	Abdala et al. 2012
Liolaemus erguetae	28.2	67	0.977353664	NA	NA	NA	NA	28.2	30.40442672	42.31041034	9.451998075	-0.000410617	0.288616482	-0.020043389	0.001893796	-0.015378995	Ramirez Leyton and Pincheira-Donoso 2005, Espinoza et al. 2004, Labra et al. 2008, Demangel 2016
Liolaemus escarchadosi	27	91	1.389151192	NA	NA	NA	NA	27	29.54183814	41.89422944	8.517617116	-0.000148717	0.207518692	-0.023559424	0.000436764	-0.023650383	Scholaro and Cei 1997, Scolaro 2005, Pincheira-Donoso et al. 2008, Pincheira-Donoso and Nunez 2005, Bonino et al. 2011, Demangel 2016
Liolaemus espinozai	37.6	62.8	0.890281017	NA	44.69	8.46	NA	37.6	35.95405005	45.37150459	9.849384679	-0.000934332	0.147734612	-0.013980684	0.007658975	-0.013405075	Pincheira-Donoso et al. 2008, Abdala 2005, Pincheira-Donoso and Tregenza 2011, Cruz et al. 2011, Pincheira-Donoso, pers. Comm. To Shai Meiri, 6.7.2011, Stellatelli et al. 2016
Liolaemus fabiani	32.7	90.3	1.378764963	31.5	NA	7.9	NA	32.7	31.5	43.21155293	7.9	-0.000410617	0.288616482	-0.020043389	0.001893796	-0.015378995	Yanez and Nunez 1983, Ramirez Leyton and Pincheira Donoso 2005, Pincheira-Donoso et al. 2008, Pincheira-Donoso and Nunez 2005, Espinoza et al. 2004, Sinervo et al. 2010, Pincheira-Donoso and Tregenza 2011, Rodrigues-Serrano et al. 2009, Labra et al. 2008, Demangel 2016
Liolaemus fittkaui	NA	65	0.936592666	NA	NA	NA	NA	33.70009231	33.64768288	44.10086036	9.662050179	-0.000735558	0.281510073	-0.023238686	0.000570569	-0.016278749	Pincheira-Donoso et al. 2008, Espinoza et al. 2004, Jimenez-Robles et al. 2016
Liolaemus fitzingerii	34.7	110	1.644193146	NA	44.45	8.24	NA	34.7	33.97610921	44.45	8.24	-0.000213702	0.146942712	-0.020693442	0.00428278	-0.020932794	Schlute et al. 2004, Cei et al. 2003, Cruz et al. 2005, Cei 1986, Schulte et al. 2000, Donoso-Barros 1966, Scolaro 2005, Pincheira-Donoso et al. 2008, Pincheira-Donoso and Nunez 2005, Pincheira-Donoso et al. 2009, Espinoza et al. 2004, Sinervo et al. 2010, Tuli et al. 2009, Moreno Azocar et al. 2013, Demangel 2016
Liolaemus fuscus	36	53.5	0.674711663	35.3	NA	NA	NA	36	35.3	43.4849627	3.99	-0.001179435	-0.042692783	-0.007687991	0.016356589	-0.011227955	Fitch 1970, Cei et al. 2003, Jaksic et al. 1980, Schulte et al. 2000, Donoso-Barros 1966, Cei 1982, Pincheira-Donoso et al. 2008, Pincheira Donoso and Nunez 2005, Jaksic et al. 1982, Halloy et al. 2006, Pincheira-Donoso et al. 2009, Espinoza et al. 2004, Sinervo et al. 2010, Pincheira-Donoso and Tregenza 2011, Rodrigues-Serrano et al. 2009, Ibarguengoytia 2008, Vidal and Labra 2008, Labra et al. …
Liolaemus gallardoi	26.8	92	1.403850901	NA	NA	NA	NA	26.8	29.41881929	41.82828528	8.480829507	-0.000139028	0.220612238	-0.025652646	0.000655102	-0.023179276	Cei et al. 2003, Cei 1986, Scolaro 2005, Pincheira-Donoso et al. 2008, Pincheira-Donoso et al. 2009, Pincheira-Donoso and Tregenza 2011, Bonino et al. 2011
Liolaemus gardeli	NA	50	0.583710103	NA	NA	NA	NA	NA	NA	NA	NA	-0.001508577	0.029462155	-0.010327071	0.017687017	-0.012780158	Verrastro et al. 2017
Liolaemus goetschi	34	74.3	1.116452356	NA	NA	NA	NA	34	33.7544907	44.18694571	9.27194548	-0.000585884	-0.080036258	-0.006182669	0.015629895	-0.013446012	Muller and Hellmich 1939, Tuli et al. 2009, Avila and Perez 2011, Moreno Azocar et al. 2013
Liolaemus gracielae	NA	76.9	1.162713874	NA	NA	NA	NA	33.78281456	33.6092465	44.11341424	9.165177039	-0.001458047	0.006852742	-0.007917979	0.013424155	-0.011431154	Abdala et al. 2009
Liolaemus gracilis	40.8	58.2	0.787966483	NA	NA	NA	NA	40.8	37.87123779	46.41818663	10.14493541	-0.000899252	-0.161076024	-0.00129764	0.021104144	-0.009773422	Cei et al. 2003, Cei 1986, Schulte et al. 2000, Cei 1993, Scolaro 2005, Pincheira-Donoso et al. 2008, Vega et al. 2008, Sinervo et al. 2010, Pincheira-Donoso and Tregenza 2011, Labra et al. 2008, Pincheira-Donoso, pers. Comm. 8.6.2011, Vetga and Bellagamba 2004, Mesquita et al. 2016
Liolaemus grosseorum	37.3	56	0.73613832	NA	NA	NA	NA	37.3	35.83729578	45.2837588	10.18277194	-0.000808718	-0.159676176	-0.001590305	0.019721655	-0.010452194	Etheridge 2001, Scolaro 2006, Pincheira-Donoso et al. 2008, Espinoza et al. 2004, Sinervo et al. 2010, Pincheira-Donoso, pers. Comm. To Shai Meiri, 6.7.2011
Liolaemus halonastes	NA	71.8	1.070417404	NA	NA	NA	NA	33.74904961	33.62493518	44.10829009	9.367987016	-0.000934332	0.147734612	-0.013980684	0.007658975	-0.013405075	Lobo et al. 2010
Liolaemus hatcheri	27.2	73	1.092710898	NA	NA	NA	NA	27.2	29.77323114	41.97803573	9.17574624	-0.000139028	0.220612238	-0.025652646	0.000655102	-0.023179276	Cei et al. 2003, Cei 1986, Pincheira-Donoso and Scolaro 2007, Scolaro 2005, Pincheira-Donoso et al. 2008, Pincheira-Donoso et al. 2009, Espinoza et al. 2004, Bonino et al. 2011
Liolaemus hermannunezi	34.6	71.4	1.062903362	NA	43.8	5.5	NA	34.6	34.40784148	43.8	5.5	-0.001369085	0.077090307	-0.014371006	0.010226546	-0.01336126	Pincheira-Donoso et al. 2008, Pincheira-Donoso et al. 2007, Pincheira-Donoso et al. 2009, Tuli et al. 2009, Cruz et al. 2009, Demangel 2016, Demangel 2016b
Liolaemus huacahuasicus	32	76	1.146879695	NA	NA	NA	NA	32	32.56914185	43.53489453	9.161148523	-0.001458047	0.006852742	-0.007917979	0.013424155	-0.011431154	Cei 1993, Pincheira-Donoso et al. 2008, Halloy and Halloy 1997, Espinoza et al. 2004, Sinervo et al. 2010, Tuli et al. 2009, Pincheira-Donoso and Tregenza 2011, Pincheira-Donoso, pers. Comm. 8.6.2011, Mesquita et al. 2016
Liolaemus inacayali	NA	75.3	1.134434041	NA	NA	NA	NA	33.77246891	33.61405354	44.11184419	9.227318443	-0.000574642	0.044376648	-0.012749488	0.010436001	-0.016480264	Abdala 2003, Scolaro 2006, Pincheira-Donoso et al. 2008, Avila et al. 2010, Tuli et al. 2009, Kozykariski et al. 2011
Liolaemus irregularis	36.6	90	1.374289052	NA	44.98	6.96	NA	36.6	35.41162627	44.98	6.96	-0.000934332	0.147734612	-0.013980684	0.007658975	-0.013405075	Schlute et al. 2004, Cruz et al. 2005, Schulte et al. 2000, Cei 1993, Pincheira-Donoso et al. 2008, Sinervo et al. 2010, Tuli et al. 2009, Pincheira-Donoso and Tregenza 2011, Pincheira-Donoso, pers. Comm. 8.6.2011, Cruz et al. 2011, Valdecantos et al. 2013, Cabezas-Cartes et al. 2015, Piantoni et al. 2016, Semhan and Halloy 2016
Liolaemus islugensis	28.2	70.3	1.042020642	NA	NA	NA	NA	NA	NA	NA	NA	-0.000735558	0.281510073	-0.023238686	0.000570569	-0.016278749	Ortiz and Marquet 1987, Pincheira-Donoso et al. 2008, Espinoza et al. 2004, Labra et al. 2008, Marquez et al. 1989, Demangel 2016
Liolaemus juanortizi	NA	94.4	1.438488266	NA	NA	NA	NA	33.88370151	33.56237002	44.12872478	8.559197224	-0.000868074	0.192326432	-0.017066685	0.005296173	-0.014362966	Young-Downey and Moreno 1991, Pincheira-Donoso et al. 2008, Pincheira Donoso and Nunez 2005, Vidal and Labra 2008, Demangel 2016
Liolaemus kingii	30.8	100	1.516	NA	NA	NA	NA	30.8	31.72296946	43.12141933	8.320886523	-2.56E-05	0.214756159	-0.03052884	0.001310052	-0.021889286	Schlute et al. 2004, Cei et al. 2003, Cruz et al. 2005, Cei 1986, Donoso-Barros 1966, Scolaro 2005, Pincheira-Donoso et al. 2008, Pincheira-Donoso and Nunez 2005, Sinervo et al. 2010, Pincheira-Donoso and Tregenza 2011, Pincheira-Donoso, pers. Comm. 8.6.2011, Bonino et al. 2011, Cruz et al. 2009, Minoli et al. 2010, Demangel 2016
Liolaemus koslowskyi	36.2	82	1.249081501	NA	46.1	13.22	NA	36.2	34.94241423	46.1	13.22	-0.001458047	0.006852742	-0.007917979	0.013424155	-0.011431154	Schlute et al. 2004, Cruz et al. 2005, Schulte et al. 2000, Pincheira-Donoso et al. 2008, Halloy et al. 2006, Pincheira-Donoso et al. 2009, Espinoza et al. 2004, Sinervo et al. 2010, Tuli et al. 2009, Martori and Aun 2010, Pincheira-Donoso and Tregenza 2011, Labra et al. 2008, Cruz et al. 2011, Halloy 2006, Cruz et al. 2014, Aun and Martori 1998, Kozykariski et al. 2011, Mesquita et al. 2016, Pas…
Liolaemus laurenti	35.9	73	1.092710898	NA	46.18	12.2	NA	35.9	35.08452542	46.18	12.2	-0.001223916	-0.077811565	-0.004461477	0.017955393	-0.010262902	Schlute et al. 2004, Cruz et al. 2005, Schulte et al. 2000, Cei 1993, Pincheira-Donoso et al. 2008, Pincheira-Donoso et al. 2009, Sinervo et al. 2010, Tuli et al. 2009, Cruz et al. 2011, Cruz et al. 2014
Liolaemus lemniscatus	35.9	56	0.73613832	35.2	NA	NA	NA	35.9	35.0157445	44.82867332	10.15218649	-0.001369085	0.077090307	-0.014371006	0.010226546	-0.01336126	Web and Greer 1969, Schlute et al. 2004, Jaksic et al. 1980, Cei 1986, Schulte et al. 2000, Donoso-Barros 1966, Scolaro 2006, Pincheira-Donoso et al. 2008, Pincheira Donoso and Nunez 2005, Jaksic et al. 1982, Halloy et al. 2006, Sinervo et al. 2010, Kohler 2005, Espinoza et al. 2004, Pincheira-Donoso and Tregenza 2011, Rodrigues-Serrano et al. 2009, Ibarguengoytia 2008, Vidal and Labra 2008, Labr…
Liolaemus lentus	NA	69.8	1.032420244	NA	NA	NA	NA	33.73514905	33.63139398	44.10618055	9.451481034	-0.000899252	-0.161076024	-0.00129764	0.021104144	-0.009773422	Abdala and Heredia 2013, Perez and Avila 2011
Liolaemus lineomaculatus	28	68	0.997280103	NA	NA	NA	NA	28	30.27939736	42.24413481	9.403683607	-2.56E-05	0.214756159	-0.03052884	0.001310052	-0.021889286	Fitch 1970, Cei et al. 2003, Cei 1986, Schulte et al. 2000, Donoso-Barros 1966, Scolaro 2005, Pincheira-Donoso et al. 2008, Pincheira-Donoso et al. 2009, Medina and Ibarguengoytia 2010, Tuli et al. 2009, Pincheira-Donoso and Tregenza 2011, Ibarguengoytia 2008, Bonino et al. 2011, Minoli et al. 2010, Piantoni et al. 2016, Demangel 2016
Liolaemus loboi	NA	72.7	1.08717207	NA	NA	NA	NA	33.75517899	33.6220872	44.10922028	9.331170727	-0.000552158	0.293202459	-0.025883125	4.82E-05	-0.022548769	Abdala 2003, Scolaro 2006, Pincheira-Donoso et al. 2008
Liolaemus lopezi	NA	66.5	0.967278636	NA	NA	NA	NA	33.7113182	33.64246683	44.102564	9.594621589	-0.000735558	0.281510073	-0.023238686	0.000570569	-0.016278749	Pincheira-Donoso, pers. Comm. 8.6.2011
Liolaemus lutzae	34.1	89	1.359260851	NA	NA	NA	NA	34.1	33.71977437	44.20405795	8.738648206	-0.001330402	-0.000117193	-0.011545518	0.016731425	-0.011909479	Perry and Garland 2002, Cooper and Vitt 2002, Schulte et al. 2000, Rocha 2000, Verrastro et al. 2003, Pincheira-Donoso et al. 2008, Halloy et al. 2006, Sinervo et al. 2010, Kohler 2005, Rand 1982, Martori and Aun 2010, Pincheira-Donoso and Tregenza 2011, Labra et al. 2008, Verrastro 2004, Rocha et al. 2009, Winck and Rocha 2012, Maia-Carneiro et al. 2012, Halloy 2006, Maia-Carneiro and Rocha 2013…
Liolaemus magellanicus	27	71	1.055347106	NA	NA	NA	NA	27	29.670239	41.91539235	9.253777781	-0.00021029	0.203899958	-0.020074717	1.21E-07	-0.024530931	Fitch 1970, Cei et al. 2003, Pianka and Vitt 2003, Cei 1986, Schulte et al. 2000, Donoso-Barros 1966, Scolaro 2005, Pincheira-Donoso et al. 2008, Pincheira Donoso and Nunez 2005, Sinervo et al. 2010, Tuli et al. 2009, Pincheira-Donoso and Tregenza 2011, Rodrigues-Serrano et al. 2009, Ibarguengoytia 2008, Labra et al. 2008, Pincheira-Donoso, pers. Comm. 8.6.2011, Ibarguengoytia et al. 2010, Bonino…
Liolaemus maldonadae	NA	85.6	1.306871249	NA	NA	NA	NA	33.83555186	33.58474245	44.12141762	8.848409196	-0.001223916	-0.077811565	-0.004461477	0.017955393	-0.010262902	Nunez et al. 1991, Pincheira-Donoso et al. 2008, Pincheira Donoso and Nunez 2005, Demangel 2016
Liolaemus melaniceps	NA	103.7	1.564866809	NA	NA	NA	NA	33.92993475	33.54088803	44.13574111	8.281496147	NA	NA	NA	NA	NA	Pincheira-Donoso and Nunez 2005, Demangel 2016
Liolaemus melanops	36.6	99	1.502482198	NA	44.6	6.99	NA	36.6	35.1317388	45.00763047	8.477409377	-0.00036305	-0.00039634	-0.010775034	0.011538135	-0.016439831	Schlute et al. 2004, Cei et al. 2003, Cruz et al. 2005, Schulte et al. 2000, Scolaro 2005, Muller and Hellmich 1939, Pincheira-Donoso et al. 2008, Nori et al. 2010, Sinervo et al. 2010, Kohler 2005, Pincheira-Donoso, pers. Comm. 8.6.2011, Passos et al. 2015, Stellatelli et al. 2016
Liolaemus millcayac	NA	78.4	1.188696846	NA	NA	NA	NA	33.79231995	33.60482988	44.11485677	9.108082701	-0.000989785	-0.162475872	-0.001004975	0.022486632	-0.009094651	Abdala and Heredia 2013
Liolaemus molinai	NA	70.7	1.049651925	NA	NA	NA	NA	33.74145294	33.62846492	44.10713723	9.413616565	-0.000934332	0.147734612	-0.013980684	0.007658975	-0.013405075	Valladares et al. 2002, Uetz 2006, Demangel 2016
Liolaemus montanezi	NA	64	0.915739379	NA	NA	NA	NA	33.69246352	33.65122754	44.09970262	9.707872673	-0.001458047	0.006852742	-0.007917979	0.013424155	-0.011431154	Cabrera and Monguillot 2006, Pincheira-Donoso et al. 2008
Liolaemus morenoi	36.5	88.4	1.350162665	NA	NA	NA	NA	36.5	35.1316477	44.9847813	8.811145242	-0.000773253	0.052555063	-0.013154867	0.010383638	-0.015700513	Etheridge and Christie 2003, Scolaro 2006, Pincheira-Donoso et al. 2008, Pincheira-Donoso and Tregenza 2011
Liolaemus multicolor	36.5	84	1.281492949	NA	44.7	8.06	NA	36.5	35.15656434	44.7	8.06	-0.00114925	0.138919191	-0.012716326	0.013842344	-0.012689235	Schulte et al. 2000, Cei 1993, Laurent 1992, Ramirez Leyton and Pincheira Donoso 2005, Pincheira-Donoso et al. 2008, Pincheira Donoso and Nunez 2005, Pincheira-Donoso et al. 2009, Sinervo et al. 2010, Tuli et al. 2009, Pincheira-Donoso and Tregenza 2011, Valdecantos et al. 2013, Cruz et al. 2014, Cabezas-Cartes et al. 2015, Piantoni et al. 2016, Semhan and Halloy 2016
Liolaemus multimaculatus	34.2	72.3	1.079751307	NA	43.83	8.93	NA	34.2	33.76115317	43.83	8.93	-0.000600452	0.127517716	-0.021579845	0.004280553	-0.017939995	Vega et al. 2000, Cruz et al. 2005, Cei 1986, Schulte et al. 2000, Cei 1993, Scolaro 2006, Pincheira-Donoso et al. 2008, Kohler 2005, Tuli et al. 2009, Pincheira-Donoso and Tregenza 2011, Labra et al. 2008, Kacoliris et al. 2013, Halloy 2006, Mesquita et al. 2016, Stellatelli et al. 2016
Liolaemus nigriceps	NA	98	1.488827156	NA	NA	NA	NA	33.90211706	33.55381335	44.13151951	8.448583795	-0.000934332	0.147734612	-0.013980684	0.007658975	-0.013405075	Donoso-Barros 1966, Cei 1993, Ramirez Leyton and Pincheira Donoso 2005, Pincheira-Donoso et al. 2008, Pincheira-Donoso and Nunez 2005, Demangel 2016
Liolaemus olongasta	36.6	67	0.977353664	NA	44.58	11.85	NA	36.6	34.83205483	44.58	11.85	-0.001223916	-0.077811565	-0.004461477	0.017955393	-0.010262902	Cruz et al. 2005, Schulte et al. 2000, Pincheira-Donoso et al. 2008, Sinervo et al. 2010, Tuli et al. 2009, Martori and Aun 2010, Pincheira-Donoso and Tregenza 2011, Labra et al. 2008, Pincheira-Donoso, pers. Comm. 8.6.2011, Cruz et al. 2011, Cruz et al. 2014, Etheridge and Espinoza 1997
Liolaemus ornatus	32.6	71.2	1.05913054	NA	NA	6.91	NA	32.6	32.95498879	43.73549439	9.367775701	-0.000573088	0.285063277	-0.021641038	0.001232182	-0.015828872	Cei et al. 2003, Schulte et al. 2000, Donoso-Barros 1966, Cei 1993, Ramirez Leyton and Pincheira Donoso 2005, Pincheira-Donoso et al. 2008, Pincheira-Donoso and Nunez 2005, Pincheira-Donoso et al. 2009, Espinoza et al. 2004, Sinervo et al. 2010, Tuli et al. 2009, Rodrigues-Serrano et al. 2009, Vidal and Labra 2008, Labra et al. 2008, Pincheira-Donoso, pers. Comm. 8.6.2011, Cruz et al. 2011, Marqu…
Liolaemus pagaburoi	31.7	57.2	0.764655501	NA	NA	NA	NA	31.7	32.54012126	43.46160893	9.997539294	-0.001458047	0.006852742	-0.007917979	0.013424155	-0.011431154	Lobo and Espinoza 1999, Lobo and Espinoza 2004, Pincheira-Donoso et al. 2008, Espinoza et al. 2004, Pincheira-Donoso and Tregenza 2011
Liolaemus patriciaiturrae	NA	96.6	1.469474161	NA	NA	NA	NA	33.89503712	33.557103	44.13044507	8.491109588	-0.001458047	0.006852742	-0.007917979	0.013424155	-0.011431154	Navarro and Nunez 1993, Pincheira-Donoso et al. 2008, Pincheira-Donoso and Nunez 2005, Espinoza et al. 2004, Pincheira-Donoso and Tregenza 2011, Troncoso-Palacios and Ferri-Yanez 2013, Demangel 2016
Liolaemus pipanaco	NA	79.7	1.210816421	NA	NA	NA	NA	33.80041199	33.60106997	44.11608481	9.059477694	-0.001458047	0.006852742	-0.007917979	0.013424155	-0.011431154	Abdala and Heredia 2013
Liolaemus pleopholis	NA	81	1.232578103	NA	NA	NA	NA	33.80837309	33.59737089	44.11729299	9.011659113	-0.000735558	0.281510073	-0.023238686	0.000570569	-0.016278749	Laurent 1998, Pincheira-Donoso et al. 2008, Pincheira Donoso and Nunez 2005, Pincheira-Donoso and Tregenza 2011, Demangel 2016
Liolaemus poconchilensis	NA	57	0.759944428	NA	NA	NA	NA	33.63546883	33.67770977	44.09105314	10.05021264	-0.000735558	0.281510073	-0.023238686	0.000570569	-0.016278749	Valladares 2004, Pincheira-Donoso et al. 2008, Demangel 2016
Liolaemus pseudoanomalus	35.4	68	0.997280103	NA	NA	NA	NA	35.4	34.6218827	44.64958661	9.565349534	-0.001223916	-0.077811565	-0.004461477	0.017955393	-0.010262902	Cei et al. 2003, Cruz et al. 2005, Cei 1986, Schulte et al. 2000, Cei 1993, Villavicencio et al. 2007, Pincheira-Donoso et al. 2008, Sinervo et al. 2010, Pincheira-Donoso and Tregenza 2011, Labra et al. 2008, Pincheira-Donoso, pers. Comm. 8.6.2011, Cruz et al. 2014, Kozykariski et al. 2011
Liolaemus puelche	NA	89	1.359260851	NA	NA	NA	NA	34.96684363	34.22845758	44.48583506	8.757585919	-0.000808718	-0.159676176	-0.001590305	0.019721655	-0.010452194	Avila et al. 2007, Pincheira-Donoso et al. 2008
Liolaemus puna	33.3	56	0.73613832	NA	NA	NA	NA	33.3	33.49000641	43.98351458	10.09538495	-0.001252182	0.094897042	-0.011116877	0.013702948	-0.012269875	Lobo and Espinoza 2004, Pincheira-Donoso et al. 2008, Ramirez Leyton and Pincheira Donoso 2005, Pincheira-Donoso et al. 2008, Pincheira Donoso and Nunez 2005, Sinervo et al. 2010, Mella et al. 2010, Pincheira-Donoso and Tregenza 2011, Pincheira-Donoso, pers. Comm. 8.6.2011, Demangel 2016
Liolaemus purul	NA	77.1	1.166207409	NA	NA	NA	NA	33.78409261	33.60865267	44.11360819	9.157500433	-0.000960622	0.185146383	-0.020127065	0.00513738	-0.017955014	Abdala et al. 2012, Cruz et al. 2014
Liolaemus quilmes	34.3	89	1.359260851	NA	NA	NA	NA	34.3	33.83713884	44.26907016	8.743017555	-0.000934332	0.147734612	-0.013980684	0.007658975	-0.013405075	Cei et al. 2003, Cruz et al. 2005, Schulte et al. 2000, Pincheira-Donoso et al. 2008, Robles and Halloy 2009, Halloy et al. 2006, Pincheira-Donoso et al. 2009, Sinervo et al. 2010, Salica and Halloy2009, Cruz et al. 2011, Robles and Halloy 2012, Robles and Halloy 2008, Halloy 2006, Cruz et al. 2014, Kozykariski et al. 2011, Passos et al. 2015, Stellatelli et al. 2016
Liolaemus rabinoi	NA	68	0.997280103	NA	NA	NA	NA	33.72229368	33.63736715	44.10422963	9.528697109	-0.000808718	-0.159676176	-0.001590305	0.019721655	-0.010452194	Pincheira-Donoso et al. 2008, Espinoza et al. 2004, Abdala et al. 2017
Liolaemus ramirezae	32.2	57.6	0.774028431	NA	NA	NA	NA	32.2	32.82992704	43.62354522	9.987791912	-0.000934332	0.147734612	-0.013980684	0.007658975	-0.013405075	Lobo and Espinoza 1999, Lobo and Espinoza 2004, Halloy et al. 2006, Sinervo et al. 2010, Pincheira-Donoso and Tregenza 2011, Robles and Halloy 2008, Semhan and Halloy 2016, Robles and Halloy 2017
Liolaemus riojanus	NA	63	0.894557682	NA	45.2	10.7	NA	35.05530563	34.61722923	45.2	10.7	-0.001223916	-0.077811565	-0.004461477	0.017955393	-0.010262902	Cei et al. 2003, Cruz et al. 2005, Cei 1986, Pincheira-Donoso et al. 2008, Pincheira-Donoso et al. 2009, Espinoza et al. 2004, Tuli et al. 2009, Pincheira-Donoso and Tregenza 2011, Cruz et al. 2014
Liolaemus ruibali	32.9	66.7	0.971317708	NA	NA	NA	NA	32.9	33.16481352	43.83857997	9.567989288	-0.000989785	-0.162475872	-0.001004975	0.022486632	-0.009094651	Cooper and Vitt 2002, Cei 1986, Schulte et al. 2000, Pincheira-Donoso et al. 2008, Halloy et al. 2006, Pincheira-Donoso et al. 2009, Espinoza et al. 2004, Sinervo et al. 2010, Labra et al. 2008, Turner 1977, Cruz et al. 2014, Villavicencio et al. 2005, Canovas et al. 2014, Kohl et al. 2016
Liolaemus salinicola	36.7	77	1.164461776	NA	48.21	14.2	NA	36.7	36.0000616	48.21	14.2	-0.001458047	0.006852742	-0.007917979	0.013424155	-0.011431154	Cruz et al. 2005, Schulte et al. 2000, Cei 1993, Pincheira-Donoso et al. 2008, Sinervo et al. 2010, Tuli et al. 2009, Cruz et al. 2014
Liolaemus sanjuanensis	30.1	65	0.936592666	NA	NA	NA	NA	30.1	31.53506827	42.93061056	9.583399873	-0.000989785	-0.162475872	-0.001004975	0.022486632	-0.009094651	Cei et al. 2003, Cei 1986, Cei 1982, Pincheira-Donoso et al. 2008, Sinervo et al. 2010, Kohler 2005, Pincheira-Donoso and Tregenza 2011, Labra et al. 2008, Pincheira-Donoso, pers. Comm. 8.6.2011, Acosta et al. 2004
Liolaemus scapularis	36.2	77	1.164461776	NA	45.57	9.39	NA	36.2	35.29272667	45.57	9.39	-0.001458047	0.006852742	-0.007917979	0.013424155	-0.011431154	Cei et al. 2003, Cruz et al. 2005, Schulte et al. 2000, Cei 1993, Laurent 1982, Pincheira-Donoso et al. 2008, Pincheira-Donoso et al. 2009, Sinervo et al. 2010, Kohler 2005, Tuli et al. 2009, Pincheira-Donoso and Tregenza 2011, Halloy 2006, Cruz et al. 2014, Mesquita et al. 2016
Liolaemus shehuen	NA	99.8	1.513307286	NA	NA	NA	NA	33.91107266	33.54965219	44.13287861	8.394791764	-0.00036305	-0.00039634	-0.010775034	0.011538135	-0.016439831	Abdala et al. 2012
Liolaemus signifer	34	108	1.619513371	NA	NA	NA	NA	34	33.56098357	44.15505204	8.162511096	-0.000573088	0.285063277	-0.021641038	0.001232182	-0.015828872	Tinkle et al. 1970, Dunham and Miles 1985, Fitch 1970, Donoso-Barros 1966, Boulenger 1901, Ramirez Leyton and Pincheira Donoso 2005, Pincheira-Donoso et al. 2008, Warne and Charnov 2008, Pincheira Donoso and Nunez 2005, Pinilla 1991, Espinoza et al. 2004, Sinervo et al. 2010, Pincheira-Donoso and Tregenza 2011, Ibarguengoytia 2008, Pincheira-Donoso, pers. Comm. 8.6.2011, Pearson and Bradford 1976…
Liolaemus silvai	NA	71.9	1.072289374	NA	NA	NA	NA	33.74973444	33.62461698	44.10839402	9.363873596	NA	NA	NA	NA	NA	Pincheira-Donoso et al. 2008, Pincheira Donoso and Nunez 2005, Espinoza et al. 2004, Vidal and Labra 2008, Troncoso-Palacios et al. 2015, Demangel 2016
Liolaemus smaug	NA	71.3	1.061018274	29.9	45.1	7.68	NA	33.74561111	33.62653285	44.10776827	9.388640431	-0.001088902	-0.041292934	-0.007980655	0.014974101	-0.011906727	Abdala et al. 2010
Liolaemus stolzmanni	NA	61.3	0.85776509	NA	NA	NA	NA	33.6712547	33.66108209	44.09648399	9.835263941	-0.001200291	0.123600225	-0.017015961	0.008041955	-0.013853033	Langstroth 2011, Pincheira-Donoso et al. 2008, Laurent 1995, Pincheira-Donoso, pers. Comm. 10.6.2011, Astroza and Gonzalez 2013, Demangel 2016
Liolaemus tirantii	NA	64.3	0.922029383	NA	NA	NA	NA	NA	NA	NA	NA	-0.000808718	-0.159676176	-0.001590305	0.019721655	-0.010452194	Avila et al. 2017
Liolaemus torresi	NA	65	0.936592666	NA	NA	NA	NA	33.70009231	33.64768288	44.10086036	9.662050179	-0.000410617	0.288616482	-0.020043389	0.001893796	-0.015378995	Ramirez Leyton and Pincheira Donoso 2005, Pincheira-Donoso et al. 2008, Pincheira-Donoso and Tregenza 2011, Diaz-Vega 2014, Demangel 2016
Liolaemus tromen	NA	82.5	1.257257879	NA	NA	NA	NA	33.81740173	33.59317579	44.11866317	8.957428387	-0.001369085	0.077090307	-0.014371006	0.010226546	-0.01336126	Abdala et al. 2012
Liolaemus uptoni	NA	87	1.328691125	NA	NA	NA	NA	33.84353426	33.58103348	44.12262902	8.800462741	-0.00036305	-0.00039634	-0.010775034	0.011538135	-0.016439831	Scolaro and Cei 2006, Scolaro 2006, Avila et al. 2007, Pincheira-Donoso et al. 2008
Liolaemus uspallatensis	35.7	65	0.936592666	NA	NA	NA	NA	35.7	34.82127339	44.75095247	9.705741657	-0.000989785	-0.162475872	-0.001004975	0.022486632	-0.009094651	Cei et al. 2003, Cei 1986, Schulte et al. 2000, Pincheira-Donoso et al. 2008, Sinervo et al. 2010, Pincheira-Donoso and Tregenza 2011, Pincheira-Donoso, pers. Comm. To Shai Meiri, 6.7.2011
Liolaemus velosoi	NA	59.1	0.808606428	NA	NA	NA	NA	33.65327092	33.66943814	44.09375478	9.943283965	-0.001458047	0.006852742	-0.007917979	0.013424155	-0.011431154	Ortiz 1987, Pincheira-Donoso et al. 2008, Pincheira Donoso and Nunez 2005, Pincheira-Donoso et al. 2009, Vidal and Labra 2008
Liolaemus wari	NA	61.4	0.859957445	NA	NA	12.9	NA	33.67205674	33.66070943	44.0966057	9.830446513	-0.001585884	0.031783554	-0.011558045	0.015209194	-0.011379219	Aguilar et al. 2013
Liolaemus wiegmannii	34.4	66	0.957127568	NA	NA	NA	NA	34.4	34.0505054	44.3270712	9.632053879	-0.001165565	-0.036535887	-0.008299646	0.017159745	-0.012672816	Fitzgerald et al. 1999, Cei 1986, Schulte et al. 2000, Cei 1993, Achaval and Olmos 2003, Verrastro et al. 2003, Scolaro 2006, Pincheira-Donoso et al. 2008, Carreira et al. 2005, Halloy et al. 2006, Pincheira-Donoso et al. 2009, Kohler 2005, Rand 1982, Martori and Aun 2010, Pincheira-Donoso and Tregenza 2011, Labra et al. 2008, Loveridge 1959, Aun et al. 1999, Mesquita et al. 2016, Stellatelli et …
Liolaemus xanthoviridis	36.4	101.2	1.532044047	NA	44.48	7.86	NA	36.4	34.87892098	44.48	7.86	-0.00019431	0.10717991	-0.020651937	0.006424094	-0.019164558	Cei et al. 2003, Cruz et al. 2005, Cei 1986, Scolaro 2005, Pincheira-Donoso et al. 2008, Pincheira-Donoso et al. 2009, Sinervo et al. 2010, Tuli et al. 2009, Pincheira-Donoso and Tregenza 2011, Cruz et al. 2014, Escudero et al. 2017
Liolaemus yalguaraz	NA	59.6	0.819937666	NA	NA	NA	NA	NA	NA	NA	NA	-0.000989785	-0.162475872	-0.001004975	0.022486632	-0.009094651	Abdala et al. 2015
Liolaemus yatel	NA	61.1	0.853369628	NA	NA	NA	NA	33.66964671	33.66182923	44.09623996	9.844922419	-2.56E-05	0.214756159	-0.03052884	0.001310052	-0.021889286	Abdala et al. 2014
Liolaemus zapallarensis	NA	110	1.644193146	NA	NA	NA	NA	33.95895482	33.52740404	44.14014518	8.107186419	NA	NA	NA	NA	NA	Schulte et al. 2000, Donoso-Barros 1966, Pincheira Donoso and Nunez 2005, Pincheira-Donoso et al. 2009, Pincheira-Donoso and Tregenza 2011, Ibarguengoytia 2008, Demangel 2016, Demangel 2016b
Liopholis pulchra	NA	110	1.46665698	NA	NA	NA	NA	31.96258683	31.99993584	41.75472407	6.917912247	-0.001192483	-0.125258101	-0.003468357	0.022430692	-0.01200655	Chapple 2003, Wilson and Swan 2003, Greer 1989, Wilson and Swan 2008, Bush et al. 2010
Lioscincus vivae	NA	55	0.494631124	NA	NA	NA	NA	29.67536379	29.54047959	40.76284864	6.092764649	NA	NA	NA	NA	NA	Sadlier et al. 2004, Whittaker et al. 2004
Lipinia macrotympanum	NA	45.7	0.23486941	NA	NA	NA	NA	27.43906168	28.53885988	38.44181328	8.319638666	NA	NA	NA	NA	NA	Smith 1935, Tikader and Sharma 1992, Das and Austin 2007, Stoliczka 1873, Das 2002, Das 1997, Das and Das 2017
Lipinia nitens	NA	33.6	-0.196450473	NA	NA	NA	NA	27.2812713	28.61217618	38.41786711	9.267410289	-0.002514078	-0.000793217	-0.008297432	0.027001922	-0.007132104	Das 2004, Das 2010, Das 2011
Lobulia alpina	NA	70	0.832821571	NA	NA	NA	NA	29.55570446	29.34017271	40.70251105	5.344316281	NA	NA	NA	NA	NA	Greer et al. 2005
Lobulia glacialis	NA	58	0.569108991	NA	NA	NA	NA	29.45923011	29.38499891	40.68787016	5.923791768	-0.001753697	0.016295694	-0.008842148	0.021617127	-0.009015246	Greer et al. 2005
Lobulia stellaris	24.7	64	0.707155136	NA	NA	NA	NA	24.7	26.53907561	39.13207779	5.515375599	-0.001540553	0.005064302	-0.004075824	0.024434791	-0.008609734	Greer et al. 2005
Loxopholis ferreirai	NA	34.5	-0.100121348	NA	NA	NA	NA	NA	NA	NA	NA	-0.001619576	-0.006054496	-0.003926767	0.025222969	-0.008091815	Rodrigues and Avila-Pires 2005, Ribeiro-Junior and Amaral 2017
Loxopholis guianensis	NA	63	0.763422494	NA	NA	NA	NA	NA	NA	NA	NA	-0.002686027	-0.005714998	-0.00356604	0.030631827	-0.007207166	Macculloch and Lathrop 2001, Cole et al. 2013, Ribeiro-Junior and Amaral 2017
Loxopholis hexalepis	NA	41.1	0.150905696	NA	NA	NA	NA	NA	NA	NA	NA	-0.002380163	-0.062115508	0.004745188	0.037803146	-0.005888135	Molina et al. 2002
Loxopholis osvaldoi	NA	37	0.000202093	NA	NA	NA	NA	NA	NA	NA	NA	-0.002369369	0.00607695	-0.005633156	0.028269951	-0.00786364	Avila-Pires 1995, Mesquita et al. 2016, Ribeiro-Junior and Amaral 2017, Moraes et al. 2016
Loxopholis parietalis	NA	45	0.28090772	NA	NA	NA	NA	NA	NA	NA	NA	-0.002318902	-0.005319995	-0.004637021	0.028985476	-0.007387701	Duellman and Mendelson 1995, Avila-Pires 1995, Duellman 1978, Duellman 1990, Dixon and Soini 1986, Bartlett and Bartlett 2003, Vitt and Zani 1996b, Huey et al. 2001, Bartlett and Bartlett 2003, Kohler 2005, Whitworth and Beirne 2011, Torres-Carvajal and Salazar-Valenzuela 2013
Loxopholis rugiceps	NA	44	0.248680738	NA	NA	NA	NA	NA	NA	NA	NA	-0.001440667	-0.009214351	-0.004961733	0.022968085	-0.008801853	Kohler 2003, Dunham et al. 1988, Warne and Charnov 2008, Telford 1971, Kohler 2008, Kohler 2005, Mesquita et al. 2016, Meza-Joya and Ramos-Pallares 2015
Loxopholis snethlageae	NA	33	-0.163866971	NA	NA	NA	NA	NA	NA	NA	NA	-0.001955609	0.00524048	-0.007514889	0.024299079	-0.00826328	Avila-Pires 1995, Ribeiro-Junior and Amaral 2017
Lygisaurus curtus	NA	43.2	0.155977018	NA	NA	NA	NA	30.65242943	30.27904772	41.08469297	5.905177768	NA	NA	NA	NA	NA	Kraus 2007
Lygisaurus foliorum	31.1	44	0.181708692	NA	NA	NA	NA	31.1	30.5317942	41.22854937	5.858207933	-0.001961615	-0.027931071	-0.00544203	0.023553329	-0.010903567	Shine and Greer 1991, Cogger 2000, Wilson and Swan 2003, Greer 1989, Greer 2005, James and Shine 1988, Ingram and Covacevich 1988, Sinervo et al. 2010, Kohler 2005, James 1984, Singh et al. 2002, Swanson 2007, Kutt et al. 2011, Swan et al. 2017
Lygisaurus laevis	NA	37	-0.061276633	NA	NA	NA	NA	30.50783189	30.2777633	41.05146365	6.381142912	-0.001117477	-0.142076506	0.001160608	0.025853415	-0.007353611	Cogger 2000, Wilson and Swan 2003, Greer 2005, Goodman and Isaac 2008, Goodman 2007, Ingram and Covacevich 1988, Goodman et al. 2009
Lygisaurus macfarlani	NA	39.6	0.033957755	NA	NA	NA	NA	30.60779094	30.29978871	41.07791866	6.173299872	-0.00150712	-0.084120451	-0.000300889	0.027728186	-0.00789861	Shine and Greer 1991, Cogegr 2001, Wilson and Swan 2003, Allison 2006, Kraus 2007, Ingram and Covacevich 1988, Horner 1999
Lygisaurus malleolus	NA	32.2	-0.25613339	NA	NA	NA	NA	30.59753995	30.40535947	41.09297801	6.81283349	-0.001117477	-0.142076506	0.001160608	0.025853415	-0.007353611	Couper et al. 2005, Kutt et al. 2011
Lygisaurus sesbrauna	NA	34	-0.179854577	NA	NA	NA	NA	30.67743717	30.42290358	41.11411347	6.646356173	-0.00186333	-0.115349148	0.002012548	0.032896351	-0.007732484	Cogger 2000, Wilson and Swan 2003, Ingram and Covacevich 1988
Lygisaurus tanneri	NA	37	-0.061276633	NA	NA	NA	NA	30.66882468	30.37223747	41.10379614	6.384660081	-0.001117477	-0.142076506	0.001160608	0.025853415	-0.007353611	Wilson and Swan 2003, Ingram and Covacevich 1988
Lygosoma veunsaiensis	NA	33.6	-0.196450473	NA	NA	NA	NA	30.28529735	30.68775425	41.16936977	9.445299181	-0.002203054	-0.018660491	-0.004423295	0.027230482	-0.008125773	Geissler et al. 2012
Mabuya cochonae	NA	98	1.304668998	NA	NA	NA	NA	34.39994101	32.95114655	42.64067784	9.056936893	NA	NA	NA	NA	NA	Hedges and Conn 2012
Macropholidus ataktolepis	NA	43	0.21571284	NA	NA	NA	NA	26.0876759	28.82221599	40.28538104	10.76211801	-0.000814697	0.215416896	-0.022473878	0.000874716	-0.016326847	Pianka and Vitt 2003, Cadle and Chuna 1995
Macropholidus ruthveni	NA	46	0.31242636	NA	NA	NA	NA	26.12305674	28.8057765	40.29075041	10.54960212	-0.000814697	0.215416896	-0.022473878	0.000874716	-0.016326847	Pianka and Vitt 2003, Cadle and Chuna 1995, Torres-Carvajal et al. 2015, Averill-Murray and Averill-Murray 2017
Madascincus minutus	NA	47.4	0.286088265	NA	NA	NA	NA	29.55189879	31.02141745	42.18385169	10.68048042	-0.001571104	-0.023853724	-0.009574256	0.019506211	-0.011414049	Raselimanana and Rakotomalala 2004, Raxworthy and Nussbaum 1993, Glaw and Vences 2007
Manciola guaporicola	35.1	98	1.304668998	NA	NA	NA	NA	35.1	33.3619568	42.86823975	9.072230904	-0.002264737	-0.034197767	-0.003705313	0.029080625	-0.008927565	Avila-Pires 1995, Colli et al. 2002, Blackburn and Vitt 1992, Mesquita et al. 2000, Ribeiro et al. 2014, Mesquita et al. 2016, Ribeiro-Junior and Amaral 2016
Marinussaurus curupira	NA	56.2	0.599629314	NA	NA	NA	NA	29.32080413	30.57181081	41.31200511	9.986074456	-0.001619576	-0.006054496	-0.003926767	0.025222969	-0.008091815	Peloso et al. 2011, Ribeiro-Junior and Amaral 2017
Medopheos edracanthus	NA	93.8	1.386550827	NA	NA	NA	NA	37.71452015	35.75210231	45.23807488	10.93684978	-0.001137635	0.111196329	-0.014642869	0.011299116	-0.013550519	Jordan and Amaya 2011
Menetia alanae	NA	30	-0.355375469	NA	NA	NA	NA	31.68496208	31.091398	41.60274719	8.103819298	-0.00161345	-0.154813531	0.003924584	0.033590744	-0.006303651	Cogger 2000, Pianka and Vitt 2003, Wilson and Swan 2003, Horner 1999, Swanson 2007, Sadlier 1990, Greer 1991
Menetia concinna	NA	31	-0.309393091	NA	NA	NA	NA	31.70178388	31.08358186	41.60530006	8.002778761	-0.00161345	-0.154813531	0.003924584	0.033590744	-0.006303651	Cogger 2000, Pianka and Vitt 2003, Wilson and Swan 2003, Wilson and Swan 2008, Horner 1999
Menetia greyii	33	40	0.048051712	NA	NA	NA	NA	33	31.7079096	42.00463785	7.242843429	-0.00075318	-0.160529732	-0.000204111	0.021124487	-0.008822573	Greer 2001, Cogger 2000, Cox et al. 2003, Pianka 1986, Pianka and Vitt 2003, Wilson and Swan 2003, Henle 1991, Greer 1989, Greer 2005, Greer 1974, Cree 1994, Dunham et al. 1988, Fitch 1982, Warne and Charnov 2008, James and Shine 1988, Huey et al. 2001, Chapman and Dell 1985, Storr et al. 1999, Taylor 1985, Henle 1989c, Horner 1999, Kohler 2005, Bush et al. 2010, Bush 1992, Michael and Lindenmaye…
Menetia maini	NA	28	-0.452126717	NA	NA	NA	NA	31.64956743	31.10784391	41.59737572	8.316418094	-0.000824127	-0.1480395	0.000447616	0.021805801	-0.008022421	Cogger 2000, Pianka and Vitt 2003, Wilson and Swan 2003, Horner 1999
Menetia surda	NA	32	-0.26487072	NA	NA	NA	NA	31.71807156	31.07601389	41.60777187	7.904946407	-0.000504357	-0.15241127	-0.000299697	0.016978883	-0.008167582	Cogger 2000, Pianka and Vitt 2003, Wilson and Swan 2003
Meroles anchietae	32.1	55	0.592810297	NA	NA	NA	NA	32.1	32.69214084	42.86857244	8.916051542	-0.000982594	-0.169682858	-0.001682115	0.019295265	-0.00937022	Dunham and Miles 1985, Huey and Pianka 1981, FitzSimons 1943, Cox et al. 2003, Branch 1998, Cooper and Vitt 2002, Pianka and Vitt 2003, Greene 1982, Arnold 1998, Rogner 1997b, Nagy et al. 1999, Dunham et al. 1988, Vitt and Price 1982, Warne and Charnov 2008, Nkosi et al. 2004, Amat 2008, Goldberg and Robinson 1979, Arnold 1994, Sinervo et al. 2010, Brain 1962, Mesquita et al. 2016, Schleicher 201…
Meroles ctenodactylus	NA	97	1.319963388	NA	NA	NA	NA	34.11019756	33.59206344	43.47590845	7.356328065	-0.000381337	-0.151021268	-0.001746434	0.014815373	-0.008047189	FitzSimons 1943, Branch 1998, Arnold 1998, Branch 2016, Edwards et al. 2016, Cunningham 2013
Meroles cuneirostris	33.6	58	0.660876009	NA	NA	NA	NA	33.6	33.54619224	43.35184871	8.798711757	-0.000662364	-0.162316073	-0.00132297	0.016706607	-0.007996546	Dunham and Miles 1985, FitzSimons 1943, Cox et al. 2003, Branch 1998, Pianka and Vitt 2003, Arnold 1998, Rogner 1997b, Dunham et al. 1988, Vitt and Price 1982, Nkosi et al. 2004, Amat 2008, Goldberg and Robinson 1979, Goldberg 2006, Schleicher 2015, Branch 2016, Edwards et al. 2016, Cunningham 2013
Meroles knoxii	NA	68	0.864733801	NA	NA	NA	NA	35.2888447	34.50423974	44.02284752	8.480120082	-0.000381337	-0.151021268	-0.001746434	0.014815373	-0.008047189	FitzSimons 1943, Branch 1998, Rogner 1997b, Haacke 1965, Branch 2016, Butler 2005, Edwards et al. 2016, Strauss 2016
Meroles micropholidotus	NA	68	0.864733801	NA	NA	NA	NA	34.11120374	33.76776221	43.50509671	8.360298557	-0.000662364	-0.162316073	-0.00132297	0.016706607	-0.007996546	FitzSimons 1943, Branch 1998, Arnold 1998, Edwards et al. 2016
Meroles reticulatus	NA	55	0.592810297	NA	NA	NA	NA	34.57565255	34.12708516	43.62034484	8.933204864	-0.001623055	-0.184416427	-0.002400406	0.024472579	-0.012117569	FitzSimons 1943, Branch 1998, Arnold 1998, Arnold 1994, Edwards et al. 2016
Meroles squamulosus	36.8	79	1.056897546	NA	NA	NA	NA	NA	NA	NA	NA	-0.001784655	-0.108218743	-0.00232646	0.025687656	-0.008537299	Huey and Pianka 1981, Fitch 1970, Spawls et al. 2002, FitzSimons 1943, Loveridge 1942, Branch 1998, Pianka 1986, Pianka and Vitt 2003, Broadley 1971, Jeffery 1993, Loveridge 1953, Auerbach 1987, Alexander and Marais 2007, Huey et al. 2001, Sinervo et al. 2010, Pienaar 1966, Goldberg 2008, Huey and Pianka 2007, Huey and Pianka 1977, Verwaijen and Van Damme 2007, Mesquita et al. 2016, Branch 2014, …
Meroles suborbitalis	38.8	71	0.920063387	NA	46	NA	NA	38.8	36.82582678	46	9.020040724	-0.000662364	-0.162316073	-0.00132297	0.016706607	-0.007996546	Huey and Pianka 1981, FitzSimons 1943, Branch 1998, Pianka 1986, Pianka and Vitt 2003, Rogner 1997b, Auerbach 1987, McBrayer 2004, Huey et al. 2001, Sinervo et al. 2010, Goldberg 2006, Huey and Pianka 2007, Curry-Lindahl 1979, Huey and Pianka 1977, Verwaijen and Van Damme 2007, Brattstrom 1965, Mesquita et al. 2016, Branch 2016, Butler 2005, Edwards et al. 2016, Huey and Pianka 2017, Pianka et al…
Mesalina adramitana	37.7	46	0.363798361	NA	NA	NA	NA	37.7	36.01966012	44.4469452	9.258676092	-0.000310148	-0.184111803	0.002004931	0.018422695	-0.006954313	Leviton et al. 1992, Arnold 1984, Arnold 1980, Schatti and Desvoignes 1999, Hornby 1996, van der Kooij 2001, Gardner 2013
Mesalina ayunensis	NA	43.5	0.292181797	NA	NA	NA	NA	35.32966658	34.65624349	43.68098255	9.364832856	-0.000496113	-0.229952752	0.002056166	0.022087059	-0.007768335	Arnold 1980, van der Kooij 2001, Gardner 2013
Mesalina bahaeldini	NA	52	0.520925867	NA	NA	NA	NA	35.21638007	34.5017759	43.62965533	8.857893189	-0.000899015	-0.174055694	0.000291468	0.024773912	-0.00886564	El Din 2006, Uetz 2006, Segoli et al. 2002
Mesalina bernoullii	NA	57	0.638586699	NA	NA	NA	NA	NA	NA	NA	NA	-0.000381468	-0.106425384	-0.001265784	0.015360518	-0.007266282	Smid et al. 2017
Mesalina brevirostris	35.8	60	0.70432434	NA	NA	NA	NA	35.8	34.77371117	43.80774012	8.466182365	-0.000316002	-0.141457159	5.90E-05	0.015503378	-0.007143493	Anderson 1999, Disi et al. 2001, Leviton et al. 1992, Gallagher 1971, Arnold 1984, El Din 2006, Vanhooydonck and Van Damme 1999, Khan 2006, Jongbloed 2000, Moravec 2004, Hornby 1996, Weber 1960, Werner 1973, Werner 1971, Fathinia et al. 2009, Gardner 2013, In den Bosch 2001, Werner 2016
Mesalina guttulata	34.9	70	0.901884316	NA	NA	NA	NA	34.9	34.16957777	43.50266003	8.010827953	-0.000217435	-0.129238277	0.000199134	0.014256266	-0.00640925	Frankenberg and Werner 1992, Smith 1935, Schleich et al. 1996, Amitai and Bouskila 2001, Fitch 1970, Szczerbak 2003, Minton 1966, Perry and Garland 2002, Disi et al. 2001, Perez-Mellado 1992, Leviton et al. 1992, Geniez et al. 2004, Flower 1933, El Din 2006, Parker 1942, Arnold 1998, Vanhooydonck and Van Damme 1999, Schatti and Desvoignes 1999, Le Berre 1989, Bons and Geniez 1996, Moravec and Mod…
Mesalina kuri	NA	57	0.638586699	NA	NA	NA	NA	36.00143868	34.91720649	43.87738771	8.615558798	NA	NA	NA	NA	NA	Joger and Mayer 2002, Razzetti et al. 2011
Mesalina martini	NA	50	0.470660483	NA	NA	NA	NA	35.04142731	34.41844475	43.57597178	8.964924683	-0.000430116	-0.159642335	0.001359937	0.018803692	-0.005258337	Largen 1997, El Din 2006, Schatti and Desvoignes 1999, Ineich 1999, Largen and Spawls 2010
Mesalina microlepis	NA	55	0.592810297	NA	NA	NA	NA	NA	NA	NA	NA	-0.000508861	-0.107322132	-0.002844808	0.014827895	-0.009165702	Smid et al. 2017
Mesalina olivieri	33.4	52	0.520925867	NA	NA	NA	NA	33.4	33.43588349	43.03922091	8.818211193	-0.000444346	-0.142407864	-0.000929844	0.016890645	-0.007954433	Schleich et al. 1996, Clobert et al. 1998, Amitai and Bouskila 2001, Disi et al. 2001, Perez-Mellado 1992, Geniez et al. 2004, Pianka and Vitt 2003, El Din 2006, Le Berre 1989, Bons and Geniez 1996, Brown and Nagy 2007, Castanet 1994, Cisse and Karns 1978, Bar and Haimovitch 2012, Trape et al. 2012, Ibrahim 2001, Goldberg 2013, In den Bosch 2001, Werner 2016
Mesalina pasteuri	NA	50	0.470660483	NA	NA	NA	NA	34.06275876	33.84414019	43.25784476	8.943543959	-0.000115654	-0.116374564	0.000559474	0.013031415	-0.005791372	Schleich et al. 1996, Geniez et al. 2004, El Din 2006, Bons and Geniez 1996, Trape et al. 2012, In den Bosch 2001
Mesalina rubropunctata	NA	67	0.845746743	NA	NA	NA	NA	35.46637424	34.52353267	43.69032531	8.147005364	-0.00021028	-0.137055017	-0.000214972	0.014386678	-0.007013824	Schleich et al. 1996, Geniez et al. 2004, Flower 1933, Papenfuss 1969, El Din 2006, Le Berre 1989, Werner and Ashkenazi 2010, Trape et al. 2012, In den Bosch 2001, Werner 2016
Mesalina saudiarabica	NA	NA	NA	NA	NA	NA	NA	NA	NA	NA	NA	-0.000378196	-0.171935301	0.000955698	0.016815911	-0.007048896	Smid et al. 2017
Mesalina watsonana	NA	60	0.70432434	NA	NA	NA	NA	35.48100475	34.58651763	43.70404719	8.459213356	-0.000403459	-0.11316083	-0.001013646	0.014962559	-0.007399782	Anderson 1999, Tikader and Sharma 1992, Arnold 1998, Khan 2006, Anderson 1963, Clark 1990, Yousefkhani et al. 2013, Leviton 1959, Khan 2015
Mesaspis antauges	NA	85.2	0.95292979	NA	NA	NA	NA	24.71848331	28.05472113	39.34739099	6.852536265	-0.000969506	0.099148063	-0.015053792	0.005949384	-0.013197224	Zaldivar Riveron et al. 2002, Solano-Zavaleta et al. 2017
Mesaspis juarezi	NA	77	0.799987724	NA	NA	NA	NA	24.03025557	27.70968432	39.13337136	7.174794181	-0.000969506	0.099148063	-0.015053792	0.005949384	-0.013197224	Cooper and Habegger 2000, Karges and Wright 1987, Ramirez-Pinilla et al. 2009, Zaldivar Riveron et al. 2002, Garcia-Padilla and Mata-Silva 2014
Mesaspis monticola	23.7	88	1.001799699	NA	NA	NA	NA	23.7	27.4382541	39.01322341	6.72250961	NA	NA	NA	NA	NA	Fitch 1970, 1973, Cox et al. 2003, Kohler 2003, Tihen 1954, Greene et al. 2006, Dunham et al. 1988, Fitch 1982, Cree and Guillette 1995, Van Wyk 1991, Vial and Stewart 1985, Pough et al. 2003
Mesaspis moreletii	NA	96	1.133303891	NA	NA	NA	NA	25.36672258	28.36573984	39.54667275	6.468907013	-0.001689936	0.027808051	-0.007383977	0.022256729	-0.009721326	Fitch 1970, Wiens and Slingluff 2001, Kohler 2003, Cooper and Habegger 2000, Greene et al. 2006, Kohler et al. 2006, Rand 1957, Leenders and Watkins-Colwell 2004, Townsend and Wilson 2008, Zaldivar Riveron et al. 2002, Solis et al. 2015
Mesoscincus schwartzei	NA	125	1.645922432	NA	NA	NA	NA	29.87981036	30.46333472	41.88837319	7.531159664	-0.001689936	0.027808051	-0.007383977	0.022256729	-0.009721326	Campbell 1999, Stafford and Meyer 2000, Lee 2000, Kohler 2008, Garcia-Vazquez and Feria-Ortiz 2006, Duellman 1963, Duellman 1965, Percino-Daniel et al. 2012
Micrablepharus atticolus	34.6	48	0.373458566	NA	NA	NA	NA	34.6	33.75675959	43.04240513	10.60019732	-0.002319895	-0.042340423	-0.003763816	0.029346034	-0.009005748	Gainsbury and Colli 2003, Nogueira et al. 2005, Colli et al. 2002, Vieira et al. 2000, Mesquita et al. 2016, Sousa et al. 2015, Ribeiro-Junior and Amaral 2017, Silva et al. 2017
Micrablepharus maximiliani	29.1	44.7	0.271315441	NA	NA	NA	NA	29.1	30.56852701	41.26104513	10.70530333	-0.002263111	-0.05508537	-0.002115384	0.030759935	-0.008562581	Wiens et al. 2006, Vitt and Caldwell 1993, Avila-Pires 1995, Mesquita et al. 2006b, Gainsbury and Colli 2003, Bartlett and Bartlett 2003, Colli et al. 2002, Delfim and Freire 2007, Rodrigues 2003, Vitt 1991, Vanzolini et al. 1980, Sinervo et al. 2010, Kohler 2005, Moura et al. 2010, Dal Vechio et al. 2014, Smith 2012, Camacho et al. 2015, Travassos et al. 2015, Ribeiro-Junior and Amaral 2017
Microlophus albemarlensis	35.4	125	1.817498325	NA	NA	NA	NA	35.4	34.4	43.07484044	8.195408026	NA	NA	NA	NA	NA	Tinkle et al. 1970, Fitch 1970, 1982, 1985, Perry and Garland 2002, Cox et al. 2003, Van Denburgh and Slevin 1913, Nagy et al. 1999, Dunham et al. 1988, Brown and Nagy 2007, Fitch 1982, Sinervo et al. 2010, Kohler 2005, Vitt and Goldberg 1983, Goldberg and Rodriguez 1986, Turner 1977, Curry-Lindahl 1979. Huey 1974, Stebbins et al. 1967, Zug 2013, Snell et al. 1988, Mesquita et al. 2016, Clark et …
Microlophus barringtonensis	34.8	95	1.493430483	NA	NA	NA	NA	NA	NA	NA	NA	NA	NA	NA	NA	NA	Reptilia Web Ecuador (http://zoologia.puce.edu.ec/vertebrados/Reptiles/FichaEspecie.aspx?Id=8138), Carpenter 1970
Microlophus bivittatus	NA	105	1.611613704	NA	NA	NA	NA	34.5562822	34.20306245	42.86574056	8.609377292	NA	NA	NA	NA	NA	Van Denburgh and Slevin 1913, Zug 2013, Clark et L. 2016, Stone et al. 2003, Moore et al. 2017
Microlophus duncanensis	33.7	100	1.554	NA	NA	NA	NA	33.7	33.54064287	42.54771887	8.735732658	NA	NA	NA	NA	NA	Van Denburgh and Slevin 1913, Zug 2013
Microlophus habelii	34.8	115	1.719037428	NA	NA	NA	NA	34.8	34.30475996	42.93815315	8.37779295	NA	NA	NA	NA	NA	Cox et al. 2003, Van Denburgh and Slevin 1913, Zug 2013, Carpenter 1970
Microlophus pacificus	33.7	105	1.611613704	NA	NA	NA	NA	33.7	33.5383842	42.54880219	8.606705555	NA	NA	NA	NA	NA	Cooper and Vitt 2002, Van Denburgh and Slevin 1913, Swash and Still 2005, Zug 2013, IUCN, Carpenter 1970, Moore et al. 2017
Microlophus tarapacensis	NA	110.4	1.670832911	NA	NA	NA	NA	33.9218664	33.82157174	42.65899315	8.463574878	-0.000573088	0.285063277	-0.021641038	0.001232182	-0.015828872	Donoso-Barros 1966, Ortiz-Zapata 1980, Vidal and Labra 2008, Demangel 2016
Mochlus mabuiiforme	NA	223	2.457676403	NA	NA	NA	NA	31.98309048	30.66312247	41.55298666	3.62906543	-0.000950961	-0.153876936	0.002141953	0.026742193	-0.006183275	Spawls et al. 2002, Loveridge 1936, Greer 1977a, Gans et al. 1965
Moloch horridus	34.1	122	1.792147274	36.7	42.5	3.5	NA	34.1	36.7	42.5	3.5	-0.000574131	-0.162833624	-0.000729646	0.018813979	-0.009207791	Dunham and Miles 1985, Fitch 1970, Huey and Pianka 1981, Cogger 2000, Melville et al. 2006, Pianka and Parker 1975, Pianka 1986, Pianka and Vitt 2003, Wilson and Swan 2003, Henle 1991, Greer 1989, Manthey and Schuster 1996, Dunham et al. 1988, Brown and Nagy 2007, Vitt and Price 1982, Wilson and Swan 2008, Huey et al. 2001, Chapman and Dell 1985, Sinervo et al. 2010, Kohler 2005, Bush 1992, Huey …
Morethia adelaidensis	NA	60	0.616650387	NA	NA	NA	NA	32.39815888	31.88583162	42.29292823	6.172834635	-0.000477177	-0.189952969	-1.36E-05	0.019366056	-0.009113166	Shine and Greer 1991, Cogger 2000, Brown 1991, Wilson and Swan 2003, Greer 1989, Greer 2005, James and Shine 1988, Henle 1989c, Kohler 2005, Michael and Lindenmayer 2010, Swanson 2007, Greer 1980, Swan and Watharow 2005, Brown 2012, Swan et al. 2017
Morethia boulengeri	34.1	57	0.544719909	34.1	NA	NA	NA	34.1	34.1	43.13333741	6.251213071	-0.000832571	-0.131705966	-0.001637024	0.020584152	-0.00929293	Clobert et al. 1998, Shine and Greer 1991, Cogger 2000, Brown 1991, Wilson and Swan 2003, Henle 1991, Greer 1989, Greer 2005, Dunham et al. 1988, Warne and Charnov 2008, James and Shine 1988, Taylor 1985, Fischer and Lindenmayer 2005, Henle 1990, Henle 1989b, Henle 1989c, Henle 1991, Horner 1999, Read 1999, Sinervo et al. 2010, Kohler 2005, Michael et al. 2010, Michael and Lindenmayer 2010, Hutch…
Morethia butleri	33.6	57	0.544719909	NA	44.6	NA	NA	33.6	33.26213434	44.6	7.690798002	-0.000450046	-0.177516775	-0.000116361	0.018540508	-0.008257779	Huey and Pianka 1981, Shine and Greer 1991, Cogger 2000, Pianka 1986, Wilson and Swan 2003, Greer 1989, Greer 2005, James and Shine 1988, Huey et al. 2001, Kohler 2005, Pianka 2011, Brown 2012
Morethia lineoocellata	NA	57	0.544719909	NA	44.6	NA	NA	32.61455215	31.37758859	44.6	5.965541949	-0.000819573	-0.148718061	-0.001672141	0.020363491	-0.009946471	Shine and Greer 1991, Cogger 2000, Wilson and Swan 2003, Greer 1989, Greer 2005, James and Shine 1988, Davidge 1979, Bustard 1968, Kohler 2005, Bush et al. 2010, Bustard 1968, Brown 2012, Wilson and Swan 2009
Morethia obscura	34.7	56	0.519899139	NA	42.3	NA	NA	34.7	33.02234009	42.3	5.915421669	-0.001049392	-0.157001115	-0.00178906	0.022785877	-0.011330459	Shine and Greer 1991, Cogger 2000, Wilson and Swan 2003, Henle 1991, Greer 1989, Greer 2005, James and Shine 1988, Chapman and Dell 1985, Kohler 2005, Bush et al. 2010, Bush 1992, Swan and Watharow 2005, Brown 2012, Pianka 2014, Swan et al. 2017
Morethia ruficauda	NA	46	0.244045038	NA	42	NA	NA	32.05924132	31.76082221	42	6.84325738	-0.000705726	-0.160283261	0.000405375	0.021063688	-0.008202095	Shine and Greer 1991, Cogger 2000, Wilson and Swan 2003, Greer 1989, Greer 2005, James and Shine 1988, Horner 1999, Kohler 2005, Swanson 2007, Gordon et al. 2010, Moro and MacAulay 2010, Brown 2012
Morethia storri	NA	38	-0.023878767	NA	NA	NA	NA	32.16383317	31.99470959	42.25736711	7.580317524	-0.00161345	-0.154813531	0.003924584	0.033590744	-0.006303651	Shine and Greer 1991, Cogger 2000, Wilson and Swan 2003, Greer 1989, Greer 2005, James and Shine 1988, James and Shine 1988, Horner 1999, Kohler 2005, Swanson 2007, Sadlier 1990, Greer 1980, Brown 2012
Morethia taeniopleura	NA	44	0.181708692	NA	NA	NA	NA	32.23904353	31.95976357	42.26878099	7.128564737	-0.001702219	-0.081261709	-0.002264822	0.026367499	-0.009472365	Shine and Greer 1991, Cogger 2000, Wilson and Swan 2003, Greer 1989, Greer 2005, James and Shine 1988, Kohler 2005, Swanson 2007, Brown 2012
Morunasaurus annularis	NA	137	1.896384799	NA	NA	NA	NA	29.02444842	29.7912818	40.7365616	7.742978602	-0.00161255	-0.009353383	-0.004595534	0.024463522	-0.009768894	Kohler 2003, Kohler 2008, Kohler 2005, Torres-Carvajal et al. 2011
Morunasaurus groi	NA	110	1.587236478	NA	NA	NA	NA	28.91135224	29.84383123	40.71939819	8.422293461	-0.001440667	-0.009214351	-0.004961733	0.022968085	-0.008801853	Kohler 2003, Kohler 2008, Torres-Carvajal et al. 2011
Morunasaurus peruvianus	NA	153	2.05195431	NA	NA	NA	NA	29.08136064	29.7648379	40.74519856	7.401134014	-0.001137635	0.111196329	-0.014642869	0.011299116	-0.013550519	Kohler 2003b, Kohler 2008, Torres-Carvajal et al. 2011
Notoscincus butleri	NA	42	0.116471959	NA	NA	NA	NA	28.57320315	29.50366971	39.49455915	8.930049467	-0.000504357	-0.15241127	-0.000299697	0.016978883	-0.008167582	Cogger 2000, Wilson and Swan 2003, Wilson and Swan 2008, Horner 1999, Doughty et al. 2011
Notoscincus ornatus	NA	39	0.012547616	NA	NA	NA	NA	28.53518436	29.5213349	39.48878944	9.158410242	-0.000774741	-0.155523416	0.000647953	0.021820988	-0.007925331	Cogger 2000, Shine and Greer 1991, Wilson and Swan 2003, Greer 1989, Greer 2005, Greer 1974, Wilson and Swan 2008, Kohler 2005, Swanson 2007, Sadlier 1990, Doughty et al. 2011
Nucras boulengeri	NA	65	0.806907315	NA	NA	NA	NA	35.36594426	34.42933673	43.62844644	8.314296533	-0.001927222	-0.073632693	-0.002540946	0.027295043	-0.010174972	Spawls et al. 2002, Razzetti and Msuya 2002, Broadley 1971, Branch 2005, Loveridge 1955, Kohler 2005, Haagner et al. 2000, Branch 2014
Nucras holubi	NA	51.2	0.501055655	NA	NA	NA	NA	37.12653023	35.58013662	44.22013512	9.027274905	-0.001806357	-0.137729993	-0.002047435	0.025797844	-0.008884265	Edwards et al. 2013, Edwards 2013
Nucras intertexta	38.9	94	1.279700296	NA	NA	NA	NA	38.9	36.32133536	44.74725563	7.348821907	-0.0011867	-0.167291154	-0.001417184	0.021303722	-0.008961018	Fitch 1970, FitzSimons 1943, Branch 1998, Pianka 1986, Rogner 1997b, Auerbach 1987, Meik et al. 2002, Sinervo et al. 2010, Pienaar 1966, van der Meer et al. 2010, Huey and Pianka 1977, Jacobsen 1982, Verwaijen and Van Damme 2007, Edwards et al. 2013, Kirchhof et al. 2010, Edwards 2013
Nucras lalandii	NA	120	1.592663857	NA	NA	NA	NA	37.31059397	35.26825203	44.21075998	6.623898907	-0.000925961	0.024921231	-0.01204692	0.012045256	-0.014375062	Fitch 1970, FitzSimons 1943, Branch 1998, Kohler 2005, van der Meer et al. 2010, Bogin et al. 1999, Edwards et al. 2013, Branch 2016, Edwards 2013
Nucras ornata	NA	111	1.49274811	NA	NA	NA	NA	37.56201538	35.45422526	44.29882188	6.849742582	-0.002149268	-0.093499199	-0.001985368	0.029551589	-0.00910965	van der Meer et al. 2010, Edwards et al. 2013, Loveridge 1953, Branch 2016, Broadley 1962, Edwards 2013
Nucras taeniolata	NA	111	1.49274811	NA	NA	NA	NA	38.76592693	36.16070746	44.69016663	6.876044133	-0.000859519	-0.084590479	-0.006214072	0.016255999	-0.011917338	Spawls et al. 2002, Branch 1998, Broadley 1971, Auerbach 1987, van der Meer et al. 2010, Jacobsen 1982, Edwards et al. 2013, Branch 2016
Nucras tessellata	40	94	1.279700296	NA	NA	NA	NA	40	36.96683994	45.10482279	7.372853329	-0.000381337	-0.151021268	-0.001746434	0.014815373	-0.008047189	Huey and Pianka 1981, FitzSimons 1943, Branch 1998, Pianka and Vitt 2003, Pianka 1986, Pianka 1986, Pianka and Vitt 2003, Auerbach 1987, Vitt and Price 1982, Huey et al. 2001, Sinervo et al. 2010, Pienaar 1966, van der Meer et al. 2010, Huey and Pianka 2007, Huey and Pianka 1977, Verwaijen and Van Damme 2007, Edwards et al. 2013, Mesquita et al. 2016, Branch 2016, Butler 2005, Huey and Pianka 201…
Oligosoma aeneum	22	66.6	0.762998286	NA	NA	NA	NA	22	24.97569347	38.03882908	4.35215299	-0.000767821	0.188519747	-0.020215805	0.001405574	-0.016735653	Tinkle et al. 1970, Fitch 1970, Cree 1994, Chapple et al. 2008, Hare 2005, Jewell 2008, Towns 1999, Freeman 1997, Hare et al. 2010, Towns and Elliot 1996, Tingley et al. 2013, Towns 1985, Hare et al. 2016, Hare and Cree 2016
Oligosoma burganae	NA	67.1	0.773487018	NA	NA	NA	NA	23.57481864	25.89579765	38.55007632	4.363426147	NA	NA	NA	NA	NA	Chapple et al. 2011, Tingley et al. 2013
Oligosoma chloronoton	NA	125	1.645922432	NA	NA	NA	NA	23.19476253	25.34161998	38.3490897	2.328675489	-0.000767821	0.188519747	-0.020215805	0.001405574	-0.016735653	Robb 1980, Whitaker et al. 2002, Jewell 2008, Greaves et al. 2007, Mules 2012, Tingley et al. 2013
Oligosoma elium	NA	89.2	1.172728115	NA	NA	NA	NA	NA	NA	NA	NA	-0.000767821	0.188519747	-0.020215805	0.001405574	-0.016735653	Melzer et al. 2017
Oligosoma hardyi	NA	62	0.662632765	NA	NA	NA	NA	22.90240131	25.54384926	38.3385277	4.593210375	NA	NA	NA	NA	NA	Chapple et al. 2008, Tingley et al. 2013
Oligosoma infrapunctatum	NA	115	1.528993327	NA	NA	NA	NA	25.43293187	26.69556744	39.10617806	2.737850858	-0.000767821	0.188519747	-0.020215805	0.001405574	-0.016735653	Robb 1980, Whitaker and Lyall 2004, Towns et al. 2002, Jewell 2008, Tingley et al. 2013, Hare et al. 2016
Oligosoma kokowai	NA	90.3	1.189915746	NA	NA	NA	NA	NA	NA	NA	NA	-0.000767821	0.188519747	-0.020215805	0.001405574	-0.016735653	Melzer et al. 2017
Oligosoma levidensum	NA	50.8	0.383233927	NA	NA	NA	NA	22.88856924	25.64320567	38.3517451	5.209085291	NA	NA	NA	NA	NA	Chapple et al. 2008, Tingley et al. 2013
Oligosoma lineoocellatum	22	111	1.479347899	NA	NA	NA	NA	22	24.70458108	37.97127963	2.669931868	-0.000767821	0.188519747	-0.020215805	0.001405574	-0.016735653	Robb 1980, Cooper and Vitt 2002, Towns et al. 2002, Jewell 2008, Greaves et al. 2007, Mules 2012, Lettink et al. 2010, Hare et al. 2016
Oligosoma polychroma	NA	79	1.002437878	NA	NA	NA	NA	23.64190084	25.85274414	38.52919375	3.729619853	-0.000767821	0.188519747	-0.020215805	0.001405574	-0.016735653	Jewell 2008, Patterson and Daugherty 1990, Freeman 1997, Hare et al. 2010, Lettink et al. 2011, Towns and Elliot 1996, Tingley et al. 2013, Cree and Hare 2016, Hare et al. 2016
Oligosoma prasinum	NA	94	1.246229839	NA	NA	NA	NA	NA	NA	NA	NA	-0.000767821	0.188519747	-0.020215805	0.001405574	-0.016735653	Melzer et al. 2017
Oligosoma roimata	NA	63.6	0.698363026	NA	NA	NA	NA	23.54733592	25.90856732	38.54590556	4.528501743	NA	NA	NA	NA	NA	Patterson et al. 2013
Oligosoma stenotis	NA	75	0.929572819	NA	NA	NA	NA	23.65407938	25.88993955	38.52769556	3.843957998	NA	NA	NA	NA	NA	Patterson and Daugherty 1994, Jewell 2008, Tingley et al. 2013
Oligosoma taumakae	NA	96	1.275753811	NA	NA	NA	NA	25.55513333	26.86468894	39.16195618	3.299006745	NA	NA	NA	NA	NA	Chapple and Patterson 2007, Jewell 2008, Tingley et al. 2013, Lettink et al. 2010, Lettink et al. 2013
Oligosoma tekakahu	NA	79	1.002437878	NA	NA	NA	NA	23.94386109	26.03547038	38.59977472	3.608634911	NA	NA	NA	NA	NA	Chapple et al. 2011, Tingley et al. 2013
Oligosoma zelandicum	25.2	73	0.891669515	NA	NA	NA	NA	25.2	26.80403038	39.07086681	4.13829524	-0.000767821	0.188519747	-0.020215805	0.001405574	-0.016735653	Tinkle et al. 1970, Fitch 1970, Perry and Garland 2002, Robb 1980, Whitaker and Lyall 2004, Cree 1994, Dunham et al. 1988, Towns et al. 2002, Hare 2005, Jewell 2008, Hare et al. 2010, Heatwole and Taylor 1987, Towns and Elliot 1996, Whitaker 1968, Morris 1974, Tingley et al. 2013, Mesquita et al. 2016, Towns 1985, Hare et al. 2016
Ophisaurus attenuatus	32	359	2.165333145	NA	NA	NA	NA	32	31.65758047	41.59031366	4.887725924	-0.001310119	0.020771913	-0.008445885	0.020272032	-0.012708403	Fitch 1970, 1985, Cox et al. 2003, Conant and Collins 1998, McConkey 1954, Pianka and Vitt 2003, Greene et al. 2006, Johnson and Voigt 1978, Cooper and Bradley 2009, Sinervo et al. 2010, Kohler 2005, Jensen et al. 2008, Beane et al. 2010, Fitch 1956, Brattstrom 196, Hibbitts and Hibbitts 2015, Minton 2004, LeClere 2013
Ophisaurus compressus	NA	195	1.398780096	NA	NA	NA	NA	28.71552423	30.0250385	40.57125736	6.506501953	-0.001695977	-0.009186321	-0.00260462	0.026843579	-0.009373668	Conant and Collins 1998, McConkey 1954, Pianka and Vitt 2003, Bartlett 1985, Greene et al. 2006, Holman 1971, Jensen et al. 2008, Kohler 2005, Beane et al. 2010
Ophisops beddomei	NA	37	0.084763288	NA	NA	NA	NA	34.13395813	34.01396184	43.28326392	9.784393689	-0.001236481	-0.156358089	0.001807747	0.02658484	-0.006893411	Tikader and Sharma 1992, Boulenger 1890, Srinivasulu et al. 2014, Sharma 1976
Ophisops elegans	33.1	70	0.901884316	NA	NA	NA	NA	33.1	33.09289887	42.89535958	7.959752952	-0.000798609	-0.080654367	-0.005170826	0.016102886	-0.010513208	Frankenberg and Werner 1992, Schleich et al. 1996, Amitai and Bouskila 2001, Arnold and Ovenden 2004, Szczerbak 2003, Anderson 1999, Disi et al. 2001, Baran and Atatur 1998, El Din 2006, Rogner 1997b, Reed and Marx 1959, Le Berre 1989, Khan 2006, Atatur and Gocmen 2001, Ahmadzadeh et al. 2008, Valakos et al. 2008, Valakos et al. 2004, Pafilis et al. 2009, Moravec 1998, Arbel 1984, Weber 1960, Kwe…
Ophisops jerdonii	NA	49	0.444768632	NA	NA	NA	NA	34.26565941	33.95276767	43.30325082	8.993326866	-0.001030921	-0.118049076	0.002295424	0.023381308	-0.00550006	Smith 1935, Minton 1966, Daniel 1983, Tikader and Sharma 1992, Khan 2006, Clark 1990, Das 2002, Masroor 2012, Agarwal et al. 2015, Srinivasulu et al. 2014, Das and Das 2017
Ophisops microlepis	NA	65	0.806907315	NA	NA	NA	NA	34.39814113	33.89121088	43.32335617	8.197572298	-0.000998487	-0.134620498	0.002146683	0.023378226	-0.005827926	Tikader and Sharma 1992, Srinivasulu et al. 2014, Vivek et al. 2015
Ophisops minor	NA	50	0.470660483	NA	NA	NA	NA	34.27513146	33.94836654	43.3046883	8.936432755	-0.001991628	-0.113443304	0.000235997	0.030854142	-0.0081023	Vanhooydonck and Van Damme 1999, Somaweera and Somaweera 2009, Srinivasulu et al. 2014
Ophisops occidentalis	NA	48	0.418342891	NA	NA	NA	NA	33.56576671	33.55221991	43.07741833	9.036314956	-0.000427007	-0.164600329	-0.00259027	0.017686961	-0.009730333	Schleich et al. 1996, El Din 2006, Rogner 1997b, Bons and Geniez 1996
Oreosaurus achlyens	NA	88	1.242681783	NA	NA	NA	NA	NA	NA	NA	NA	NA	NA	NA	NA	NA	Uzzell 1958, Lotzkat 2007, Test et al. 1966
Oreosaurus mcdiarmidi	NA	62.2	0.74509585	NA	NA	NA	NA	NA	NA	NA	NA	-0.002686027	-0.005714998	-0.00356604	0.030631827	-0.007207166	Kok and Rivas 2011
Otocryptis beddomei	NA	45	0.447224855	NA	NA	NA	NA	28.14166988	30.57600707	41.0940873	10.27102468	-0.001991628	-0.113443304	0.000235997	0.030854142	-0.0081023	Smith 1935, Tikader and Sharma 1992, Boulenger 1890, Erdelen 1998, Inger et al. 1984, Das 2002, Manthey 2010, Chandramouli and Ganesh 2011, Chandramouli 2009, Jose et al. 2007, Srinivasulu et al. 2014, Venugopal 2013
Otocryptis nigristigma	NA	80	1.22309441	NA	NA	NA	NA	26.94487937	29.57525818	40.6558678	8.533801245	NA	NA	NA	NA	NA	Bahir and Silva 2005, Somaweera and Somaweera 2009, Manthey 2010, de Silva and Ukuwela 2017
Otocryptis wiegmanni	26.1	80	1.22309441	NA	NA	NA	NA	26.1	29.07946409	40.38123042	8.515343379	NA	NA	NA	NA	NA	Fitch 1970, Ranawana and Bambaradenyia 1998, Erdelen 1998, Bahir and Silva 2005, Bahir and Silva 2005, Rogner 1997a, Deraniyagala 1953, Manthey and Schuster 1996, Somaweera and Somaweera 2009, Kohler 2005, Manthey 2010, Das and de Silva 2011, Taylor 1953, Meek et al. 2005, Jansen and Bopage 2011, de Silva and Ukuwela 2017, Das and Das 2017
Otosaurus cumingi	NA	156.5	1.96108681	NA	NA	NA	NA	28.14019116	28.36973101	38.8536954	4.737005235	NA	NA	NA	NA	NA	Pianka and Vitt 2003, Brown and Alcala 1980, Brown et al. 1996, Kohler 2005, Alcala 1986, Auffenberg and Auffenberg 1989, Auffenberg and Auffenberg 1988, McLeod et al. 2011, Devan-Song and Brown 2012, Del Prado et al. 2018
Palleon lolontany	NA	32	0.036801942	NA	NA	NA	NA	30.65845001	31.57761811	41.73918876	10.74951504	NA	NA	NA	NA	NA	Carpenter and Robson 2005, Raxworthy and Nussbaum 1995, Raselimanana and Rakotomalala 2004, Glaw and Vences 2007, Necas 1999
Panaspis africanus	NA	42.5	0.133067855	NA	NA	NA	NA	NA	NA	NA	NA	NA	NA	NA	NA	NA	Soares 2015, Pollo 2017, Soares et al. 2018
Panaspis breviceps	NA	70	0.832821571	NA	NA	NA	NA	29.7990845	29.48299355	40.78162442	5.349633343	-0.00286804	0.009132541	-0.00920759	0.026987535	-0.007918015	Parker 1936, Schmidt et al. 1919, Fuhn 1972, Chirio and LeBreton 2007, Pauwels and Vande weghe 2008, Gonwouo et al. 2007, Reid 1986, Pauwels et al. 2004, Scott 1982, Trape et al. 2012, Carlino and Pauwels 2015, Portik et al. 2016
Panaspis cabindae	NA	42	0.116471959	NA	NA	NA	NA	29.53702128	29.60475957	40.74185387	6.923722229	-0.002839023	-0.038061937	-0.003091505	0.031872816	-0.008709173	Parker 1936, Schmidt et al. 1919
Panaspis maculicollis	NA	45	0.213223207	NA	NA	NA	NA	NA	NA	NA	NA	-0.001746351	-0.155109051	0.001105454	0.031516552	-0.007511231	Jacobsen and Broadley 2000, Alexander and Marais 2007, Branch 2016
Panaspis nimbaensis	NA	68	0.792171279	NA	NA	NA	NA	29.78421334	29.48990333	40.77936758	5.438957287	-0.002868106	-0.034497011	-0.003718979	0.032195369	-0.007618409	Clobert et al. 1998, Fitch 1982, Hughes 1988, Fuhn 1972, Dunham et al. 1988, Fitch 1982, Barbault 1976, Barbault 1974, Leache 2005, Turner 1977, Bohme et al. 2011, Turner 1977, Damuth 1987, Barbault 1974, Mesquita et al. 2016
Panaspis tancredi	NA	28	-0.452126717	NA	NA	NA	NA	29.32901	29.7014107	40.71028621	8.173146867	-0.001986855	-0.190924256	-0.001238254	0.027462244	-0.008341362	Largen and Spawls 2010, Jackson and Blackburn 2010
Panaspis thomensis	NA	47.7	0.294935846	NA	NA	NA	NA	NA	NA	NA	NA	NA	NA	NA	NA	NA	Soares et al. 2018 (See also Soares 2015)
Panaspis togoensis	NA	55	0.494631124	NA	NA	NA	NA	29.67536379	29.54047959	40.76284864	6.092764649	-0.002173724	-0.07880579	0.000456613	0.03253028	-0.006959233	Greenbaum and Carr 2005, Hughes 1988, Chirio and LeBreton 2007, Leache et al. 2006, Reid 1986, Trape et al. 2012 (Kitsoni: Clobert et al. 1998, Fitch 1982, Hughes 1988, Fuhn 1972, Dunham et al. 1988, Fitch 1982, Barbault 1976, Barbault 1974, Leache 2005, Turner 1977, Bohme et al. 2011, Turner 1977, Damuth 1987, Barbault 1974), Segniagbeto et al. 2015
Panaspis wahlbergi	33	64	0.707155136	NA	NA	NA	NA	NA	NA	NA	NA	-0.001659631	-0.013680985	-0.007134569	0.019622698	-0.011472252	Fitch 1970, Fitzsimons 1943, Spawls et al. 2002, Loveridge 1936, 1942, Branch 1998, Razzetti and Msuya 2002, Broadley 1971, Parker 1942, Loveridge 1953, Auerbach 1987, Jacobsen and Broadley 2000, Barbour and Loveridge 1928, Branch 2005, Alexander and Marais 2007, Loveridge 1955, Fitch 1982, Sinervo et al. 2010, Kohler 2005, Largen and Spawls 2010, Pienaar 1966, Haagner et al. 2000, Bowker 1984, J…
Pantepuisaurus rodriguesi	NA	58.3	0.652237568	NA	NA	NA	NA	29.47516688	30.64215806	41.35884711	9.87342625	-0.002686027	-0.005714998	-0.00356604	0.030631827	-0.007207166	Kok 2009
Papuascincus morokanus	NA	52	0.415974797	NA	NA	NA	NA	28.25174958	28.99701086	38.84579385	8.043479268	-0.001540553	0.005064302	-0.004075824	0.024434791	-0.008609734	Allison and Greer 1986, Allison 1982
Papuascincus stanleyanus	29	60	0.616650387	NA	NA	NA	NA	29	29.35890918	39.07629825	7.61726269	-0.001647125	0.010679998	-0.006458986	0.023025959	-0.00881249	Zweifel 1980, de Rooij 1915, Greer 1974, Allison and Greer 1986, Mys 1988, Allison 1982, Woodruff 1972
Paracontias hildebrandti	NA	50	-0.29936899	NA	NA	NA	NA	29.33772011	31.12093422	42.15134807	11.96694968	NA	NA	NA	NA	NA	Raselimanana and Rakotomalala 2004, Glaw and Vences 2007, Goodman et al. 2017
Parvilacerta fraasii	NA	60	0.70432434	NA	NA	NA	NA	32.49352631	33.21972297	42.98300419	7.329105312	-0.000508861	-0.107322132	-0.002844808	0.014827895	-0.009165702	Arnold 1998, Uetz 2006, Boulenger 1920, Nassar et al. 2013
Parvilacerta parva	NA	62	0.746347876	NA	NA	NA	NA	32.50889985	33.21257975	42.98533727	7.236763836	-0.001029939	-0.09603541	-0.006084283	0.01686912	-0.011298256	Szczerbak 2003, Baran and Atatur 1998, Vanhooydonck and Van Damme 1999, Arnold 1998, Rogner 1997b, Kumluta et al. 2004, Kohler 2005, Arakelyan et al. 2011, Franzen et al. 2008, Yakin et al. 2012
Parvoscincus decipiens	NA	45	0.213223207	NA	32.9	NA	NA	24.64878903	26.20259827	35.48013397	6.87719925	NA	NA	NA	NA	NA	Brown and Alcala 1980, Alcala 1986, Smith 1993, McLeod et al. 2011, Taylor 1923, Linkem and Brown 2013
Parvoscincus steerei	NA	42	0.116471959	NA	NA	NA	NA	25.73614169	27.26276147	36.98339268	7.911775595	NA	NA	NA	NA	NA	Shine and Greer 1991, Greer 1977, Brown and Alcala 1961, Brown and Alcala 1980, Brown et al. 1996, Alcala 1986, Turner 1977, Smith 1993, McLeod et al. 2011, Gaulke 2011, Ferner et al. 2000, Sanguila et al. 2016, Goldberg 2017
Pedioplanis breviceps	NA	46	0.363798361	NA	NA	NA	NA	36.05231121	35.09754628	44.16191858	9.503327449	-0.001623055	-0.184416427	-0.002400406	0.024472579	-0.012117569	Branch 1998, Rogner 1997b, Cunningham et al. 2012
Pedioplanis burchelli	NA	62.9	0.764818055	NA	NA	NA	NA	35.66284863	34.69387165	43.94786763	8.567173084	-0.000859519	-0.084590479	-0.006214072	0.016255999	-0.011917338	FitzSimons 1943, Branch 1998, Uetz 2006, Nkosi et al. 2004, Amat 2008, Kohler 2005, Goldberg 2006, Branch 2016
Pedioplanis lineoocellata	38.4	67	0.845746743	NA	45.6	NA	NA	38.4	36.52724749	45.6	8.98366561	-0.000941407	-0.141872522	-0.002486362	0.018820198	-0.00922426	Fitch 1970, Huey and Pianka 1981, FitzSimons 1943, Branch 1998, Pianka 1986, Pianka and Vitt 2003, Rogner 1997b, Auerbach 1987, McBrayer 2004, Brown and Nagy 2007, Huey et al. 2001, Sinervo et al. 2010, Kohler 2005, Goldberg 2006, Huey and Pianka 2007, Curry-Lindahl 1979, Huey and Pianka 1977, Verwaijen and Van Damme 2007, Conradie 2012, Mesquita et al. 2016, Branch 2016, Butler 2005, Huey and Pi…
Pedioplanis namaquensis	38.5	56	0.615902868	NA	NA	NA	NA	38.5	36.4369304	44.94158366	9.000818415	-0.000870024	-0.16396386	-0.001334157	0.01896828	-0.008762574	Huey and Pianka 1981, FitzSimons 1943, Branch 1998, Pianka 1986, Pianka and Vitt 2003, Parker 1936, Rogner 1997b, Auerbach 1987, McBrayer 2004, Huey et al. 2001, Kohler 2005, Goldberg 2006, Huey and Pianka 2007, Curry-Lindahl 1979, Huey and Pianka 1977, Verwaijen and Van Damme 2007, Mesquita et al. 2016, Branch 2016, Butler 2005, Huey and Pianka 2017, Pianka et al. 2017,
Pedioplanis rubens	NA	50	0.470660483	NA	NA	NA	NA	36.50284642	35.3208249	44.30159506	9.277499934	-0.001504117	-0.117043252	-0.001546495	0.023717938	-0.007277644	Branch 1998, Kohler 2005
Pedioplanis undata	NA	62	0.746347876	NA	NA	NA	NA	36.60370154	35.2739632	44.31690077	8.671711289	-0.00094339	-0.173610879	-0.000899506	0.018597842	-0.007945902	Branch 1998, Meik et al. 2002, Haacke 2008, Kohler 2005, Butler 2005, Kirchhof et al. 2014
Philochortus neumanni	NA	82	1.104664678	NA	NA	NA	NA	35.55531928	34.42593107	43.6711273	7.661769367	-0.000290425	-0.12439294	0.002719456	0.016671527	-0.004062699	Arnold 1998, Schatti and Desvoignes 1999
Phoboscincus garnieri	NA	200	2.305025856	NA	NA	NA	NA	30.33766313	29.23274638	40.86335878	2.114648131	NA	NA	NA	NA	NA	Greer 2001, Bauer and Sadlier 2000, Whittaker et al. 2004
Phoenicolacerta troodica	33.5	70	0.901884316	NA	NA	NA	NA	33.5	33.71291076	43.25424403	6.840537035	-0.001029939	-0.09603541	-0.006084283	0.01686912	-0.011298256	Baier et al. 2009
Pholidobolus ulisesi	NA	57.5	0.632423223	NA	NA	NA	NA	NA	NA	NA	NA	-0.000814697	0.215416896	-0.022473878	0.000874716	-0.016326847	Venegas et al. 2016
Pholidobolus vertebralis	NA	68	0.87294443	NA	NA	NA	NA	NA	NA	NA	NA	-0.001764529	-0.025682528	-0.002379208	0.027203528	-0.008763597	Fitch 1970, Uzzell 1973, Kohler 2008, Castro-Herrera et al. 2007, Arteaga et al. 2013, Doan and Cusi 2014, Averill-Murray and Averill-Murray 2017, Ruz 2005
Pholidoscelis atratus	NA	150	2.020643816	NA	NA	NA	NA	NA	NA	NA	NA	NA	NA	NA	NA	NA	Henderson and Powell 2009, Bell and Daltry 2012, Donihue and Herrel 2017
Pholidoscelis auberi	NA	136	1.888306005	NA	NA	NA	NA	NA	NA	NA	NA	NA	NA	NA	NA	NA	Schwartz and Henderson 1991, Henderson and Powell 2009, Torres et al. 2014
Pholidoscelis chrysolaemus	37.5	160	2.107813146	NA	NA	NA	NA	NA	NA	NA	NA	NA	NA	NA	NA	NA	Perry and Garland 2002, Schwartz and Henderson 1991, Henderson and Powell 2009, Sinervo et al. 2010, Henderson et al. 1988, Sproston et al. 1999
Pholidoscelis cineraceus	NA	150	2.020643816	NA	NA	NA	NA	NA	NA	NA	NA	NA	NA	NA	NA	NA	IUCN, Schwartz and Henderson 1991, Breuil 2002, Henderson and Powell 2009
Pholidoscelis corvinus	NA	133	1.858178603	NA	NA	NA	NA	NA	NA	NA	NA	NA	NA	NA	NA	NA	Schwartz and Henderson 1991, Hodge et al. 2003, Malhotra and Thorpe 1999, Shew et al. 2002, Henderson and Powell 2009, Lazell 1964
Pholidoscelis dorsalis	NA	117	1.68505803	NA	NA	NA	NA	NA	NA	NA	NA	NA	NA	NA	NA	NA	Schwartz and Henderson 1991, Henderson and Powell 2009, Cooper et al. 2013
Pholidoscelis erythrocephalus	NA	140	1.927458191	NA	NA	NA	NA	NA	NA	NA	NA	NA	NA	NA	NA	NA	Schwartz and Henderson 1991, Powell et al. 2005, Kerr et al. 2005, Malhotra and Thorpe 1999, Kerr et al. 2006, Henderson and Powell 2009
Pholidoscelis exsul	39.5	201	2.415939739	NA	NA	NA	NA	NA	NA	NA	NA	NA	NA	NA	NA	NA	Perry and Garland 2002, Cox et al. 2003, Rodda et al. 2001, Schwartz and Henderson 1991, Rodriguez-Ramirez and Lewis 1991, Lewis et al. 2000, Lopez-Ortiz and Lewis 2002, Sinervo et al. 2010, Kohler 2005, Henderson and Powell 2009, Rivero 1998, Angeli et al. 2015, Heatwole and Torres 1967
Pholidoscelis fuscatus	36.1	250	2.710593427	NA	NA	NA	NA	NA	NA	NA	NA	NA	NA	NA	NA	NA	Schwartz and Henderson 1991, Dunham et al. 1988, Pregill 1984, Malhotra and Thorpe 1999, Somma and Brooks 1976, Malhotra and Thorpe 1995, Sinervo et al. 2010, Kohler 2005, Henderson and Powell 2009, Brooks 1968, Alexander 2007, Bullock and Evans 1990, Daniells et al. 2008, Mesquita et al. 2016
Pholidoscelis griswoldi	NA	200	2.409203287	NA	NA	NA	NA	NA	NA	NA	NA	NA	NA	NA	NA	NA	Schwartz and Henderson 1991, Kolbe et al. 2008, Pregill 1984, Daltry 2007, Malhotra and Thorpe 1999, Henderson and Powell 2009, Bell and Daltry 2012
Pholidoscelis lineolatus	NA	59	0.760349756	NA	NA	NA	NA	NA	NA	NA	NA	NA	NA	NA	NA	NA	Schwartz and Henderson 1991, Nelson et al. 2001, Henderson and Powell 2009
Pholidoscelis maynardi	NA	72	1.029304064	NA	NA	NA	NA	NA	NA	NA	NA	NA	NA	NA	NA	NA	Schwartz and Henderson 1991, Noble and Klingel 1932, Henderson and Powell 2009
Pholidoscelis plei	36.6	181	2.274380368	NA	NA	NA	NA	NA	NA	NA	NA	NA	NA	NA	NA	NA	Perry and Garland 2002, Powell et al. 2005, Hodge et al. 2003, Pregill 1984, Censky 1995, Breuil 2002, Kohler 2005, Henderson and Powell 2009
Pholidoscelis pluvianotatus	37.8	169	2.181727651	NA	NA	NA	NA	NA	NA	NA	NA	NA	NA	NA	NA	NA	Schwartz and Henderson 1991, Pregill 1984, Malhotra and Thorpe 1999, Henderson and Powell 2009, Sinervo et al. 2010, Henderson and Powell 2009, Hirth 1965
Pholidoscelis taeniurus	37.2	105	1.53889872	NA	NA	NA	NA	NA	NA	NA	NA	NA	NA	NA	NA	NA	Schwartz and Henderson 1991, Henderson and Powell 2009, Sinervo et al. 2010, Sproston et al. 1999
Pholidoscelis wetmorei	NA	52.4	0.600120303	NA	NA	NA	NA	NA	NA	NA	NA	NA	NA	NA	NA	NA	Cox et al. 2003, Vitt and de Carvalho 1992, Schwartz and Henderson 1991, Rodriguez-Ramirez and Lewis 1991, Kohler 2005, Henderson and Powell 2009, Rivero 1998, Heatwole and Torres 1967
Phrynocephalus ahvazicus	NA	51	0.616005397	NA	NA	NA	NA	37.05792869	37.78854594	44.48971765	11.7100856	-0.000361246	-0.114895134	-0.000305947	0.015991064	-0.006837928	Melnikov et al. 2014
Phrynocephalus ananjevae	NA	50	0.589301863	NA	NA	NA	NA	37.0481597	37.79308504	44.48823511	11.76876329	-0.000476588	-0.129196435	-0.001527304	0.015513975	-0.00831719	Melnikov et al. 2013
Phrynocephalus arabicus	39.3	60	0.835159632	NA	NA	NA	NA	39.3	39.01994375	45.20463351	11.27575195	-0.000215404	-0.161531571	0.001739651	0.016081559	-0.006350994	Anderson 1999, Disi et al. 2001, Haas and Battersby 1959, Arnold 1984, Arnold 1980, Schatti and Desvoignes 1999, Jongbloed 2000, Hornby 1996, Zari 1996, Arnold 1994, van der Kooij 2001, Al-Sadoon and Abdo 1994, Gardner 2013, Melnikov et al. 2014
Phrynocephalus axillaris	NA	63.5	0.911612417	NA	NA	NA	NA	37.16607104	37.73829828	44.50612926	11.06052606	-0.000746782	-0.123554147	-0.003673716	0.018256483	-0.011489125	Perry and Garland 2002, Uetz 2006, Sun et al. 2012, Wang et al. 2013
Phrynocephalus clarkorum	NA	45	0.447224855	NA	NA	NA	NA	36.99618346	37.81723547	44.48034723	12.08095978	-0.000336609	-0.106449965	-0.000706195	0.013087021	-0.006598989	Anderson 1999, Khan 2006, Clark 1990, Khan 2015
Phrynocephalus erythrurus	NA	56.3	0.749328566	NA	NA	NA	NA	32.42073943	35.01605568	42.97389543	11.31475153	-0.00059787	0.080740447	-0.009699343	0.009059023	-0.014060101	Jin et al. 2013, Jin and Liao 2015
Phrynocephalus forsythii	NA	60.7	0.850800886	NA	NA	NA	NA	37.14382426	37.7486351	44.5027531	11.19415182	-0.000867185	-0.096343659	-0.004406335	0.019226111	-0.013515745	Uetz 2006, Zhang et al. 2010, Sun et al. 2012
Phrynocephalus frontalis	NA	59.4	0.821606912	NA	NA	NA	NA	NA	NA	NA	NA	-0.001202744	-0.092933351	-0.005201694	0.01977295	-0.012520125	Zhao and Liu 2013, Li et al. 2013, Zeng et al. 2016, Ji et al. 2017
Phrynocephalus golubewii	NA	70	1.043029414	NA	NA	NA	NA	37.21414751	37.71595985	44.51342532	10.77175361	-0.000586929	-0.107591503	-0.005374783	0.015891535	-0.011607417	Georgy Shenbrot pers. com. Sept. 6 2013, Everything for P. maculatus in Szczerbak 2003 may actually be this species
Phrynocephalus guttatus	NA	65	0.943095972	NA	NA	NA	NA	37.67882555	38.02708364	44.67080975	11.00229527	-0.000645293	-0.088939729	-0.005690396	0.018381304	-0.013635069	Szczerbak 2003, Manthey and Schuster 1996, Shenbrot and Semenov 1986, Rogovin and Semenov 2004, Kohler 2005, Liu et al. 2012, Rogovin and Semenov 2002, Smirina and Ananjeva 2017, Tabachishin and Zavialov 2005
Phrynocephalus helioscopus	41	70	1.043029414	NA	NA	NA	NA	41	39.93758268	45.74405852	10.85446217	-0.000670509	-0.018105603	-0.009528999	0.013134587	-0.014646162	Tinkle et al. 1970, Szczerbak 2003, Anderson 1999, Baran and Atatur 1998, Rogner 1997a, Terbish et al. 2006, Shenbrot and Semenov 1986, Turner 1977, Sinervo et al. 2010, Kohler 2005, Clemann et al. 2008, Nikolskii 1915, Wang et al. 2013, Shenbrot et al. 1991, Hallmann and Griebeler 2015, Smirina and Ananjeva 2017, Martin et al. 2017
Phrynocephalus interscapularis	41	47	0.505863849	NA	NA	NA	NA	41	40.14420844	45.77811439	12.03910962	-0.000443005	-0.099549878	-0.005047654	0.016127754	-0.011894377	Shine and Greer 1991, Szczerbak 2003, Anderson 1999, Perry and Garland 2002, Nikolsky 1915, Shenbrot and Semenov 1986, Ulmasov et al. 1999, Sinervo et al. 2010, Ulmasov et al. 1999, Clemann et al. 2008, Nikolskii 1915, Shenbrot et al. 1991, Smirina and Ananjeva 2017, Martin et al. 2017
Phrynocephalus lutensis	NA	75	1.136065223	NA	NA	NA	NA	NA	NA	NA	NA	-0.000266825	-0.144529869	-0.000273351	0.015595319	-0.007845862	Kamali and Anderson 2015
Phrynocephalus luteoguttatus	NA	47	0.505863849	NA	NA	NA	NA	37.01763545	37.80726794	44.48360277	11.95210791	-0.000336609	-0.106449965	-0.000706195	0.013087021	-0.006598989	Fitch 1970, Anderson 1999, Minton 1966, Khan 2006, Clark 1990, Khan 2015
Phrynocephalus maculatus	38.8	91	1.396823523	NA	NA	NA	NA	38.8	38.51048331	45.00649393	10.02615332	-0.00022742	-0.146828609	0.001505302	0.015963918	-0.006274498	Smith 1935, Szczerbak 2003, Anderson 1999, Minton 1966, Perry and Garland 2002, Leviton et al. 1992, Greene 1982, Arnold 1984, Arnold 1980, Schatti and Desvoignes 1999, Khan 2006, Clark 1990, Jongbloed 2000, Hornby 1996, Abu Baker et al. 2005, Scholz et al. 2013, Gardner 2013, Zoffer 1996, Hojati et al. 2014, Al-Barazengy 2015, Mohammed et al. 2015, Khan 2015
Phrynocephalus mystaceus	32.3	122.7	1.799862367	NA	NA	NA	NA	32.3	34.54110543	42.86804474	8.995300717	-0.000510451	-0.107969756	-0.004991818	0.01793018	-0.01273264	Szczerbak 2003, Nikolsky 1915, Manthey and Schuster 1996, Clark 1990, Shenbrot and Semenov 1986, Sinervo et al. 2010, Kohler 2005, Clemann et al. 2008, Szczerbak 1994, Nikolskii 1915, Shenbrot et al. 1991, Martin et al. 2017, Solovyeva et al. 2018b
Phrynocephalus ornatus	NA	47	0.505863849	NA	NA	NA	NA	37.01763545	37.80726794	44.48360277	11.95210791	-0.000346681	-0.120654229	-0.001798188	0.013819585	-0.008127044	Anderson 1999, Minton 1966, Khan 2006, Clark 1990, Leviton 1959, Khan 2015
Phrynocephalus persicus	38	59	0.812495496	NA	NA	NA	NA	38	38.26579268	44.78349102	11.29733393	-0.000746385	-0.106270205	-0.003832318	0.016720097	-0.009983324	Anderson 1999, Ahmadzadeh et al. 2008, Tadevosyan 2007, Cicek et al. 2011, Arakelyan et al. 2011, Cicek et al. 2012, Smirina and Ananjeva 2017, Ergul et al. 2017
Phrynocephalus przewalskii	38.1	90	1.381922992	NA	NA	NA	NA	38.1	38.1054393	44.77989588	10.04372174	-0.000765287	0.063610607	-0.010983416	0.010382361	-0.014137589	Perry and Garland 2002, Uetz 2006, Schmidt 1927b, Song 1987, Zhao et al. 2011, Wang et al. 2011, Xu and Yang 1995, Lian et al. 2012, Tang et al. 2012, Qu et al. 2011, Wang et al. 2013, Zhao and Liu 2013, Li et al. 2013, Qu et al. 2011, Zeng et al. 2016, Wang et al. 2017, Li et al. 2017
Phrynocephalus putjatai	NA	84	1.288887183	NA	NA	NA	NA	37.30409001	37.67416863	44.52707493	10.23151184	-0.000879928	0.082343351	-0.01065241	0.009350551	-0.01400067	Yuezhao Wang, personal communication to Shai Meiri, 22.07.2008, Jin et al. 2013, Jin et al. 2016, Wang et al. 2017
Phrynocephalus raddei	44	58	0.78944392	NA	NA	NA	NA	44	41.79559374	46.7353188	11.47925161	-0.000492776	-0.087834018	-0.005088788	0.015483767	-0.010658629	Szczerbak 2003, Anderson 1999, Perry and Garland 2002, Clark 1990, Khosravani et al. 2014
Phrynocephalus reticulatus	NA	55	0.717826151	NA	NA	NA	NA	42.47267063	40.92687119	46.24338402	11.60382793	-0.000367315	-0.102747835	-0.004826427	0.014925504	-0.011231066	Tikader and Sharma 1992, Shenbrot and Semenov 1986, Shenbrot et al. 1991
Phrynocephalus rossikowi	NA	50	0.589301863	NA	NA	NA	NA	37.0481597	37.79308504	44.48823511	11.76876329	-0.000447079	-0.104256095	-0.004952989	0.015424116	-0.011487556	Szczerbak 2003, Golubev et al. 1994
Phrynocephalus sakoi	NA	60	0.835159632	NA	NA	NA	NA	NA	NA	NA	NA	-0.000330038	-0.196507514	0.003616457	0.019922449	-0.006423257	Melnikov et al. 2015
Phrynocephalus scutellatus	NA	56	0.742123824	NA	NA	NA	NA	37.10406678	37.76710817	44.49671953	11.4329561	-0.000313532	-0.134180406	-0.000138788	0.01502029	-0.007022607	Smith 1935, Anderson 1999, Minton 1966, Khan 2006, Clark 1990, Leviton 1959, Khan 2015
Phrynocephalus strauchi	NA	52	0.642190382	NA	NA	NA	NA	37.06750798	37.78409498	44.49117139	11.65254737	-0.000870217	-0.082047671	-0.005624557	0.016186865	-0.012174405	Szczerbak 2003, Smirina and Ananjeva 2017
Phrynocephalus theobaldi	32	63.4	0.909487146	NA	NA	NA	NA	32	34.70754988	42.8269755	10.95235122	-0.000391244	0.233863903	-0.016213971	0.003482596	-0.015267526	Smith 1935, Schleich and Kastle 2002, Daniel 1983, Tikader and Sharma 1992, Shrestha 2001, Das 2002, Jin and Liao 2015, Nanhoe and Ouboter 1987, Kastle et al. 2013
Phrynocephalus versicolor	NA	67	0.983962262	NA	NA	NA	NA	37.80961144	38.08811213	44.71073226	10.91502733	-0.000745025	-0.019039128	-0.00784113	0.0134756	-0.013077912	Szczerbak 2003, Perry and Garland 2002, Rogner 1997a, Rogovin et al. 2000, Terbish et al. 2006, Shenbrot and Semenov 1986, Kohler 2005, Tang et al. 2012, Wang et al. 2013, Qu et al. 2011, Smirina and Ananjeva 2017
Phrynocephalus vlangalii	32	83	1.272737477	NA	NA	NA	NA	32	34.56782224	42.80394572	10.15125077	-0.000663909	0.063805145	-0.010452464	0.009887061	-0.013534365	Uetz 2006, Jin and Liu 2007, Ji et al. 2009, Zhao et al. 2011, Jin et al. 2013, Wang et al. 2013, Li et al. 2014, Qi et al. 2014, Zhao et al. 2016, Wu et al. 2018
Phrynosoma asio	32.4	124.5	1.753768354	NA	NA	NA	NA	32.4	35.27345495	43.93612075	8.635934672	-0.001329721	0.063478057	-0.011218885	0.014103056	-0.011459275	Tinkle et al. 1970, Dunham and Miles 1985, Fitch 1970, Pianka and Parker 1975, Sherbrooke 2003, Kohler 2003, Rogner 1997a, Lemos-Espinal et al. 2004, Duellman 1961, Vitt and Price 1982, Bergmann et al. 2009, Davis and Dixon 1961, Kohler 2005, Duellman 1965, Lemos-Espinal et al. 1997, Woolrich-Pina et al. 2012, Ramirez Bautista and Arizmendi 2004, Recchio et al. 2014, Pareja et al. 2016, Pareja et…
Phrynosoma bauri	NA	86	1.323652354	35	43.5	2.7	NA	NA	NA	NA	NA	-0.00073231	-0.047442627	-0.006565365	0.017641867	-0.014273908	Montanucci 2015
Phrynosoma blainvillii	34.9	114	1.651334287	46.7	46.7	NA	NA	34.9	46.7	46.7	7.656297694	-0.00070602	-0.117649973	-0.002564731	0.018284687	-0.00963262	Van Denburgh 1922, Jones and Lovich 2009, Cowles and Bogert 1944, Gerson 2011, Goldberg 2011, Stebbins and McGinnis 2012, Woolrich-Pina et al. 2012, Shaw 1952, Hult and Germano 2015
Phrynosoma braconnieri	32.7	79	1.224947723	NA	NA	NA	NA	32.7	36.13113753	44.06638073	9.721248903	-0.000969506	0.099148063	-0.015053792	0.005949384	-0.013197224	Pianka and Parker 1975, Sherbrooke 2003, Zamudio and Parra-Olea 2000, Vitt and Price 1982, Woolrich-Pina et al. 2012, Ramirez Bautista et al. 2004, Zuniga-Vega et al. 2016, Feria-Ortiz et al. 2018
Phrynosoma brevirostris	NA	85	1.310054464	NA	NA	NA	NA	NA	NA	NA	NA	-0.000727738	0.004740447	-0.008684887	0.013093054	-0.014927377	Montanucci 2015
Phrynosoma cornutum	38.5	130	1.804026354	38.5	47.9	9.5	74.8	38.5	38.5	47.9	9.5	-0.000991663	-0.07091291	-0.004619454	0.021903601	-0.011845755	Fitch 1970, 1985, Vitt et al. 1978, Perry and Garland 2002, Stebbins 2003, Grismer 2002, Pianka and Parker 1975, Sherbrooke 2003, Degenhardt et al. 1996, Pianka and Vitt 2003, Smith 1946, Rogner 1997a, Van Denburgh 1922, Lemos-Espinal et al. 2004, Dunham et al. 1988, Andrews and Pough 1980, Clusella-Trullas et al. 2008, Vitt and Price 1982, Warne and Charnov 2008, Bergmann et al. 2009, Lemos-Espi…
Phrynosoma coronatum	36.7	114	1.651334287	NA	NA	NA	NA	36.7	44.31195878	46.5880661	8.133463472	-0.000712281	-0.165234394	-0.00071384	0.019628107	-0.008065065	Fitch 1970, Melville et al. 2006, Conant and Collins 1998, Stebbins 2003, Pianka and Parker 1975, Sherbrooke 2003, Smith 1946, Linsdale 1932, Rogner 1997a, Van Denburgh 1922, Vitt and Price 1982, Sinervo et al. 2010, Kohler 2005, Goldberg 1983, Case 1975, Cunningham 1966, Brattstrom 1965, Goldberg 2011, Woolrich-Pina et al. 2012, Lemm 2006, Olberding et al. 2016
Phrynosoma diminutum	NA	67	1.033402247	NA	NA	NA	NA	NA	NA	NA	NA	-0.000514204	0.168604435	-0.013806638	0.003182162	-0.014304356	Montanucci 2015
Phrynosoma douglasii	35.5	80	1.239571895	NA	NA	NA	NA	35.5	37.76861477	44.97562452	9.750168122	-0.000769693	-0.001588248	-0.00789107	0.013171029	-0.014150556	Fitch 1970, 1985, Perry and Garland 2002, Conant and Collins 1998, Stebbins 2003, Pianka and Parker 1975, Sherbrooke 2003, Degenhardt et al. 1996, Smith 1946, Rogner 1997a, Van Denburgh 1922, Zamudio and Parra-Olea 2000, Dunham et al. 1988, Andrews and Pough 1980, Vitt and Price 1982, Warne and Charnov 2008, Bergmann et al. 2009, Ibarguengoytia and Casalins 2007, Sinervo et al. 2010, Jones and Lo…
Phrynosoma goodei	38.1	90	1.376507198	36	45.5	NA	NA	38.1	36	45.5	10.19018709	-0.000637321	-0.121150835	-0.001022612	0.018429706	-0.008252719	Jones and Lovich 2009, Lara-Resendiz et al. 2014, Rorabaugh and Lemos-Espinal 2016
Phrynosoma hernandesi	41	125	1.758428105	NA	NA	NA	NA	41	40.79655476	46.73056525	8.726056637	-0.00074987	0.024345822	-0.009649376	0.012415166	-0.015390422	Conant and Collins 1998, Stebbins 2003, Sherbrooke 2003, Smith 1946, Van Denburgh 1922, Zamudio and Parra-Olea 2000, Lemos-Espinal and Smith 2007b, Jones and Lovich 2009, Russell and Bauer 2000, Brennan and Holycross 2009, St. John 2002, Montanucci 1983, Goldberg 2014, Hibbitts and Hibbitts 2015, Lemos-Espinal et al. 2013, Young 2011, Olberding et al. 2016, Rorabaugh and Lemos-Espinal 2016, Sherb…
Phrynosoma mcallii	37.8	109.2	1.601322003	NA	NA	NA	NA	37.8	38.24710635	45.69245066	9.207073771	-0.000637321	-0.121150835	-0.001022612	0.018429706	-0.008252719	Fitch 1970, Stebbins 2003, Grismer 2002, Pianka and Parker 1975, Sherbrooke 2003, Smith 1946, Rogner 1997a, Van Denburgh 1922, Andrews and Pough 1980, Vitt and Price 1982, Bergmann et al. 2009, Wone and Beauchamp 2003, Funk 1981, Mcgrann et al. 2006, Grant 2005, Sinervo et al. 2010, Kohler 2005, Jones and Lovich 2009, Curry-Lindahl 1979, Goldberg 2011, Brennan and Holycross 2009, Stebbins and McG…
Phrynosoma orbiculare	37.9	97	1.463587933	NA	NA	NA	NA	37.9	39.09081853	45.74156861	9.308562639	-0.001437968	-0.042506093	-0.006196485	0.018625415	-0.012401962	Fitch 1970, Pianka and Parker 1975, Sherbrooke 2003, McCranie and Wilson 2001, Vitt and Price 1982, Bergmann et al. 2009, Davis and Smith 1953, Lemos-Espinal and Smith 2007b, Dixon and Lemos-Espinal 2010, Lemos-Espinal et al. 1997, Woolrich-Pina et al. 2012, Lemos-Espinal and Dixon 2013, Mendez de la Cruz et al. 2003, Goldberg 2011, Lemos-Espinal et al. 2013, Olberding et al. 2016, Ramirez-Bautis…
Phrynosoma ornatissimum	NA	110	1.609808218	NA	NA	NA	NA	NA	NA	NA	NA	-0.000816065	-0.125058126	-0.002567034	0.019890844	-0.01028775	Montanucci 2015
Phrynosoma platyrhinos	36.8	95	1.439366091	NA	NA	NA	75.85	36.8	36.07843977	45.17835151	9.857361192	-0.000725158	-0.063101257	-0.004957141	0.016132327	-0.011661117	Clobert et al. 1998, Dunham and Mills 1985, Fitch 1970, 1985, Huey and Pianka 1981, Melville et al. 2006, Perry and Garland 2002, Cox et al. 2003, Stebbins 2003, Grismer 2002, Pianka and Parker 1975, Pianka 1986, Sherbrooke 2003, Smith 1946, Greene 1982, Rogner 1997a, Van Denburgh 1922, Nagy et al. 1999, Dunham et al. 1988, Clusella-Trullas et al. 2008, Vitt and Price 1982, Warne and Charnov 2008…
Phrynosoma sherbrookei	30.3	62.4	0.950709147	NA	NA	NA	NA	30.3	34.82825234	43.3036207	10.27361354	-0.000969506	0.099148063	-0.015053792	0.005949384	-0.013197224	De Oca et al. 2014
Phrynosoma solare	34.7	117	1.681533552	NA	NA	NA	NA	34.7	38.2677235	44.95269555	8.640841582	-0.00100832	-0.099291108	-0.003339291	0.019039898	-0.010281891	Fitch 1970, Melville et al. 2006, Perry and Garland 2002, Stebbins 2003, Grismer 2002, Pianka and Parker 1975, Sherbrooke 2003, Degenhardt et al. 1996, Degenhardt et al. 1996, Smith 1946, Rogner 1997a, Van Denburgh 1922, Bogert and Oliver 1945, Vitt and Price 1982, Warne and Charnov 2008, Bergmann et al. 2009, Hardy and McDiarmid 1969, Sinervo et al. 2010, Kohler 2005, Jones and Lovich 2009, Bren…
Phrynosoma taurus	33.9	90	1.376507198	NA	NA	NA	NA	33.9	36.77702557	44.44684524	9.413220669	-0.000969506	0.099148063	-0.015053792	0.005949384	-0.013197224	Pianka and Parker 1975, Sherbrooke 2003, Zamudio and Parra-Olea 2000, Lemos-Espinal et al. 2004, Bergmann et al. 2009, Davis and Dixon 1961, Woolrich-Pina et al. 2012, Ramirez Bautista et al. 2004, Olberding et al. 2016
Pinoyscincus coxi	NA	90	1.185249063	NA	NA	NA	NA	24.93943305	26.61656878	37.34740309	6.018964384	NA	NA	NA	NA	NA	Brown and Alcala 1980, Alcala 1986, Smith 1993, Gaulke 2011
Pinoyscincus jagori	23.1	110.3	1.47047633	NA	37	NA	NA	23.1	25.51782427	37	5.537040988	NA	NA	NA	NA	NA	Brown and Alcala 1961, Brown and Alcala 1980, Sinervo et al. 2010, Kohler 2005, Alcala 1986, Auffenberg and Auffenberg 1989, Huang 2010, Auffenberg and Auffenberg 1988, Alcala and Brown 1966, Gaulke 2011
Plestiodon anthracinus	35	70	0.832821571	NA	NA	NA	NA	35	33.38271812	43.34745168	9.592907547	-0.001074528	0.090343273	-0.014261117	0.011637824	-0.015163649	Conant and Collins 1998, Smith 1946, Telford 1955, Clausen 1938, Lemay and Marsiglia 1952, Hotchkin et al. 2001, Walley 1998, Sinervo et al. 2010, Smith and Smith 1952, Youssef et al. 2008, Jensen et al. 2008, Beane et al. 2010, Gibbs et al. 2007, Brattstrom 1965, Hibbitts and Hibbitts 2015
Plestiodon barbouri	NA	70	0.832821571	NA	NA	NA	NA	30.9527873	29.52830806	41.66972583	9.875170173	NA	NA	NA	NA	NA	Goris and Maeda 2004
Plestiodon bilineatus	NA	71	0.852713208	NA	NA	NA	NA	29.841227	30.03372188	41.59454226	9.467386575	-0.001437968	-0.042506093	-0.006196485	0.018625415	-0.012401962	Feria-Ortiz et al. 2011, Banuelos-Alamillo et al. 2016
Plestiodon brevirostris	NA	71	0.852713208	NA	NA	NA	NA	30.01863506	30.13782889	41.65221071	9.471262364	-0.000969506	0.099148063	-0.015053792	0.005949384	-0.013197224	Fitch 1970, Duellman 1961, Guillette 1983, Axtel 1960, Lemos-Espinal and Smith 2007, Lemos-Espinal and Smith 2007b, Duellman 1965, Youssef et al. 2008, Lemos-Espinal and Dixon 2013, Goldberg 2014, Lemos-Espinal et al. 2013
Plestiodon chinensis	NA	134	1.743421394	NA	NA	NA	NA	30.93932715	30.57074664	42.00456607	7.465009424	-0.001624123	0.019025339	-0.009920868	0.019624533	-0.011749454	Smith 1935, Pope 1929, Karsen et al. 1986, Sinervo et al. 2010, Kohler 2005, Youssef et al. 2008, Das 2010, Zhang and Ji 2004, Hauschild and Gassner 1995, Lu et al. 2014, Shen et al. 2017
Plestiodon colimensis	NA	65	0.728897229	NA	NA	NA	NA	30.90238677	30.70406112	41.94733381	9.763629194	NA	NA	NA	NA	NA	Duellman 1961, Hardy and McDiarmid 1969, Duellman 1965
Plestiodon copei	28.7	76	0.948147089	NA	NA	NA	NA	28.7	29.32731484	41.21752337	9.231987702	-0.000969506	0.099148063	-0.015053792	0.005949384	-0.013197224	Dunham and Miles 1985, Cree 1994, Dunham et al. 1988, Duellman 1961, Radder et al. 2008, Guillette 1983, Cree and Guillette 1995, Garcia-Vazquez and Feria-Ortiz 2006, Davis and Smith 1953, Ramirez-Pinilla et al. 2009, Duellman 1965, Lemos-Espinal et al. 1997, Ramirez Bautista and Arizmendi 2004, Mesquita et al. 2016
Plestiodon dicei	NA	66	0.750307368	NA	NA	NA	NA	30.32469937	30.35682563	41.75819274	9.70379138	-0.000866497	-0.191379513	0.000960348	0.025447296	-0.009417318	Feria-Ortiz et al. 2011
Plestiodon elegans	33.4	105	1.401420247	28.6	41.9	9.3	NA	33.4	28.6	41.9	9.3	-0.001590774	0.019653223	-0.009869567	0.019597963	-0.011948279	Perry and Garland 2002, Goris and Maeda 2004, Dejun 1989, Pope 1929, Song 1987, Karsen et al. 1986, Du et al. 2000, Youssef et al. 2008, Sinervo et al. 2010, , Das 2010, Zhang ety al. 2006, Lazell 2004, Norval et al. 2012, Qing et al. 2015, Du and Ji 2001
Plestiodon gilberti	31.6	117	1.553172148	31.6	42.3	7.7	83.65	31.6	31.6	42.3	7.7	-0.000728842	-0.066498458	-0.004627949	0.01603011	-0.011629728	Stebbins 2003, Grismer 2002, Smith 1946, Clusella-Trullas et al. 2008, Jones 1985, Sinervo et al. 2010, Kohler 2005, Jones and Lovich 2009, Youssef et al. 2008, Brennan and Holycross 2009, Brattstrom 1965, Stebbins and McGinnis 2012, Lemm 2006, Aguirre and Gatica 2010, Punzo 1982
Plestiodon indubitus	NA	73	0.891669515	NA	NA	NA	NA	30.0328865	30.13120705	41.6543735	9.38566074	-0.001034268	0.054269615	-0.012180651	0.010151988	-0.013445682	Feria-Ortiz et al. 2011
Plestiodon kishinouyei	NA	172	2.093521355	NA	NA	NA	NA	31.06740472	30.5112362	42.02400304	6.695708446	NA	NA	NA	NA	NA	Goris and Maeda 2004, Diaz-Sacco 2015
Plestiodon kuchinoshimensis	NA	85.9	1.119863926	NA	NA	NA	NA	32.14248075	29.20619504	41.81386398	9.533290919	NA	NA	NA	NA	NA	Kurita and Hikida 2014
Plestiodon latiscutatus	29.8	96	1.275753811	NA	NA	NA	NA	29.8	28.68144869	41.26691803	8.873157178	NA	NA	NA	NA	NA	Fitch 1970, Szczerbak 2003, Goris and Maeda 2004, Sinervo et al. 2010, Brandley et al. 2014, Mesquita et al. 2016
Plestiodon leucostictus	NA	120.8	1.597994131	NA	NA	NA	NA	NA	NA	NA	NA	NA	NA	NA	NA	NA	Kurita et al. 2017
Plestiodon lynxe	NA	75	0.929572819	NA	NA	NA	NA	30.16995731	30.1970634	41.69652684	9.305064578	-0.001281814	0.004711959	-0.009148921	0.014400071	-0.012667049	Fitch 1970, Cox et al. 2003, Ramirez-Bautista et al. 1998, Boretto and Ibarguengoytia 2006, McCranie and Wilson 2001, Guillette 1983, Werler 1949, Werler 1951, Garcia-Vazquez and Feria-Ortiz 2006, Dixon and Lemos-Espinal 2010, Taylor 1935, Lemos-Espinal and Dixon 2013, Ramirez Bautista and Arizmendi 2004, Ramirez-Bautista et al. 2014
Plestiodon multilineatus	NA	70	0.832821571	NA	NA	NA	NA	30.94040556	30.68639592	41.95310351	9.535268419	-0.001296485	-0.10973074	-0.002826247	0.021393541	-0.010698766	Tanner 1957, Tanner 1988, Lemos-Espinal and Smith 2007b, Aguirre and Gatica 2010, Lemos-Espinal et al. 2013, Young 2011
Plestiodon parviauriculatus	NA	54	0.46889945	NA	NA	NA	NA	30.14124292	30.35741548	41.71639924	10.32039131	-0.001776905	-0.094403353	-0.00308546	0.022896238	-0.011109783	Lemos-Espinal and Smith 2007b, Aguirre and Gatica 2010, McDiarmid et al. 1976, Lemos-Espinal et al. 2013, Rorabaugh and Lemos-Espinal 2016
Plestiodon parvulus	NA	59	0.593081146	NA	NA	NA	NA	30.04685807	30.25426069	41.67784538	10.04446304	-0.00109903	0.009391168	-0.00930751	0.014354593	-0.013694141	Duellman 1961, Hardy and McDiarmid 1969, Garcia-Vazquez and Feria-Ortiz 2006, Duellman 1965
Plestiodon quadrilineatus	NA	80	1.020077568	NA	NA	NA	NA	30.89654559	30.66772385	41.96380479	9.100487205	-0.001568088	0.017590035	-0.010034628	0.020774715	-0.011942991	Taylor 1963, Karsen et al. 1986, Kohler 2005, Taylor and Elbel 1958, Das 2010, Hosono and Hikida 1999, Nguyen et al. 2011, Bain et al. 2007, Chan-ard et al. 2015, Bobrov 1993, Gawor et al. 2016
Plestiodon sumichrasti	NA	100	1.333	NA	NA	NA	NA	30.31754366	30.12848833	41.71892445	8.418583689	-0.001689936	0.027808051	-0.007383977	0.022256729	-0.009721326	Campbell 1999, Stafford and Meyer 2000, Lee 2000, Kohler 2003, McCranie and Castaneda 2005, Kohler 2008, Garcia-Vazquez and Feria-Ortiz 2006, Kohler 2005, Duellman 1963, Hernandez-Ordonez et al. 2015
Plestiodon tamdaoensis	NA	129	1.690094175	NA	NA	NA	NA	30.91981837	30.57981127	42.00160543	7.582189334	-0.001996455	0.00367565	-0.007361328	0.024504282	-0.009923277	Ziegler et al. 2006, Das 2010, Hecht et al. 2013
Plestiodon tetragrammus	28	76	0.948147089	NA	NA	NA	NA	28	29.51836457	41.13318726	9.15719529	-0.001140975	-0.060297593	-0.003684392	0.025830991	-0.010945419	Fitch 1970, Conant and Collins 1998, Degenhardt et al. 1996, Smith 1946, Werler 1951, Lemos-Espinal and Smith 2007, Garcia-Vazquez and Feria-Ortiz 2006, Lieb 1985, Lieb 1990, Lemos-Espinal and Smith 2007b, Jones and Lovich 2009, Dixon and Lemos-Espinal 2010, Brattstrom 1965, Lemos-Espinal and Dixon 2013, Hibbitts and Hibbitts 2015,
Podarcis bocagei	32.3	70	0.901884316	NA	45.4	NA	NA	32.3	34.7	45.4	8.049436827	-0.000753691	0.137446598	-0.018261687	0.005241266	-0.017734822	Clobert et al. 1998, Bauwens and Diaz-Uriarte 1997, Arnold and Ovenden 2004, Perry and Garland 2002, Arnold 1987, Rogner 1997b, Kaliontzopoulou et al. 2008, Perez-Mellado 1981, Galan 2008, Brana et al. 1992, Galan 1997, Kwet 2009, Malkmus 2004, Amat 2008, Kohler 2005, Siliceo and Diaz 2010, Bauwens 1999, Castilla and Bauwens 2000, Galan and Vicente 2003, Arnold 1987, Maso and Pijoan 2011, Galan 2…
Podarcis cretensis	33.2	71.5	0.929057129	NA	NA	NA	NA	33.2	33.10334613	43.19852062	6.724626326	-0.001652948	-0.040301219	-0.007633258	0.02061784	-0.011849102	Lymberakis et al. 2008, Speybroeck et al. 2016, Pafilis et al. 2017
Podarcis gaigeae	32.9	100	1.359	NA	NA	NA	NA	32.9	32.63034311	43.04243555	5.78289848	-0.001950022	-0.026951438	-0.008327579	0.020791745	-0.011853267	Arnold and Ovenden 2004, Valakos et al. 2008, Pafilis et al. 2008, Pafilis et al. 2009, Pafilis, personal communication, February 2009, Meiri, unpublished, Adamopoulo et al. 1999, Pafilis et al. 2011, Sagonas et al. 2013, Pafilis et al. 2013, Speybroeck et al. 2016, Pafilis et al. 2017
Podarcis lilfordi	36.2	81	1.088939291	NA	43.3	NA	NA	36.2	35.1	43.3	5.666095988	-0.000716896	0.154797651	-0.019443982	0.003643374	-0.018015177	Arnold and Ovenden 2004, Olesen and Valido 2003, Cooper and Vitt 2002, Rogner 1997b, Alvarez 2004, Nagy et al. 1999, Nyhagen et al. 2001, Sazima et al. 2005, Salvador 2008, Brown and Nagy 2007, Roca 1999, AL-Sadoon and Spellerberg 1985, Amat 2008, Kohler 2005, Siliceo and Diaz 2010, Castilla and Bauwens 2000, Salvador 2008, Brooke and Houston 1983, Maso and Pijoan 2011, Tenan et al. 2013, Ortega …
Podarcis melisellensis	35.8	74	0.973102805	NA	NA	NA	NA	35.8	33.9	43.8714301	6.754697117	-0.000903197	0.139750112	-0.018687765	0.005562246	-0.017340071	Bejakovic et al. 1995, Arnold and Ovenden 2004, Arnold 1987, Rogner 1997b, Sindaco et al. 2006, Corti and Cascio 2002, Verwaijen and Van Damme 2008, Kwet 2009, Amat 2008, Sinervo et al. 2010, Kohler 2005, Vervust 2011, Sindaco et al. 2010, Verwaijen and Van Damme 2007, Bejakovic et al. 1996, Speybroeck et al. 2016
Podarcis tauricus	34.2	91	1.238131149	NA	NA	NA	NA	34.2	33.43970549	43.47267791	6.077859481	-0.001172447	0.066695152	-0.013912829	0.011340374	-0.015075191	Clobert et al. 1998, Dunham and Miles 1985, Arnold and Ovenden 2004, Szczerbak 2003, Perry and Garland 2002, Baran and Atatur 1998, Arnold 1987, Vanhooydonck and Van Damme 1999, Street 1979, Rogner 1997b, Dunham et al. 1988, Valakos et al. 2008, Pafilis et al. 2009, Maragou et al. 1999, Kwet 2009, Amat 2008, Kohler 2005, Turner 1977, Arnold 1987, Stojanov et al. 2011, Valakos and Mylonas 1992, Ch…
Podarcis waglerianus	NA	76	1.007280911	NA	NA	NA	NA	34.6698614	33.94576851	43.94740896	6.523877365	NA	NA	NA	NA	NA	Arnold and Ovenden 2004, Rogner 1997b, Sindaco et al. 2006, Corti and Cascio 2002, Kwet 2009, Kohler 2005, Sindaco et al. 2010, Speybroeck et al. 2016, Kwet 2015
Pogona henrylawsoni	NA	152	2.088624341	NA	NA	NA	NA	35.73146954	34.5987402	44.4240067	4.009882059	-0.001117477	-0.142076506	0.001160608	0.025853415	-0.007353611	Cogger 2000, Wilson and Swan 2003, Manthey and Schuster 1996, Wilson and Swan 2008, Bartlett and Bartlett 2009, Swanson 2007, Turner and Valentic 1998, Chen et al. 2013, Brown 2012
Poromera fordii	NA	65	0.806907315	NA	NA	NA	NA	34.4452657	33.88906198	43.3291697	8.294182702	-0.002625369	0.003831102	-0.009378967	0.025665042	-0.008316897	Arnold 1998, Chirio and LeBreton 2007, Pauwels and Vande weghe 2008
Potamites juruazensis	26.4	58	0.644839235	NA	NA	NA	NA	26.4	28.84042727	40.35969917	9.8225599	-0.00263177	-0.003154813	-0.01020307	0.026309218	-0.007633573	Cox et al. 2003, Pianka and Vitt 2003, Avila-Pires and Vitt 1998, Huey et al. 2001, Sinervo et al. 2010, Vitt and Avila-Pires 1998, Mesquita et al. 2016, Ribeiro-Junior and Amaral 2017, Pianka et al. 2017,
Pristurus crucifer	NA	40	0.200118174	NA	NA	NA	NA	32.87615667	32.34558411	42.15559972	10.51151581	-0.000705674	-0.171429468	0.001266454	0.023584292	-0.006316688	Spawls et al. 2002, Schmidt 1953, Parker 1932, Loveridge 1947, Parker 1942, Schatti and Desvoignes 1999, Gans et al. 1965, Schatti 1989, Arnold 1993, Largen and Spawls 2010, Spawls et al. 2018
Pristurus mazbah	NA	39	0.167461883	NA	NA	NA	NA	31.37493122	31.47719302	41.66968018	10.55073804	-0.000290425	-0.12439294	0.002719456	0.016671527	-0.004062699	Al-Safadi 1989
Pristurus ornithocephalus	NA	60	0.723109214	NA	NA	NA	NA	32.4702599	31.90622142	41.99050127	9.349260872	-0.00036027	-0.142017637	0.002039696	0.01773761	-0.004660518	Schatti and Desvoignes 1999, Arnold 1986, Schatti 1989, Arnold 1993, Arnold 2009
Pristurus saada	NA	41	0.231968054	NA	NA	NA	NA	31.39852961	31.46622818	41.67326145	10.40899378	-0.00033431	-0.14816412	0.001837577	0.016743719	-0.005555798	Arnold 1986, Arnold 1993
Pristurus simonettai	NA	27	-0.30684962	NA	NA	NA	NA	31.16761777	31.53798522	41.63236162	11.59224006	-0.000950961	-0.153876936	0.002141953	0.026742193	-0.006183275	Arnold 1993
Pristurus somalicus	NA	39	0.167461883	NA	NA	NA	NA	32.86420997	32.35113507	42.1537867	10.58327393	-0.000460388	-0.188982	0.000390956	0.02042639	-0.006450101	Parker 1932, Arnold 1993, Largen and Spawls 2010
Proablepharus kinghorni	NA	47	0.274203983	NA	NA	NA	NA	30.74982716	30.08277352	41.96566775	5.650914866	-0.000679679	-0.166102081	-5.31E-05	0.020552262	-0.008458402	Cogger 2000, Wilson and Swan 2003, Greer 2005, Horner 1999, Swan et al. 2017
Proablepharus naranjicaudus	NA	48.5	0.318260074	NA	NA	NA	NA	30.76594427	30.07528481	41.96811367	5.554107104	-0.000781329	-0.153634415	0.000884434	0.021667924	-0.007374025	Greer 2005
Proablepharus reginae	NA	41	0.082679073	NA	NA	NA	NA	30.67976133	30.11532917	41.9550346	6.071766956	-0.000530858	-0.160011635	-0.000452714	0.018346739	-0.008510706	Cogger 2000, Wilson and Swan 2003, Greer 1989, Greer 2005, Horner 1999, Heatwole and Butler 1981
Proablepharus tenuis	NA	32	-0.26487072	NA	NA	NA	NA	30.55261668	30.17440613	41.93573921	6.835464259	-0.001003792	-0.163300088	0.001876789	0.025577422	-0.007293156	Cogger 2000, Wilson and Swan 2003, Greer 1989, Greer 2005, Horner 1999, Kohler 2005, Swanson 2007
Proctoporus chasqui	NA	74	0.994203139	NA	NA	NA	NA	24.04879021	27.32629874	39.57326304	9.000717834	-0.001585884	0.031783554	-0.011558045	0.015209194	-0.011379219	Chavez et al. 2011
Proctoporus oreades	NA	61	0.717159115	NA	NA	NA	NA	NA	NA	NA	NA	NA	NA	NA	NA	NA	Chavez et al. 2011
Proctoporus sucullucu	22.6	55.7	0.586813854	NA	NA	NA	NA	22.6	26.63282237	39.12814592	9.867509546	-0.001585884	0.031783554	-0.011558045	0.015209194	-0.011379219	Doan and Castoe 2003, Doan 2008
Proctoporus unsaacae	23.1	51.5	0.47438747	NA	NA	NA	NA	23.1	26.9694794	39.29780419	10.12637441	-0.001585884	0.031783554	-0.011558045	0.015209194	-0.011379219	Doan and Castoe 2003, Doan 2008
Psammodromus edwarsianus	NA	50	0.470660483	NA	45.5	8.8	NA	NA	NA	NA	NA	-0.001093594	0.070987432	-0.013943704	0.011753726	-0.016563478	Fitze et al. 2012
Psammodromus hispanicus	32.6	56	0.615902868	NA	NA	NA	NA	32.6	33.2566816	42.63739101	8.719336905	-0.000967776	0.035780107	-0.012741842	0.012925368	-0.015946209	Bauwens and Diaz-Uriarte 1997, Arnold and Ovenden 2004, Arnold 1987, Rogner 1997b, Verwaijen and Van Damme 2008, Kwet 2009, Malkmus 2004, Amat 2008, Kohler 2005, Siliceo and Diaz 2010, Carretero and Llorente 1993, Verwaijen and Van Damme 2007, Perez-Mellado et al. 1993, Kwet 2015
Psammodromus occidentalis	NA	44	0.306828848	NA	NA	NA	NA	32.96858827	33.59186564	42.77679975	9.40901114	-0.000915942	0.084918215	-0.015279761	0.009747689	-0.016776437	Fitze et al. 2012
Pseudemoia baudini	NA	53	0.442686783	NA	NA	NA	NA	32.11814633	31.10691253	42.2970508	3.992469306	-0.000873519	-0.202173477	-0.000645885	0.023321424	-0.012238785	Cogger 2000, Wilson and Swan 2003, Greer 1989, Greer 2005, Hutchinson and Donnellan 1992, Greer 1982
Pseudemoia cryodroma	NA	60	0.616650387	NA	NA	NA	NA	33.34608567	32.20237101	42.48329212	3.122760114	-0.000813832	0.121061076	-0.019207521	0.004523517	-0.01617696	Cogger 2000, Wilson and Swan 2003, Greer 2005, Wilson and Swan 2008, Hutchinson and Donnellan 1992
Pseudemoia entrecasteauxii	33.9	65	0.728897229	NA	42.1	2.5	NA	33.9	32.08825785	42.1	2.5	-0.000673191	0.152163903	-0.020902399	0.003782348	-0.01803411	Cogger 2000, Brown 1991, Wilson and Swan 2003, Greer 1989, Greer 2005, Huey and Bennett 1987, Melville and Swain 2000, Shine 1983, Vitt and Price 1982, Taylor 1985, Fischer and Lindenmayer 2005, Sinervo et al. 2010, Michael and Lindenmayer 2010, Heatwole and Taylor 1987, Hutchinson and Donnellan 1992, Greer 1982, Thompson et al. 1999, Bennett and John-Alder 1986, Murphy et al. 2006, Hutchinson et…
Pseudemoia pagenstecheri	NA	69	0.812643714	NA	NA	NA	NA	33.65676948	32.5	42.61723611	2.678456274	-0.000676352	0.054401755	-0.015429998	0.008772105	-0.016372837	Cogger 2000, Wilson and Swan 2003, Greer 2005, Thompson et al. 1999, Michael and Lindenmayer 2010, Hutchinson and Donnellan 1992, Swanson 2007, Thompson et al. 1999, Hutchinson et al. 2001, Wilson and Swan 2009, Swan et al. 2017
Pseudemoia rawlinsoni	NA	63	0.685070634	NA	NA	NA	NA	32.20681797	31.06571181	42.31050756	3.459861038	-0.000904095	0.035707002	-0.013156945	0.012051368	-0.014827713	Cogger 2000, Wilson and Swan 2003, Greer 2005, Taylor 1985, Michael and Lindenmayer 2010, Hutchinson et al. 2001, Swan et al. 2017
Pseuderemias mucronata	NA	52	0.520925867	NA	NA	NA	NA	35.25928773	34.47675374	43.61190755	8.942660611	-0.00054685	-0.141358392	0.000326631	0.018870345	-0.005805663	Flower 1933, Parker 1932, El Din 2006, Parker 1942, Le Berre 1989, Ineich 1999, Largen and Spawls 2010
Pseudocalotes viserion	NA	79	1.206132118	NA	NA	NA	NA	NA	NA	NA	NA	-0.002274443	-0.014574302	-0.004093168	0.028528876	-0.007273811	Grismer et al. 2016
Pseudogonatodes furvus	NA	45	0.352041166	NA	NA	NA	NA	28.96209742	29.92024647	40.80344557	10.09988161	NA	NA	NA	NA	NA	Uetz 2006, Rueda-Solano et al. 2014, Gamble et al. 2015
Pseudogonatodes gasconi	NA	24	-0.458772612	NA	NA	NA	NA	28.66547624	30.05806963	40.75843052	11.88154371	-0.00263177	-0.003154813	-0.01020307	0.026309218	-0.007633573	Avila-Pires and Hoogmoed 2000, Gamble et al. 2015
Pseudogonatodes guianensis	NA	30	-0.170949873	NA	NA	NA	NA	28.77077085	30.00914515	40.77440997	11.24908916	-0.002284294	0.002356007	-0.005394077	0.027609304	-0.007740916	Vitt et al. 2005, Duellman and Mendelson 1995, Avila-Pires 1995, Duellman 1978, Duellman 1990, Pianka and Vitt 2003, Dixon and Soini 1986, Hoogmoed 1973, Duellman 2005, Bartlett and Bartlett 2003, Vitt and Zani 1996b, Huey et al. 2001, Bartlett and Bartlett 2003, Kohler 2005, Avila-Pires et al. 2010, Daza et al. 2009, Gasc 1990, Whitworth and Beirne 2011, Torres-Carvajal and Salazar-Valenzuela 20…
Pseudogonatodes manessi	NA	38	0.133957282	NA	NA	NA	NA	28.88231548	29.95731665	40.79133791	10.57909373	NA	NA	NA	NA	NA	Avila-Pires and Hoogmoed 2000, Lotzkat 2007, Gamble et al. 2015
Pseudopus apodus	28.3	580	2.767833757	NA	NA	NA	NA	28.3	29.25458031	40.3493897	3.478157725	-0.001106649	-0.044345233	-0.007347489	0.016998399	-0.012043174	Fitch 1970, Amitai and Bouskila 2001, Szczerbak 2003, Anderson 1999, Disi et al. 2001, Baran and Atatur 1998, Leviton et al. 1992, Pianka and Vitt 2003, Flower 1933, Rogner 1997b, Reed and Marx 1959, Greene et al. 2006, Corti and Cascio 2002, Ahmadzadeh et al. 2008, Valakos et al. 2008, Valakos et al. 2004, Kwet 2009, Kohler 2005, De Magalhaes and Costa 2009, Arakelyan et al. 2011, Meek 1986, Bar…
Ptychoglossus brevifrontalis	NA	68	0.87294443	NA	NA	NA	NA	26.6005914	28.87039599	40.41044193	9.323886398	-0.002142518	0.002385117	-0.004963086	0.027194772	-0.00793131	Avila-Pires 1995, Duellman 1978, Duellman 1990, Dixon and Soini 1986, Hoogmoed 1973, Harris 1994, Duellman 2005, Kohler 2005, Avila-Pires et al. 2010, Peloso and Avila-Pires 2010, Torres-Carvajal and Salazar-Valenzuela 2013, Vitt et al. 2008, Ribeiro-Junior and Amaral 2017, Moraes et al. 2016
Ptychoglossus eurylepis	NA	41	0.147412295	NA	NA	NA	NA	28.0129328	29.97827219	40.91553727	10.95480641	-0.001764529	-0.025682528	-0.002379208	0.027203528	-0.008763597	Castro-Herrera, pers comm. (April 2017)
Ptychoglossus festae	NA	57	0.619898773	NA	NA	NA	NA	28.18578321	29.89795834	40.94176895	9.916576335	-0.001440667	-0.009214351	-0.004961733	0.022968085	-0.008801853	Kohler 2003, Harris 1994, Kohler 2008, Medina-Rangel and Lopez-Perilla 2014
Ptychoglossus gorgonae	NA	78	1.069696378	NA	NA	NA	NA	28.35033332	29.82150117	40.96674097	8.928202225	-0.00161255	-0.009353383	-0.004595534	0.024463522	-0.009768894	Harris 1994, Ortega-Andrade et al. 2010, Castro-Herrera et al. 2012
Ptychoglossus grandisquamatus	NA	46	0.31242636	NA	NA	NA	NA	28.42142095	30.15450797	41.0378591	10.5998139	-0.001440667	-0.009214351	-0.004961733	0.022968085	-0.008801853	Harris 1994, Castro-Herrera, pers comm. (April 2017)
Ptychoglossus myersi	NA	52	0.488243041	NA	NA	NA	NA	26.45985553	28.93578802	40.38908394	10.1692197	-0.001440667	-0.009214351	-0.004961733	0.022968085	-0.008801853	Kohler 2003, Harris 1994, Kohler 2008, Sanchez-Pacheco et al. 2016
Ptychoglossus plicatus	NA	66	0.830134075	NA	NA	NA	NA	28.2626939	29.86222227	40.95344086	9.454610493	-0.001440667	-0.009214351	-0.004961733	0.022968085	-0.008801853	Savage 2002, Harris 1994, Kohler 2008, Sanchez-Pacheco et al. 2016, Herrera and Fernandez-Marin 2016, Averill-Murray and Averill-Murray 2017
Ptychoglossus romaleos	NA	54	0.542364195	NA	NA	NA	NA	25.23506077	28.19623288	39.98751963	10.02310488	NA	NA	NA	NA	NA	Harris 1994
Pygmaeascincus koshlandae	NA	28	-0.452126717	NA	NA	NA	NA	30.14494647	30.21919345	40.97027464	7.24354432	-0.001117477	-0.142076506	0.001160608	0.025853415	-0.007353611	Cogger 2000, Pianka and Vitt 2003, Wilson and Swan 2003
Pygmaeascincus sadlieri	NA	30	-0.355375469	NA	NA	NA	NA	30.18034112	30.20274755	40.97564611	7.030945525	-0.001281711	-0.100504908	-0.003364984	0.022652817	-0.009781045	Cogger 2000, Pianka and Vitt 2003, Wilson and Swan 2003
Pygmaeascincus timlowi	NA	29	-0.402916865	NA	NA	NA	NA	30.16294898	30.2108287	40.97300669	7.135411811	-0.001281711	-0.100504908	-0.003364984	0.022652817	-0.009781045	Cogger 2000, Pianka and Vitt 2003, Wilson and Swan 2003, Ingram and Covacevich 1988, Wilson 2003, Greer 1991
Rhampholeon platyceps	NA	70	0.947862747	NA	NA	NA	NA	30.81894406	31.14919732	41.77774558	8.479193029	-0.002250343	-0.067217253	-0.00170054	0.030561211	-0.008277036	Menegon et al. 2002, Loveridge 1953, Necas 1999, Tilbury 2010, Branch and Ryan 2001
Rhampholeon uluguruensis	NA	50	0.556239612	NA	NA	NA	NA	30.675676	31.21576592	41.7560033	9.339736003	-0.00211422	-0.07658068	-0.000622788	0.03126381	-0.009093803	Spawls et al. 2002, Menegon et al. 2002, Tilbury and Emmrich 1996, Tilbury 2010, Branch 2014, Akani et al. 2001
Rhoptropus afer	32.7	55	0.563141386	NA	NA	NA	NA	32.7	31.98709608	42.40089198	9.995514991	-0.001283222	-0.179013653	-0.001649956	0.02153521	-0.010031736	Fitzsimons 1943, Branch 1998, Loveridge 1947, Brown and Nagy 2007, Sinervo et al. 2010, Werner and Whitaker 1978, Brain 1962, Schleicher 2015, Branch 2016
Riolama inopinata	NA	42.8	0.209027325	NA	NA	NA	NA	NA	NA	NA	NA	-0.002686027	-0.005714998	-0.00356604	0.030631827	-0.007207166	Kok et al. 2015
Ristella beddomii	NA	40	0.048051712	NA	NA	NA	NA	29.88847239	30.7219153	41.15940925	10.34203699	-0.001991628	-0.113443304	0.000235997	0.030854142	-0.0081023	Tikader and Sharma 1992, Das 2002, Srinivasulu et al. 2014
Ristella guentheri	NA	40	0.048051712	NA	NA	NA	NA	29.88847239	30.7219153	41.15940925	10.34203699	-0.001991628	-0.113443304	0.000235997	0.030854142	-0.0081023	Tikader and Sharma 1992, Srinivasulu et al. 2014
Ristella rurkii	NA	47	0.274203983	NA	NA	NA	NA	29.97120601	30.68347364	41.17196485	9.845095591	-0.001991628	-0.113443304	0.000235997	0.030854142	-0.0081023	Tikader and Sharma 1992, Srinivasulu et al. 2014
Ristella travancorica	NA	40	0.048051712	NA	NA	NA	NA	29.88847239	30.7219153	41.15940925	10.34203699	-0.001991628	-0.113443304	0.000235997	0.030854142	-0.0081023	Tikader and Sharma 1992, Inger et al. 1984, Das 2002, Srinivasulu et al. 2014
Rondonops biscutatus	NA	66	0.830134075	NA	NA	NA	NA	NA	NA	NA	NA	-0.002310247	0.008596382	-0.004965385	0.028410912	-0.008659969	Colli et al. 2015, Ribeiro-Junior and Amaral 2017, Abegg et al. 2017
Rondonops xanthomystax	NA	67	0.851698999	NA	NA	NA	NA	NA	NA	NA	NA	-0.002369369	0.00607695	-0.005633156	0.028269951	-0.00786364	Colli et al. 2015, Ribeiro-Junior and Amaral 2017
Saara asmussi	NA	269	2.858380829	NA	NA	NA	NA	40.2954393	36.46378321	44.72819357	4.924734835	-0.000266825	-0.144529869	-0.000273351	0.015595319	-0.007845862	Smith 1935, Anderson 1999, Khan 2006, Wilms 2005, Khan 2015
Saara hardwickii	NA	250	2.759603727	NA	NA	NA	NA	37.52520292	34.87614214	43.83396	5.082053988	-0.000458968	-0.093146839	0.002063156	0.016426576	-0.004375276	Fitch 1970, Minton 1966, Smith 1935, Zug et al. 2001, Daniel 1983, Tikader and Sharma 1992, Khan 2006, Manthey and Schuster 1996, Murthy 1995, Das 2002, Kohler 2005, Wilms 2005, Das et al. 2012, Das et al. 2015, Agarwal et al. 2015, Das and Das 2017
Saara loricata	43.2	290	2.959745783	NA	NA	NA	NA	43.2	38.12925335	45.66592668	4.764643068	-0.000361246	-0.114895134	-0.000305947	0.015991064	-0.006837928	Anderson 1999, Leviton et al. 1992, Anderson 1963, Wilms et al. 2009, Kohler 2005, Fathinia et al. 2009, Wilms 2005, Nazari-Serenjeh and Torki 2017
Salvator duseni	NA	410	3.378757794	NA	NA	NA	NA	34.12655305	32.32291389	42.69797239	3.96206496	-0.002503942	-0.093122342	-0.001367422	0.032437548	-0.008641142	Nogueira et al. 2005, Colli et al. 2002
Salvator merianae	35	501	3.649495327	NA	NA	NA	NA	35	32.73133035	42.96473143	3.384071193	-0.001918662	-0.015471733	-0.005652228	0.025298688	-0.009775841	Avila-Pires 1995, Pianka and Vitt 2003, Gainsbury and Colli 2003, Achaval and Olmos 2003, Manzani and Abe 2002, Bartlett and Bartlett 2003, Toledo et al. 2007, Colli et al. 2002, Rodrigues 2003, Vitt 1995, Brizuela and Albino 2004, Carreira et al. 2005, Sinervo et al. 2010, Kohler 2005, Van Wilgen and Richardson 2012, Linares and Eterovick 2013, Britto et al. 2001, Lanfri et al. 2013, Valdez et a…
Salvator rufescens	NA	614	3.924203634	NA	NA	NA	NA	34.32609429	32.23019831	42.72825464	2.763515788	-0.001606193	-0.068179142	-0.002834269	0.025571524	-0.009503548	Fitzgerald et al. 1991, Fitzgerald et al. 1993, Fitzgerald et al. 1999, Cox et al. 2003, Cooper and Vitt 2002, Pianka and Vitt 2003, Cei 1986, Cei 1993, Scolaro 2006, Brizuela and Albino 2004, Kohler 2005, Jansen and Kohler 2010, Montano et al. 2013, Lanfri et al. 2013, Truntau et al. 2016
Saproscincus basiliscus	NA	49.8	0.355353548	NA	35.5	NA	NA	25.58807413	25.76849602	35.5	4.293954732	-0.001281711	-0.100504908	-0.003364984	0.022652817	-0.009781045	Cogger 2000, Wilson and Swan 2003, Greer 1989, Greer 2005, Munoz et al. 2016
Saproscincus challengeri	NA	59	0.593081146	NA	NA	NA	NA	27.51350608	27.43714134	37.98353314	5.117540621	-0.001961615	-0.027931071	-0.00544203	0.023553329	-0.010903567	Cogger 2000, Wilson and Swan 2003, Greer 1989, Greer 2005, Wilson and Swan 2008, Swanson 2007, Swan et al. 2017
Saproscincus czechurai	NA	40	0.048051712	NA	NA	NA	NA	26.66952295	26.9305648	37.08713584	5.843259182	-0.001490403	-0.128712827	0.001586578	0.029374883	-0.007543047	Cogger 2000, Wilson and Swan 2003, Greer 1989, Greer 2005, Wilson and Swan 2008, Kutt et al. 2011, Munoz et al. 2016
Saproscincus eungellensis	NA	67	0.771395538	NA	NA	NA	NA	27.1714422	27.0282039	37.44614999	4.427529773	-0.001281711	-0.100504908	-0.003364984	0.022652817	-0.009781045	Sadlier et al. 2005, Wilson and Swan 2008
Saproscincus hannahae	NA	42.3	0.126453046	NA	NA	NA	NA	26.69820462	26.91723804	37.09148855	5.670982034	NA	NA	NA	NA	NA	Cogger 2000, Wilson and Swan 2003, Greer 2005, Wilson and Swan 2008
Saproscincus lewisi	NA	43	0.149469643	NA	NA	NA	NA	26.6390399	26.85049803	37.00195287	5.570926161	NA	NA	NA	NA	NA	Cogger 2000, Wilson and Swan 2003, Greer 2005
Saproscincus mustelinus	NA	64	0.707155136	NA	37.7	6.2	NA	27.092982	26.90263167	37.7	6.2	-0.000813832	0.121061076	-0.019207521	0.004523517	-0.01617696	Shine and Greer 1991, Cogger 2000, Shine and Greer 1991, Greer 1989, Greer 2005, James and Shine 1988, Kohler 2005, Swanson 2007, Downes and Shine 1999, Brown 2012, Swan et al. 2017
Saproscincus rosei	NA	65	0.728897229	NA	NA	NA	NA	27.56319187	27.41405515	37.99107343	4.819101726	-0.001961615	-0.027931071	-0.00544203	0.023553329	-0.010903567	Cogger 2000, Wilson and Swan 2003, Greer 2005, Wilson and Swan 2008, Swanson 2007, Swan et al. 2017
Saproscincus tetradactylus	NA	33	-0.454752055	NA	35.3	NA	NA	25.17634041	25.79894819	35.3	5.989595692	NA	NA	NA	NA	NA	Cogger 2000, Wilson and Swan 2003, Greer 1989, Greer 2005, Wilson and Swan 2008
Sarada darwini	NA	63.4	0.909487146	NA	NA	NA	NA	NA	NA	NA	NA	NA	NA	NA	NA	NA	Deepak et al. 2016
Sarada deccanensis	NA	78	1.188953741	NA	NA	NA	NA	NA	NA	NA	NA	-0.000993964	-0.18827035	0.002304823	0.026088773	-0.006605873	Amarasinghe et al. 2015, Deepak et al. 2016
Sarada superba	NA	75.7	1.148592706	NA	NA	NA	NA	NA	NA	NA	NA	NA	NA	NA	NA	NA	Deepak et al. 2016
Saurodactylus brosseti	NA	31	-0.128655769	NA	NA	NA	NA	NA	NA	NA	NA	-0.00072786	-0.185182423	-0.000459309	0.021089692	-0.010085297	Schleich at al. 1996
Saurodactylus mauritanicus	NA	34	-0.009507616	NA	NA	NA	NA	29.35801538	30.36169472	41.02527911	10.89695776	-0.00072786	-0.185182423	-0.000459309	0.021089692	-0.010085297	Schleich et al. 1996, Geniez et al. 2004, Loveridge 1947, Rogner 1997a, Le Berre 1989, Arnold 1993, Bons and Geniez 1996, Kohler 2005, Rosler 2005, Henkel and Schmidt 1995, Trape et al. 2012, Sanchez-Vialas et al. 2015, http://www.dwarfgeckos.com/other_dwarf/s_b/saurodactylus_brosseti.php
Sceloporus aeneus	34.5	62.8	0.958137966	NA	NA	NA	NA	34.5	35.5	42.71127854	7.978920512	-0.001034268	0.054269615	-0.012180651	0.010151988	-0.013445682	Fitch 1985, Cox et al. 2003, Fitch 1978, Benabib et al. 1997, Duellman 1961, Radder et al. 2008, Davis and Smith 1953, Sinervo et al. 2010, Kohler 2005, Duellman 1965, Andrews et al. 1999, Guillette 1982, Dixon and Lemos-Espinal 2010, Ramirez-Bautista et al. 2016, Ramirez-Bautista et al. 2016b, Ramirez-Bautista et al. 2014, Zuniga-Vega et al. 2016, Jimenez?Arcos et al. 2017, Ramirez-Bautista et a…
Sceloporus anahuacus	30.9	54	0.782618095	NA	NA	NA	NA	30.9	32.31063307	41.27989084	8.40049184	-0.000969506	0.099148063	-0.015053792	0.005949384	-0.013197224	Lara-Gongora 1983, Lara-Resendiz and Garcia-Vazquez 2013, Avila-Bocanegra et al. 2012
Sceloporus arenicolus	33.4	70	1.084327453	NA	43	9.1	NA	33.4	35.8	43	9.1	-0.000745375	-0.139957967	-0.002041182	0.022735044	-0.011386043	Conant and Collins 1998, Stebbins 2003, Degenhardt et al. 1996, Jones and Lovich 2009, Leavitt and Acre 2014, Hibbitts and Hibbitts 2015, Smolensky and Fitzgerald 2010, Jimenez?Arcos et al. 2017
Sceloporus aurantius	NA	55	0.80395092	NA	NA	NA	NA	34.08582963	34.1719432	42.31412749	8.423045137	-0.00109903	0.009391168	-0.00930751	0.014354593	-0.013694141	Grummer and Bryson 2014
Sceloporus bicanthalis	32.3	62	0.943232553	NA	NA	NA	NA	32.3	34.9	42.16015315	7.89597955	-0.000969506	0.099148063	-0.015053792	0.005949384	-0.013197224	Fitch 1985, Fitch 1978, Smith 1939, Benabib et al. 1997, Rodriguez-Romero et al. 2004, Mendez-de la Cruz et al. 1998, Sinervo et al. 2010, Andrews 1998, Andrews et al. 1999, Hernandez-Gallegos et al.2002, Guillette 1982, Rodriguez-Romero et al. 2011, Ramirez-Bautista et al. 2014, Zuniga-Vega et al. 2016, Jimenez-Arcos et al. 2017, Carbajal-Marquez and Quintero-Diaz 2017, Ramirez-Bautista et al. 2…
Sceloporus bimaculosus	35	140	1.890184752	NA	43	-3	NA	35	33	43	-3	-0.000841281	-0.15821882	-0.000803343	0.02266907	-0.009852534	Jones and Lovich 2009
Sceloporus brownorum	NA	61	0.924327968	NA	NA	NA	NA	NA	NA	NA	NA	-0.00109903	0.009391168	-0.00930751	0.014354593	-0.013694141	Carbajal-Marquez and Quintero-Diaz 2017, Smith et al. 1997, other sources may have been accidentally deleted
Sceloporus cautus	NA	89	1.363517048	NA	NA	NA	NA	35.41626915	34.78889285	41.29486044	10.80883446	-0.001031917	-0.094398099	-0.002990003	0.02286872	-0.010923125	Smith 1939, Lemos-Espinal and Smith 2007, Ferguson et al. 2006, Mendez-de la Cruz et al. 1998, Lemos-Espinal and Dixon 2013
Sceloporus chrysostictus	NA	62	0.943232553	NA	43.1	10.2	NA	35.27743247	34.7253748	43.1	10.2	-0.001689936	0.027808051	-0.007383977	0.022256729	-0.009721326	Fitch 1970, 1985, Fitch 1978, Campbell 1999, Stafford and Meyer 2000, Lee 2000, Kohler 2003, Smith 1939, Ramirez-Bautista and Olivera-Becerril 2004, Valdez-Gonzalez and Ramirez-Bautista 2002, Kohler 2008, Sinervo et al. 2010, Duellman 1965, Bustos-Zagal et al. 2011, Jimenez-Arcos et al. 2017
Sceloporus consobrinus	35.8	78.8	1.222000684	NA	40.4	11.4	NA	35.8	34.8	40.4	11.4	-0.000941978	-0.115398158	-0.002203331	0.023947033	-0.01059639	Smith 1946, Van Denburgh 1922, Warne and Charnov 2008, Vinegar 1975, Sinervo et al. 2010, Jones and Lovich 2009, Charnov et al. 2007, Bogert 1949, Vinegar 1975, Lemos-Espinal and Dixon 2013, Goldberg 2014, Young 2011, Jimenez-Arcos et al. 2017
Sceloporus cozumelae	NA	60	0.905110897	NA	NA	NA	NA	35.83924907	35.13123629	43.06489703	9.150700433	NA	NA	NA	NA	NA	Fitch 1970, 1978, 1985, Lee 2000, Kohler 2003, Smith 1939, Ramirez-Bautista and Olivera-Becerril 2004, Valdez-Gonzalez and Ramirez-Bautista 2002, Kohler 2008, Lopez and Gonzalez 1997, Sinervo et al. 2010, Duellman 1965, Bustos-Zagal et al. 2011, Hews 2012, Mendez de la Cruz et al. 2003, Jimenez-Arcos et al. 2017
Sceloporus dugesii	NA	88	1.350380113	NA	NA	NA	NA	32.72578524	32.29734769	41.63124701	7.273902705	-0.00109903	0.009391168	-0.00930751	0.014354593	-0.013694141	Duellman 1961, Mendez-de la Cruz et al. 1998, Mendez-de la Cruz et al. 1998, Sinervo et al. 2010, Duellman 1965, Dixon and Lemos-Espinal 2010, Ramirez-Bautista and Davila-Ulloa 2009, Lemos-Espinal and Dixon 2013, Zuniga-Vega et al. 2016, Jimenez-Arcos et al. 2017
Sceloporus edbelli	NA	77	1.195135671	NA	NA	NA	NA	34.22893731	34.10544912	42.33584543	7.563465458	-0.001153156	-0.136946998	-0.001564049	0.022744793	-0.010271617	Smith et al. 1995
Sceloporus exsul	NA	65	0.998169056	NA	NA	NA	NA	34.15688073	34.13892976	42.32491016	7.996275018	NA	NA	NA	NA	NA	Dixon et al. 1972, Ferguson et al. 2006, Mendez-de la Cruz et al. 1998, Dixon and Lemos-Espinal 2010, Flores-Villela and Rubio-Perez 2008
Sceloporus goldmani	NA	60	0.905110897	NA	NA	NA	NA	33.91438152	34.95755042	42.47212086	8.104741416	-0.000982764	-0.090994173	-0.004173581	0.019900944	-0.011555729	Benabib et al. 1997, Lemos-Espinal and Smith 2007, Sinervo et al. 2010, Lemos-Espinal and Dixon 2013, Carbajal-Marquez and Quintero-Diaz 2017
Sceloporus jalapae	NA	62	0.943232553	NA	NA	NA	NA	34.20470619	34.18812664	42.34393929	8.118475024	-0.000969506	0.099148063	-0.015053792	0.005949384	-0.013197224	Ramirez-Bautista et al. 2005, Smith 1939, Flores-Villela et al. 2007, Serrano-Cardozo et al. 2008, Bustos-Zagal et al. 2011, Jimenez-Arcos et al. 2017, Gonzalez-Espinoza et al. 2017
Sceloporus ochoterenae	34.1	62	0.943232553	NA	NA	NA	NA	34.1	34.12668271	42.30990339	8.116187534	-0.000969506	0.099148063	-0.015053792	0.005949384	-0.013197224	Smith et al. 2003, Smith 1939, Flores-Villela et al. 2007, Flores-Villela et al. 2007b, Davis and Dixon 1961, Davis and Smith 1953, Sinervo et al. 2010, Bustos-Zagal et al. 2011, Lemos-Espinal et al. 1997, Olberding et al. 2016, Jimenez-Arcos et al. 2017
Sceloporus palaciosi	30.2	68	1.050626359	NA	NA	NA	NA	30.2	31.61382407	40.49172456	7.415082562	-0.000969506	0.099148063	-0.015053792	0.005949384	-0.013197224	Lara-Gongora 1983, Mendez-de la Cruz et al. 1998, Sinervo et al. 2010, Lemos-Espinal et al. 2002, Guizado-Rodriguez et al. 2011
Sceloporus parvus	NA	51	0.716165361	NA	NA	NA	NA	34.45510508	34.42200935	42.51835963	8.972072296	-0.001031917	-0.094398099	-0.002990003	0.02286872	-0.010923125	Herrel et al. 2002, Smith 1939, Lemos-Espinal and Smith 2007, Mendez-de la Cruz et al. 1998, Dixon and Lemos-Espinal 2010, Lemos-Espinal and Dixon 2013, Garcia-Vazquez et al. 2014, Olberding et al. 2016, Ramirez-Bautista et al. 2014, Jimenez-Arcos et al. 2017
Sceloporus samcolemani	NA	61	0.924327968	NA	NA	NA	NA	33.92141173	34.95428388	42.47318776	8.062514301	-0.001031917	-0.094398099	-0.002990003	0.02286872	-0.010923125	Smith and Hall 1974, Lemos-Espinal and Smith 2007, Sinervo et al. 2010
Sceloporus scalaris	35.8	78	1.210137251	NA	NA	NA	NA	35.8	35.94674223	43.06572357	7.473240855	-0.00109903	0.009391168	-0.00930751	0.014354593	-0.013694141	Clobert et al. 1998, Dunham and Miles 1985, Fitch 1970, 1978, Vitt et al. 1978, Melville et al. 2006, Perry and Garland 2002, Barbault et al. 1985, Degenhardt et al. 1996, Smith 1939, Benabib et al. 1997, Benabib 1994, Van Denburgh 1922, Ramirez-Bautista and Olivera-Becerril 2004, Valdez-Gonzalez and Ramirez-Bautista 2002, McCranie and Wilson 2001, Dunham et al. 1988, Duellman 1961, Vitt and Pric…
Sceloporus siniferus	36.2	71.2	1.104088943	NA	NA	NA	NA	36.2	35.29713472	42.98233343	7.807318257	-0.001329721	0.063478057	-0.011218885	0.014103056	-0.011459275	Cox et al. 2003, Herrel et al. 2002, Ramirez-Bautista and Gutierrez-Mayen 2003, Fitch 1978, Kohler 2003, Smith 1939, Ramirez-Bautista and Olivera-Becerril 2004, Valdez-Gonzalez and Ramirez-Bautista 2002, Duellman 1961, Kohler 2008, Davis and Dixon 1961, Sinervo et al. 2010, Duellman 1965, Lemos-Espinal et al. 2001, Bustos-Zagal et al. 2011, Hierlihy et al. 2013, Ramirez-Bautista et al. 2015, Olbe…
Sceloporus slevini	32.6	70	1.084327453	NA	NA	NA	NA	32.6	34.11730465	42.03350443	7.680788098	-0.001776905	-0.094403353	-0.00308546	0.022896238	-0.011109783	Stebbins 2003, Smith 1946, Watkins-Colwell et al. 2003, Kohler 2005, Jones and Lovich 2009, Tanner 1987, Brennan and Holycross 2009, Lemos-Espinal et al. 2013, Rorabaugh and Lemos-Espinal 2016, Carbajal-Marquez and Quintero-Diaz 2017
Sceloporus subpictus	29.6	69	1.067599016	NA	NA	NA	NA	29.6	31.43814345	40.8392439	7.743603424	-0.000969506	0.099148063	-0.015053792	0.005949384	-0.013197224	Lynch and Smith 1965, Perez and de La Riva 2008, Flores-Villela et al. 2010, Flores-Villela and Rubio-Perez 2008, Jimenez-Arcos et al. 2017, Lopez?Alcaide et al. 2017
Sceloporus unicanthalis	NA	65	0.998169056	NA	NA	NA	NA	NA	NA	NA	NA	-0.00109903	0.009391168	-0.00930751	0.014354593	-0.013694141	NA
Sceloporus woodi	36.2	65	0.998169056	NA	44.2	NA	84.5	36.2	36.20308947	44.2	12.56819856	-0.001650686	0.019283552	-0.00555056	0.023851687	-0.010725311	Fitch 1985, Conant and Collins 1998, Fitch 1978, Smith 1946, McCoy et al. 2004, Greene 1982, Clusella-Trullas et al. 2008, Warne and Charnov 2008, Todd 2008, Lee and Funderburg 1977, Sinervo et al. 2010, Kohler 2005, Andrews 1998, Turner 1977, Curry-Lindahl 1979, Charnov et al. 2007, Bogert 1949, Jimenez-Arcos et al. 2017
Scincella apraefrontalis	NA	36.1	-0.095809245	NA	NA	NA	NA	27.85280143	29.08379926	39.07911679	9.390241113	-0.0016545	0.002087866	-0.008941132	0.022284376	-0.011739525	Nguyen et al. 2010
Scincella assatus	NA	55	0.494631124	NA	NA	NA	NA	28.06880309	28.98343545	39.11189707	8.092822078	-0.001329721	0.063478057	-0.011218885	0.014103056	-0.011459275	Fitch 1970, Kohler 2003, Kohler et al. 2006, Duellman 1961, Rand 1957, Kohler 2008, Garcia-Vazquez and Feria-Ortiz 2006, Davis and Dixon 1961, Duellman 1965, Leenders and Watkins-Colwell 2004, Mata-Silva et al. 2017
Scincella caudaequinae	NA	49	0.332643142	NA	NA	NA	NA	28.00954279	29.01097038	39.10290376	8.448770455	-0.000866497	-0.191379513	0.000960348	0.025447296	-0.009417318	Garcia-Vazquez and Feria-Ortiz 2006
Scincella cherriei	28	68	0.792171279	NA	NA	NA	NA	28	28.82860866	39.07066805	7.435133583	-0.001689936	0.027808051	-0.007383977	0.022256729	-0.009721326	Fitch 1970, 1973, 1985, Campbell 1999, Stafford and Meyer 2000, Savage 2002, Lee 2000, Kohler 2003, Duellman 1990, McCranie and Castaneda 2005, Mccranie et al. 2005, Guyer and Donnelly 2005, Cree 1994, Dunham et al. 1988, Fitch 1982, Vitt and Zani 1998, Kohler 2008, Fitch 1983, Garcia-Vazquez and Feria-Ortiz 2006, Watling et al. 2005, Kohler 2005, Duellman 1963, Duellman 1965, Goldberg 2009, Whit…
Scincella darevskii	NA	88.6	1.163263488	NA	NA	NA	NA	28.31340984	28.86978047	39.14901843	6.623585892	-0.001924269	0.013374388	-0.01038258	0.019863659	-0.009960025	Nguyen et al. 2010
Scincella doriae	NA	59	0.593081146	NA	NA	NA	NA	28.1048192	28.96670079	39.11736285	7.876490441	-0.001716123	0.014275814	-0.01058997	0.017532585	-0.010696547	Smith 1935, Taylor 1963, Ziegler et al. 2006, Ouboter 1986, Das 2010, Chan-ard et al. 2015,
Scincella gemmingeri	NA	65	0.728897229	NA	NA	NA	NA	28.154505	28.9436146	39.12490314	7.578051546	-0.001329721	0.063478057	-0.011218885	0.014103056	-0.011459275	Kohler 2003, Kohler 2008, Garcia-Vazquez and Feria-Ortiz 2006, Fernandez-Badillo et al. 2016, Ramirez-Bautista et al. 2014
Scincella incerta	NA	67	0.771395538	NA	NA	NA	NA	28.17005222	28.93639068	39.12726257	7.484666814	-0.001689936	0.027808051	-0.007383977	0.022256729	-0.009721326	Kohler 2003, Townsend and Wilson 2008
Scincella lateralis	29.2	59	0.593081146	NA	NA	NA	84.65	29.2	30	39.56631362	7.861797525	-0.001327795	0.031371197	-0.009306154	0.019189578	-0.012970591	Tinkle et al. 1970, Clobert et al. 1998, Dunham and Miles 1985, Fitch 1970, 1985, Perry and Garland 2002, Conant and Collins 1998, Pianka and Vitt 2003, Smith 1946, Cree 1994, Dunham et al. 1988, Andrews and Pough 1980, Clusella-Trullas et al. 2008, Warne and Charnov 2008, Radder et al. 2008, Milstead 1961, Werler 1951, Lemos-Espinal and Smith 2007, Sinervo et al. 2010, Kohler 2005, Fitch and Gre…
Scincella melanosticta	NA	65	0.728897229	NA	NA	NA	NA	28.154505	28.9436146	39.12490314	7.578051546	-0.002417641	-0.024557578	-0.003295308	0.029590923	-0.007453393	Taylor 1963, Manthey and Grossmann 1997, Grismer et al. 2007, Stuart and Emmett 2006, Ouboter 1986, Taylor and Elbel 1958, Das 2010, Teynie and David 2010, Hartmann et al. 2013, Goldberg 2013, Chan-ard et al. 2015
Scincella monticola	NA	59	0.593081146	NA	NA	NA	NA	28.1048192	28.96670079	39.11736285	7.876490441	-0.001513728	0.095309612	-0.013829949	0.012781147	-0.012700691	Song 1987, Truong et al. 2010, Inger et al. 1990, Pham et al. 2015
Scincella ochracea	NA	51	0.388744099	NA	NA	NA	NA	28.03006629	29.00143426	39.10601839	8.325495604	-0.001784546	0.009383804	-0.010102778	0.02017178	-0.01063523	Das 2010, Pham et al. 2015
Scincella potanini	NA	44.5	0.197554475	NA	NA	NA	NA	27.96012311	29.03393292	39.09540386	8.745610944	-0.001213929	0.152177769	-0.015868844	0.007890386	-0.014153557	Yuan et al. 2009
Scincella przewalskii	NA	43	0.149469643	NA	NA	NA	NA	27.94253216	29.04210644	39.09273427	8.851271363	-0.000847872	0.179699498	-0.015230296	0.005208176	-0.015019872	Yuezhao Wang pers. Comm. June 2013, Sept. 2017
Scincella punctatolineata	NA	40.2	0.055045925	NA	NA	NA	NA	27.907989	29.05815671	39.08749202	9.0587557	-0.002796325	-0.027649242	-0.003337968	0.031447283	-0.007213567	Taylor 1963, Ouboter 1986, Chan-ard et al. 2015
Scincella reevesii	NA	60	0.616650387	NA	NA	NA	NA	28.11344157	28.96269446	39.11867138	7.824699973	-0.002183535	-0.003751831	-0.006438998	0.025456459	-0.009151411	Schleich and Kastle 2002, Taylor 1963, Teynie 2004, Schmidt 1927, Ziegler 2002, Cox et al. 1998, Taylor 1962, Karsen et al. 1986, Inger and Colwell 1977, Lazell 2002, Webb et al. 1962, Ouboter 1986, Das 2002, Taylor and Elbel 1958, Das 2010, Cox et al. 2010, Teynie and David 2010, Yang et al. 2012, Ahmed 2009, Chan-ard et al. 2015, Bobrov 1993, IUCN Bangladesh 2015
Scincella rufocaudatus	NA	51	0.388744099	NA	NA	NA	NA	28.03006629	29.00143426	39.10601839	8.325495604	-0.00177487	0.012689158	-0.010984622	0.018367305	-0.010206141	Stuart et al. 2006, Darevsky and Van Sang 1983, Stuart and Emmett 2006, Das 2010, Teynie and David 2010, Luu et al. 2013, Vassilieva et al. 2016, Schmitz and Ziegler 2003
Scincella rupicola	NA	44	0.181708692	NA	NA	NA	NA	27.95432622	29.03662641	39.09452413	8.780430075	-0.001784546	0.009383804	-0.010102778	0.02017178	-0.01063523	Das 2010, Teynie and David 2010
Scincella vandenburghi	NA	53.6	0.458473106	NA	NA	NA	NA	28.05557535	28.98958164	39.10988963	8.172274811	-0.001816052	0.050574703	-0.011289175	0.017675092	-0.012154831	Goris and Maeda 2004, Chen 1996
Sigaloseps deplanchei	NA	46	0.244045038	NA	NA	NA	NA	29.58369152	29.58307454	40.74893652	6.643396304	NA	NA	NA	NA	NA	Bauer and DeVaney 1987, Bauer and Sadlier 2000, Bauer and Vindum 1990, Sadlier et al. 2014, Sadlier 1987, Sadlier and Bauer 1999
Silvascincus tryoni	NA	104	1.388000653	NA	NA	NA	NA	26.8318294	28.39879972	37.6053637	4.867885766	-0.001961615	-0.027931071	-0.00544203	0.023553329	-0.010903567	Cogger 2000, Wilson and Swan 2003, Fitch 1970, Greer 2005, Wilson and Swan 2008, Swan et al. 2017
Sitana attenboroughii	NA	55.8	0.737299188	NA	NA	NA	NA	NA	NA	NA	NA	NA	NA	NA	NA	NA	Sadasivan et al. 2018
Sitana bahiri	NA	50	0.589301863	NA	NA	NA	NA	NA	NA	NA	NA	NA	NA	NA	NA	NA	Amarasinghe et al. 2015, de Silva and Ukuwela 2017, Das and Das 2017
Sitana devakai	NA	45.6	0.465085836	NA	NA	NA	NA	NA	NA	NA	NA	NA	NA	NA	NA	NA	Amarasinghe et al. 2015, de Silva and Ukuwela 2017
Sitana fusca	NA	47.7	0.525799567	NA	NA	NA	NA	33.34006095	33.5963146	42.77890021	10.2113065	-0.002464231	-0.252835092	-0.000472382	0.031338598	-0.009590625	Schleich and Kastle 2002, Manthey 2010, Kastle et al. 2013, Schleich and Kastle 1998
Sitana marudhamneydhal	NA	55	0.717826151	NA	NA	NA	NA	NA	NA	NA	NA	NA	NA	NA	NA	NA	Deepak et al. 2016
Sitana ponticeriana	34.5	81	1.239845984	NA	NA	NA	NA	34.5	34.00232812	43.11068125	8.661912678	-0.001275959	-0.092606177	0.000612575	0.025077844	-0.006961248	Fitch 1970, Smith 1935, Daniel 1983, Tikader and Sharma 1992, Boulenger 1890, Erdelen 1998, Rao 1998, Deraniyagala 1953, Manthey and Schuster 1996, Shrestha 2001, Dunham et al. 1988, Radder et al. 2008, Somaweera and Somaweera 2009, Das 2002, Kohler 2005, Manthey 2010, Das and de Silva 2011, Radder and Shanbhag 2003, Subba Rao and Rajabai 1972, Turner 1977, Pal et al. 2010, Pal et al. 2011, Pal e…
Sitana schleichi	NA	39.5	0.271433982	NA	NA	NA	NA	31.16891263	32.42008036	42.08927102	10.72484356	-0.001052999	-0.118117936	0.004052063	0.027565795	-0.00456606	Schleich and Kastle 2002, Manthey 2010, Kastle et al. 2013
Sitana spinaecephalus	NA	56.6	0.756495019	NA	NA	NA	NA	NA	NA	NA	NA	-0.001256975	-0.175084399	0.002291793	0.026918792	-0.006927672	Deepak et al. 2016
Sitana visiri	NA	56.3	0.749328566	NA	NA	NA	NA	NA	NA	NA	NA	NA	NA	NA	NA	NA	Deepak et al. 2016
Smaug giganteus	NA	220	2.659955001	NA	NA	NA	NA	31.29482713	31.7859748	42.16803326	5.435100684	-0.0020668	-0.218662155	0.000246921	0.030359026	-0.009736884	Fitch 1970, Branch 1998, Costandius and Mouton 2006, Rogner 1997b, Loveridge 1944, Boretto and Ibarguengoytia 2006, Alexander and Marais 2007, Flemming 1993, Cree and Guillette 1995, Ibarguengoytia and Casalins 2007, Van Wyk 1991, Flemming and Mouton 2002, Mouton et al. 2010, Van Wyk 1994, Goldberg 2006, Ibarguengoytia and Cussac 1996, Carey and Judge 2000, Van Wilgen and Richardson 2012, Honegge…
Sphaerodactylus altavelensis	NA	29	-0.214677946	NA	NA	NA	NA	28.58677423	29.56228543	40.35749085	11.37417585	NA	NA	NA	NA	NA	Schwartz and Henderson 1991, Steinberg et al. 2007, Shreve 1968, Henderson and Powell 2009, Thomas and Schwartz 1983
Sphaerodactylus clenchi	NA	34	-0.009507616	NA	NA	NA	NA	28.66183199	29.52741032	40.36888157	10.92333965	NA	NA	NA	NA	NA	Schwartz and Henderson 1991, Steinberg et al. 2007, Shreve 1968, Henderson and Powell 2009
Sphaerodactylus darlingtoni	NA	29	-0.214677946	NA	NA	NA	NA	28.58677423	29.56228543	40.35749085	11.37417585	NA	NA	NA	NA	NA	Schwartz and Henderson 1991, Shreve 1968, Henderson and Powell 2009, Henkel and Schmidt 1995
Sphaerodactylus fantasticus	NA	29	-0.214677946	NA	NA	NA	NA	28.58677423	29.56228543	40.35749085	11.37417585	NA	NA	NA	NA	NA	Schwartz and Henderson 1991, Thomas 1964, Breuil 2002, Henderson and Powell 2009, Turk et al. 2010, Rosler 2005, Bentz et al. 2011, Alexander 2007, Daniells et al. 2010, Daniels et al. 2008
Sphaerodactylus gaigeae	27.8	25	-0.406118174	NA	38.2	12.5	NA	27.8	27.6	38.2	12.5	NA	NA	NA	NA	NA	Schwartz and Henderson 1991, Huey et al. 2009, Henderson and Powell 2009
Sphaerodactylus guanajae	NA	26.2	-0.345645165	NA	NA	NA	NA	28.5388623	29.58454741	40.35021976	11.66195997	NA	NA	NA	NA	NA	McCranie and Hedges 2012
Sphaerodactylus kirbyi	25.3	29	-0.214677946	NA	NA	NA	NA	25.3	27.63353288	39.28908855	11.30237053	NA	NA	NA	NA	NA	Daudin and de Silva 2007, Henderson and Powell 2009, Bentz et al. 2011, Quinn et al. 2010
Sphaerodactylus klauberi	24.2	37	0.09955912	NA	36.3	10.4	NA	24.2	25.1	36.3	10.4	NA	NA	NA	NA	NA	Schwartz and Henderson 1991, Steinberg et al. 2007, Heatwole and Veron 1977, Huey et al. 2009, Henderson and Powell 2009, Bentz et al. 2011, Rivero 1998
Sphaerodactylus leonardovaldesi	NA	29.1	-0.210237823	NA	NA	NA	NA	28.58839857	29.5615307	40.35773736	11.36441924	NA	NA	NA	NA	NA	McCranie and Hedges 2012
Sphaerodactylus levinsi	NA	29.7	-0.183913346	NA	NA	NA	NA	28.64569829	28.80530012	39.55044696	11.2610576	NA	NA	NA	NA	NA	Schwartz and Henderson 1991, Henderson and Powell 2009, Meier and Noble 1990
Sphaerodactylus macrolepis	29.3	35	0.027882092	NA	39.4	11.3	NA	29.3	27.6	39.4	11.3	NA	NA	NA	NA	NA	Rodda et al. 2001, Schwartz and Henderson 1991, Steinberg et al. 2007, Andrews and Pough 1980, Huey et al. 2009, Henderson and Powell 2009, Daza et al. 2009, Bentz et al. 2011, Rivero 1998, http://www.dwarfgeckos.com/sphaerodactylus/s_m/sphaerodactylus_macrolepis.php
Sphaerodactylus monensis	NA	30	-0.170949873	NA	NA	NA	NA	28.65044073	28.80309657	39.55116667	11.23257198	NA	NA	NA	NA	NA	Schwartz and Henderson 1991, Henderson and Powell 2009, Rivero 1998q
Sphaerodactylus notatus	NA	34	-0.009507616	NA	NA	NA	NA	28.66183199	29.52741032	40.36888157	10.92333965	-0.001568322	-0.009200336	-0.003783176	0.024905832	-0.00908776	Conant and Collins 1998, Smith 1946, Thomas et al. 1992, Collette 1962, Schwartz and Henderson 1991, Steinberg et al. 2007, Andrews and Pough 1980, Krysko et al. 2003, Henderson and Powell 2009, http://www.dwarfgeckos.com/sphaerodactylus/s_not/sphaerodactylus_notatus.php
Sphaerodactylus plummeri	NA	22	-0.571004638	NA	NA	NA	NA	28.45641872	29.6228543	40.33770818	12.15715929	NA	NA	NA	NA	NA	Thomas and Hedges 1992, Henderson and Powell 2009, Scantlebury et al. 2011
Sphaerodactylus richardsonii	NA	40	0.200118174	NA	NA	NA	NA	28.7385197	29.49177786	40.38051965	10.46271314	NA	NA	NA	NA	NA	Schwartz and Henderson 1991, Henderson and Powell 2009, Bauer and Russell 1992
Sphaerodactylus townsendi	31	30	-0.170949873	NA	42.1	11.4	NA	31	30.2	42.1	11.4	NA	NA	NA	NA	NA	Schwartz and Henderson 1991, Steinberg et al. 2007, Huey et al. 2009, Lopez-Ortiz and Lewis 2002, Henderson and Powell 2009, Daza et al. 2009, Rivero 1998, Regalado 2006
Sphenomorphus apalpebratus	NA	42	0.116471959	NA	NA	NA	NA	28.09155146	29.15344688	39.26004756	9.016814933	-0.001734308	0.008970166	-0.010975999	0.016381227	-0.010931904	Datta-Roy et al. 2013
Sphenomorphus bignelli	NA	35	-0.139204285	NA	NA	NA	NA	28.05128377	29.22688329	39.30104986	9.623316451	NA	NA	NA	NA	NA	Shine and Greer 1991, Greer 1977, McCoy 1980, McCoy 2006, McCoy 2015
Sphenomorphus buenloicus	NA	57	0.544719909	NA	NA	NA	NA	27.77874853	28.72140884	38.83688163	7.855901224	-0.00177487	0.012689158	-0.010984622	0.018367305	-0.010206141	Darevsky and Van Sang 1983, Das 2010, Jestrzemski et al. 2013, Vassilieva et al. 2016, Neang and Poyarkov 2016
Sphenomorphus cameronicus	NA	70	0.832821571	NA	NA	NA	NA	28.4068814	29.06165709	39.35501514	7.487410923	-0.002274443	-0.014574302	-0.004093168	0.028528876	-0.007273811	Grismer 2011, Law 2017
Sphenomorphus concinnatus	NA	70	0.832821571	NA	NA	NA	NA	28.4068814	29.06165709	39.35501514	7.487410923	NA	NA	NA	NA	NA	McCoy 1980, McCoy 2006, Greer and Parker 1967, Greer and Parker 1968, McCoy 2015
Sphenomorphus courcyanum	NA	44	0.181708692	NA	NA	NA	NA	28.16868383	29.17233409	39.31886642	8.918150227	-0.002216185	-0.007038376	-0.006618145	0.024431187	-0.008876023	Tikader and Sharma 1992
Sphenomorphus haasi	NA	57	0.544719909	NA	NA	NA	NA	28.30148475	29.11062898	39.33902021	8.120478376	-0.002514078	-0.000793217	-0.008297432	0.027001922	-0.007132104	Das 2004, Das 2010, Das 2011
Sphenomorphus indicus	NA	104.7	1.397407835	NA	37.6	3.1	NA	26.41310892	25.7	37.6	3.1	-0.002007184	0.001867746	-0.007470595	0.023329877	-0.010148468	Smith 1935, Fitch 1970, Schleich and Kastle 2002, Ji et al. 2006, Tikader and Sharma 1992, Taylor 1963, Dejun 1989, Teynie 2004, Pope 1929, Manthey and Grossmann 1997, Ziegler 2002, Cox et al. 1998, Song 1987, Karsen et al. 1986, Inger and Colwell 1977, Shrestha 2001, Grismer et al. 2007, Shine 1985, Das 2002, Sinervo et al. 2010, Taylor and Elbel 1958, Das 2010, Cree and Hare 2010, Cox et al. 20…
Sphenomorphus kinabaluensis	NA	59	0.593081146	NA	NA	NA	NA	28.31917682	29.10240847	39.34170515	8.014210593	-0.002491327	0.003281843	-0.002184307	0.031096793	-0.006216938	Inger and Lian 1996, Uetz 2001, Kohler 2005, Das 2010, Das 2011
Sphenomorphus lineopunctulatus	NA	84	1.088497815	NA	NA	NA	NA	28.50041582	29.01819691	39.36920986	6.925594282	-0.002443827	-0.023724279	-0.002613356	0.030355001	-0.007366215	Taylor 1963, Taylor 1962, Hartmann et al. 2010, Teynie and David 2010
Sphenomorphus maculatus	32.1	70	0.832821571	NA	NA	NA	NA	32.1	30.88540574	40.5938801	8.419880722	-0.002463929	-0.017713917	-0.004727835	0.028122113	-0.00798276	Smith 1935, Schleich and Kastle 2002, Taylor 1963, Stuart et al. 2006, Bauer and Gunther 1992, Cox et al. 1998, Inger and Colwell 1977, Pauwels et al. 2003, Shrestha 2001, Stuart and Emmett 2006, Mahony and Ali Reza 2008, Das 2002, Taylor and Elbel 1958, Das 2010, Cox et al. 2010, Ahmed et al. 2009, Huang 2010, Grismer 2011, Teynie and David 2010, Ahmed 2009, Galoyan and Geissler 2013, Goldberg 2…
Sphenomorphus mimicus	NA	42	0.116471959	NA	NA	NA	NA	28.14481818	29.18342311	39.31524459	9.061499809	-0.002443827	-0.023724279	-0.002613356	0.030355001	-0.007366215	Taylor 1963, Nguyen et al. 2011, Chan-ard et al. 2015
Sphenomorphus multisquamatus	NA	73	0.891669515	NA	NA	NA	NA	28.16473924	28.82176115	39.39153078	7.623565934	-0.002502703	0.001244313	-0.005240869	0.029049357	-0.006674521	Inger et al. 2001, Das 2004, Manthey and Grossmann 1997, Malkmus et al. 2002, Inger and Lian 1996, Das 2010, Das 2011, Goldberg 2015
Sphenomorphus murudensis	NA	50.4	0.372148202	NA	NA	NA	NA	28.2383526	29.13996294	39.32943931	8.499683168	-0.002491327	0.003281843	-0.002184307	0.031096793	-0.006216938	Das 2004, Das 2010, Das 2011, Smith 1925
Sphenomorphus necopinatus	NA	44	0.181708692	NA	NA	NA	NA	28.16868383	29.17233409	39.31886642	8.918150227	-0.002549427	-0.018924934	-0.002109674	0.031201066	-0.007361638	Brongersma 1942, Das 2010
Sphenomorphus praesignis	NA	121	1.600313961	NA	NA	NA	NA	29.71207669	29.90983057	40.63067177	6.535202059	-0.002274443	-0.014574302	-0.004093168	0.028528876	-0.007273811	Taylor 1963, Manthey and Grossmann 1997, Cox et al. 1998, Grismer 2007, Das 2010, Cox et al. 2010, Grismer 2011, Goldberg and Grismer 2014, Chan-ard et al. 2015, Dring 1979, Sumarli et al. 2015, Sumarli and Grismer 2016
Sphenomorphus puncticentralis	NA	45	0.213223207	NA	NA	NA	NA	28.18021283	29.16697721	39.32061606	8.848901014	-0.002549427	-0.018924934	-0.002109674	0.031201066	-0.007361638	Iskandar 1994, Das 2010
Sphenomorphus schlegeli	NA	33	-0.221718488	NA	NA	NA	NA	28.02109748	29.24090916	39.29646881	9.804631116	NA	NA	NA	NA	NA	Dunn 1927, Darevsky 1964, Auffenberg 1980
Sphenomorphus scutatus	NA	44	0.181708692	NA	NA	NA	NA	28.16868383	29.17233409	39.31886642	8.918150227	NA	NA	NA	NA	NA	Greer and Shea 2004, Crombie and Pregill 1999, Greer and Parker 1974, Zug 2013
Sphenomorphus shelfordi	NA	70	0.832821571	NA	NA	NA	NA	28.4068814	29.06165709	39.35501514	7.487410923	-0.002514078	-0.000793217	-0.008297432	0.027001922	-0.007132104	de Rooij 1915, Uetz 2006, Das 2010
Sphenomorphus tanahtinggi	NA	64	0.707155136	NA	NA	NA	NA	28.36090867	29.08301803	39.34803835	7.763547234	-0.002491327	0.003281843	-0.002184307	0.031096793	-0.006216938	Inger et al. 2001, Das 2010
Sphenomorphus tenuiculus	NA	60	0.616650387	NA	NA	NA	NA	28.32779919	29.09840214	39.34301367	7.962420125	NA	NA	NA	NA	NA	Uetz 2006, Das 2010
Sphenomorphus tersus	NA	96	1.275753811	NA	NA	NA	NA	28.56891995	28.9863669	39.37960601	6.514122595	-0.002274443	-0.014574302	-0.004093168	0.028528876	-0.007273811	Taylor 1963, Das 2010, Grismer 2011, Chan-ard et al. 2015
Sphenomorphus undulatus	NA	68	0.792171279	NA	NA	NA	NA	28.39201025	29.06856688	39.3527583	7.576734868	-0.001540553	0.005064302	-0.004075824	0.024434791	-0.008609734	Greer and Shea 2004, Allison 2006, McCoy 1980
Spondylurus magnacruzae	NA	107	1.427880218	NA	NA	NA	NA	33.6936448	32.4892818	42.40327695	8.769780605	NA	NA	NA	NA	NA	Hedges and Conn 2012, Giese et al. 2014, Hedges and Meier 2013
Stenocercus aculeatus	NA	108	1.644879191	NA	NA	NA	NA	32.48208423	32.16159712	41.99629494	8.570927833	-0.001137635	0.111196329	-0.014642869	0.011299116	-0.013550519	Duellman 1990, Dixon and Soini 1986, Torres-Carvajal 2007
Stenocercus albolineatus	NA	92.2	1.458103374	NA	NA	NA	NA	NA	NA	NA	NA	-0.002310247	0.008596382	-0.004965385	0.028410912	-0.008659969	Teixeira et al. 2016
Stenocercus azureus	NA	83	1.333973333	NA	NA	NA	NA	32.36834508	32.2144453	41.97903396	9.25410466	-0.001145994	0.052425446	-0.014900296	0.011402854	-0.013149671	Cei 1993, Achaval and Olmos 2003, Torres-Carvajal 2007, Torres-Carvajal 2007b, Carreira et al. 2005, Goldberg 2010,
Stenocercus dumerilii	NA	112	1.687823804	NA	NA	NA	NA	32.49779472	32.15429734	41.99867916	8.476562406	-0.002352511	-0.005640491	-0.002964905	0.030230188	-0.007558001	Avila-Pires 1995, Torres-Carvajal 2007, Torres-Carvajal 2007b, Kohler 2005
Stenocercus erythrogaster	NA	91	1.442633546	NA	NA	NA	NA	32.40809641	32.19597509	41.9850666	9.015337402	-0.001113522	0.093477602	-0.013609095	0.012230511	-0.012560167	Harvey et al. 2004, Torres-Carvajal 2007
Stenocercus huancabambae	NA	99	1.542132094	NA	NA	NA	NA	32.44449611	32.1790622	41.99059059	8.796701758	-0.000814697	0.215416896	-0.022473878	0.000874716	-0.016326847	Cadle 2001, Cadle 1991, Torres-Carvajal 2007, Torres-Carvajal 2007b, Kohler 2005, Koch et al. 2013
Stenocercus limitaris	NA	97	1.518032345	NA	NA	NA	NA	32.43567966	32.18315871	41.98925262	8.849657948	-0.001460572	0.006975762	-0.006811861	0.021723515	-0.010774191	Cadle 1998, Torres-Carvajal 2007, Torres-Carvajal 2007b
Stenocercus orientalis	NA	79	1.275648061	NA	NA	NA	NA	32.34700787	32.2243595	41.97579584	9.382267168	-0.000814697	0.215416896	-0.022473878	0.000874716	-0.016326847	Fritts 1972, Torres-Carvajal 2007, Torres-Carvajal 2007b
Stenocercus prionotus	NA	93	1.468305137	NA	NA	NA	NA	32.41748788	32.1916114	41.98649184	8.958927284	-0.001593504	0.091665447	-0.013049893	0.015688553	-0.011689171	Cadle 2001, Torres-Carvajal 2007, Torres-Carvajal 2007b
Stenocercus squarrosus	NA	88	1.403048386	NA	NA	NA	NA	32.39361491	32.20270383	41.9828689	9.102320852	-0.002336757	-0.088180042	0.001557306	0.035194607	-0.007627629	Nogueira and Rodrigues 2006, Magalhaes et al. 2016
Stenocercus stigmosus	NA	68	1.098591734	NA	NA	NA	NA	32.28223509	32.25445576	41.96596596	9.771326354	-0.000814697	0.215416896	-0.022473878	0.000874716	-0.016326847	Cadle 1998, Torres-Carvajal 2007
Takydromus amurensis	NA	80	1.073018552	NA	NA	NA	NA	33.11343559	33.6665056	43.04890423	5.760205633	-0.00092804	0.084112917	-0.014946752	0.009229023	-0.015487355	Szczerbak 2003, Goris and Maeda 2004, Takenaka 1989, Huang 2006, Shannon 1956, Arnold 1997, Szyndlar 1984, Huang 1998b, Dixon 1956
Takydromus formosanus	NA	64	0.787037103	NA	43.3	5	NA	38.97689119	43.3	43.3	5	NA	NA	NA	NA	NA	Perry and Garland 2002, Takenaka 1989, Huang 2006, Arnold 1997, Uetz 2006, Huang and Tu 2008, Huang 1998b, Norval et al. 2016, Norval et al. 2007
Takydromus haughtonianus	NA	60	0.70432434	NA	NA	NA	NA	32.97855565	33.72917671	43.02843494	6.570365157	-0.001734308	0.008970166	-0.010975999	0.016381227	-0.010931904	Tikader and Sharma 1992
Takydromus hsuehshanensis	NA	72	0.937988197	NA	43.5	2.5	NA	35.82886972	37.53507411	43.5	2.5	NA	NA	NA	NA	NA	Cox et al. 2003, Takenaka 1989, Huang 2006, Arnold 1997, Uetz 2006, Huang and Tu 2008, Todd 2008, Huang 1998, Huang 1998b, Kohler 2005, Lin and Cheng 1981
Takydromus tachydromoides	NA	70	0.901884316	NA	NA	NA	NA	32.95204745	33.59604984	43.01891424	6.251343098	-0.000558509	0.198220119	-0.023730035	0.000495135	-0.019757002	Tinkle et al. 1970, Clobert et al. 1998, Dunham and Miles 1985, Fitch 1970, Bauwens and Diaz-Uriarte 1997, Perry and Garland 2002, Goris and Maeda 2004, Takenaka 1989, Pianka and Vitt 2003, Huang 2006, Arnold 1997, Waltner 1991, Dunham et al. 1988, Warne and Charnov 2008, Huang 1998b, Turner 1977, Shine and Charnov 1992, Bogin et al. 1999, Pike et al. 2008, Mesquita et al. 2016
Teius oculatus	38.6	120	1.719253675	NA	NA	NA	NA	38.6	35.7455852	44.78231927	9.177138082	-0.001398251	0.021868327	-0.011045495	0.016487596	-0.013298006	Cei 1986, Cei 1993, Avila 2002, Scolaro 2006, Carreira et al. 2005, Kohler 2005, Cappellari et al. 2007, Cappellari et al. 2011, Winck and Rocha 2012, Acosta and Martori 1990, Martori and Aun 1993, Cano and Leynaud 2010, Truntau et al. 2016, Cacciali et al. 2016, Pianka et al. 2017,
Teius suquiensis	39	125	1.77439014	NA	NA	NA	NA	39	35.95910538	44.90884808	9.064280615	-0.001614356	-0.085110447	-0.002891936	0.025205578	-0.010040615	Zug et al. 2001, Cei 1993, Avila 2002, Kohler 2005, Martori and Aun 1993, Cacciali et al. 2016, Cespedez et al. 2017
Teius teyou	NA	150	2.020643816	NA	NA	NA	NA	38.46102006	35.54809613	44.71803441	8.509425818	-0.001715881	-0.035186316	-0.004666475	0.024008177	-0.010135183	Fitzgerald et al. 1999, Cei 1986, Cei 1993, Alvarez 2004, Avila 2002, Warne and Charnov 2008, Milstead 1961, Cruz et al. 1999, Kohler 2005, Shine and Wall 2008, Truntau et al. 2016, Cacciali et al. 2016
Tetradactylus ellenbergeri	NA	72	0.382468599	NA	NA	NA	NA	31.37466848	31.99365576	41.98192561	10.209829	-0.002901078	-0.051720266	-0.003988789	0.030801493	-0.008642213	Spawls et al. 2002, Broadley 1971, Salvidio et al. 2004, Branch 2005, Loveridge 1955, Haagner et al. 2000, Wagner et al. 2012, Branch 2014, Branch 2016 (for Tetradactylus fitzsimonsi)
Tetradactylus seps	NA	68	0.870289996	NA	NA	NA	NA	31.55312889	31.91073526	42.00900865	9.137902349	-0.001304554	-0.104030525	-0.004318132	0.021418168	-0.011064425	FitzSimons 1943, Branch 1998, Rogner 1997b, Loveridge 1942, Branch 2016, Conradie et al. 2017
Tetradactylus tetradactylus	NA	73.4	0.403134964	NA	NA	NA	NA	31.38222889	31.99014287	41.98307297	10.16441724	-0.000793077	-0.194102189	-0.000381225	0.020466742	-0.009459614	FitzSimons 1943, Branch 1998, Rogner 1997b, Branch 2016
Tetradactylus udzungwensis	NA	66.5	0.297192286	NA	NA	NA	NA	31.34347172	32.00815114	41.97719121	10.39721305	-0.00211422	-0.07658068	-0.000622788	0.03126381	-0.009093803	Salvidio et al. 2004
Tiliqua adelaidensis	NA	107	1.427880218	NA	NA	NA	NA	33.49244617	32.87410859	42.6173555	7.421637711	-0.000685835	-0.238884689	0.000987206	0.023741376	-0.011389019	Cogger 2000, Wilson and Swan 2003, Greer 2005, Fenner et al. 2007, Milne et al. 2002, Wilson and Swan 2008, Shea 2006, Swanson 2007, Clarke 2000, Brown 2012
Tiliqua gigas	NA	343	3.061464714	NA	NA	NA	NA	34.23689474	32.71593243	43.58867485	5.627957265	-0.001647125	0.010679998	-0.006458986	0.023025959	-0.00881249	Greer 2001, Zweifel 1980, Allison 2006, Loveridge 1948, Allison 2007, Garrick 2008, Allison 1982, Jones 1987, Hamidy and Mulyadi 2007, Hauschild and Gassner 1995
Tiliqua nigrolutea	34.8	368	3.160122606	NA	42.5	5.2	NA	34.8	34.8	42.5	5.2	-0.000673191	0.152163903	-0.020902399	0.003782348	-0.01803411	Greer 2001, Cogger 2000, Wilson and Swan 2003, Greer 1989, Greer 2005, Boretto and Ibarguengoytia 2006, Edwards et al. 2002, Edwards 1999, Shea 2006, Ibarguengoytia and Casalins 2007, Michael and Lindenmayer 2010, Heatwole and Taylor 1987, Swanson 2007, Hutchinson et al. 2001, Brown 2012, Hauschild and Gassner 1995, Sass et al. 2007, Swan et al. 2017
Tiliqua occipitalis	33.7	320	2.96412928	NA	NA	NA	NA	33.7	32.67721789	43.01180594	5.437706821	-0.00064382	-0.172664717	-0.00086424	0.019752897	-0.009833076	Greer 2001, Cogger 2000, Wilson and Swan 2003, Greer 1989, Greer 2005, Shea 2006, Horner 1999, Sinervo et al. 2010, Bush et al. 2010, Bush 1992, Heatwole and Taylor 1987, Swanson 2007, Light et al. 1966, Swan and Watharow 2005, Brown 2012, Swan et al. 2017
Tiliqua rugosa	35.3	350	3.089795715	NA	43	3.5	86.6	35.3	31.9	43	3.5	-0.000818901	-0.134555373	-0.00291698	0.020062131	-0.011033963	Clobert et al. 1998, Greer 2001, Fitch 1970, Cogger 2000, Perry and Garland 2002, Cox et al. 2003, Cooper and Vitt 2002, Pianka and Vitt 2003, Wilson and Swan 2003, Henle 1991, Rogner 1997b, Greer 1989, Greer 2005, Clusella-Trullas et al. 2008, Garrick 2008, Uller et al. 2009, Shea 2006, Henle 1989c, Sinervo et al. 2010, Bush et al. 2010, Michael and Lindenmayer 2010, Hutchinson 1993, MacMillen e…
Tiliqua scincoides	34.4	380	3.205121233	NA	43.9	NA	79.7	34.4	32.6	43.9	5.57208068	-0.001143811	-0.098651426	-0.002714333	0.022524278	-0.009616533	Fitch 1970, Cogger 2000, Wilson and Swan 2003, Rogner 1997b, Greer 2005, Andrews and Pough 1980, Clusella-Trullas et al. 2008, Todd 2008, Shea 2006, Horner 1999, Sinervo et al. 2010, De Magalhaes and Costa 2009, Michael and Lindenmayer 2010, Koenig et al. 2001, Heatwole and Taylor 1987, Swanson 2007, Michael et al. 2011, Brown 2012, Hauschild and Gassner 1995, Price-Rees et al. 2014, Wilson and S…
Timon kurdistanicus	NA	131	1.705067593	NA	NA	NA	NA	NA	NA	NA	NA	-0.000748419	-0.066967021	-0.006272033	0.014013171	-0.010418328	Eiselt 1968
Timon nevadensis	NA	217	2.351892675	NA	NA	NA	NA	NA	NA	NA	NA	-0.000961031	-0.059105834	-0.008110013	0.017951979	-0.014413909	Font et al. 2009, Speybroeck et al. 2016, Kwet 2015
Timon pater	NA	170	2.039054767	NA	NA	NA	NA	31.59270428	32.20939306	42.58108772	4.385777232	-0.000493245	-0.112746242	-0.002781242	0.015939775	-0.009261672	Schleich et al. 1996, Vanhooydonck and Van Damme 1999, Street 1979, Rogner 1997b, Bons and Geniez 1996, Kohler 2005, Bouam et al. 2017, Saoudi et al. 2017
Timon princeps	NA	148	1.861442322	NA	NA	NA	NA	32.30253781	32.69425953	42.82308745	4.79298549	-0.000748419	-0.066967021	-0.006272033	0.014013171	-0.010418328	Anderson 1999, Baran and Atatur 1998, Kohler 2005, Eiselt 1968
Toenayar novemcarinata	NA	100	1.333	NA	NA	NA	NA	NA	NA	NA	NA	NA	NA	NA	NA	NA	Taylor 1963, Das 2010, Grismer 2011, Chan-ard et al. 2015
Tracheloptychus madagascariensis	NA	90	1.245838142	NA	NA	NA	NA	31.88910464	31.96343523	42.09441182	8.317020671	-0.001338412	-0.026810081	-0.00966697	0.019407206	-0.011664869	Glaw and Vences 1994, Henkel and Schmidt 2000, Raselimanana 2004, Rogner 1997b, Glaw and Vences 2007
Tracheloptychus petersi	NA	97	1.3461908	NA	NA	NA	NA	31.9258168	31.94637715	42.09998324	8.096508226	NA	NA	NA	NA	NA	Glaw and Vences 1994, Henkel and Schmidt 2000, Raselimanana 2004, Rogner 1997b, Glaw and Vences 2007, McElroy et al. 2008
Trachylepis acutilabris	NA	60	0.616650387	NA	NA	NA	NA	33.37619354	32.64503886	42.39498472	11.19062698	-0.001623055	-0.184416427	-0.002400406	0.024472579	-0.012117569	FitzSimons 1943, Branch 1998, Schmidt et al. 1919, Haacke 2008, Cooper and Whiting 2000, Branch 2016, Butler 2005
Trachylepis albilabris	NA	75	0.929572819	NA	NA	NA	NA	33.84074817	33.07663579	42.59262775	10.48304856	-0.002363276	-0.014085451	-0.007328235	0.026273476	-0.008648111	Loveridge 1941, Hughes 1988, Chirio and LeBreton 2007, Pauwels and Vande weghe 2008, Fitch 1982, Jackson and Blackburn 2010, Segniagbeto et al. 2015, Pauwels et al. 2017f
Trachylepis albotaeniata	NA	65	0.728897229	NA	NA	NA	NA	NA	NA	NA	NA	-0.001923316	-0.085560508	-0.001706727	0.028300521	-0.010143788	Pakenham 1983
Trachylepis aureopunctata	NA	82	1.054704929	NA	NA	NA	NA	33.53644767	32.57057779	42.41930478	10.22805678	-0.001571104	-0.023853724	-0.009574256	0.019506211	-0.011414049	Glaw and Vences 1994, Henkel and Schmidt 2000, Raselimanana and Rakotomalala 2004, Glaw and Vences 2007
Trachylepis bayonii	NA	82	1.054704929	NA	NA	NA	NA	33.53644767	32.57057779	42.41930478	10.22805678	-0.002708701	-0.027728568	-0.005981201	0.028597341	-0.008323818	Fitch 1970, Spawls et al. 2002, Branch 2005
Trachylepis brauni	NA	82	1.054704929	NA	NA	NA	NA	33.53644767	32.57057779	42.41930478	10.22805678	-0.001970611	-0.044785577	-0.004916119	0.024507719	-0.010486204	Spawls et al. 2002, Broadley 2000
Trachylepis capensis	32.5	135	1.753847738	NA	NA	NA	NA	32.5	31.69343532	42.03807091	8.663546982	-0.001002779	-0.12767333	-0.00281198	0.019317879	-0.009406996	FitzSimons 1943, Branch 1998, Cox et al. 2003, Flemming 1993, Huang 2006b, Broadley 1971, Rogner 1997b, Auerbach 1987, Broadley 2000, Meik et al. 2002, Flemming 1994, Brownlie and Loveridge 1983, Hauschild and Gassner 1995, Branch 2016
Trachylepis depressa	NA	87	1.137707667	NA	NA	NA	NA	33.56681268	32.55646888	42.42391296	10.04566862	-0.001592912	-0.069989185	-0.002982879	0.026174781	-0.009842655	FitzSimons 1943, Branch 1998, Broadley 2000, Broadley 1992, Pienaar 1966, Broadley 2008
Trachylepis dumasi	NA	55	0.494631124	NA	NA	NA	NA	33.33155506	32.66577986	42.38821041	11.45874908	-0.001338412	-0.026810081	-0.00966697	0.019407206	-0.011664869	Raselimanana and Rakotomalala 2004, Nussbaum and Raxworthy 1995, Glaw and Vences 2007
Trachylepis elegans	NA	69.9	0.8308168	NA	NA	NA	NA	33.45454235	32.60863458	42.40687488	10.72002301	-0.001803796	-0.020897368	-0.009481541	0.019605217	-0.01116323	Glaw and Vences 1994, Henkel and Schmidt 2000, Raselimanana and Rakotomalala 2004, Ramanamanjato 2000, Glaw and Vences 2007, Lima et al. 2014
Trachylepis gravenhorstii	NA	94	1.246229839	NA	NA	NA	NA	33.60651351	32.53802214	42.42993793	9.807204692	-0.001571104	-0.023853724	-0.009574256	0.019506211	-0.011414049	Andreone and Greer 2002, Glaw and Vences 1994, Henkel and Schmidt 2000, Raselimanana and Rakotomalala 2004, Ramanamanjato 2000, Ramanamanjato et al. 1999, Glaw and Vences 2007, Lima et al. 2014
Trachylepis infralineata	NA	108	1.440925306	NA	NA	NA	NA	35.2302465	33.41597351	42.94540675	9.413302931	NA	NA	NA	NA	NA	Sanchez and Probst 2015, Probst 1999
Trachylepis irregularis	NA	75	0.929572819	NA	NA	NA	NA	31.75391112	31.57267875	41.84780485	10.46507644	-0.001916659	-0.125853179	-0.000428562	0.029747771	-0.009014399	Fitch 1970, Spawls et al. 2002, Loveridge 1936, Barbour and Loveridge 1928, Branch 2005, Branch 2014
Trachylepis lavarambo	NA	61	0.639830037	NA	NA	NA	NA	33.38467339	32.64109876	42.39627161	11.13969259	NA	NA	NA	NA	NA	Raselimanana and Rakotomalala 2004, Nussbaum and Raxworthy 1998, Glaw and Vences 2007
Trachylepis occidentalis	36.3	115	1.528993327	NA	NA	NA	NA	36.3	34.00985258	43.28755851	9.24245122	-0.000662364	-0.162316073	-0.00132297	0.016706607	-0.007996546	FitzSimons 1943, Branch 1998, Pianka 1986, Pianka and Vitt 2003, Auerbach 1987, Broadley 2000, Huey et al. 2001, Sinervo et al. 2010, Huey and Pianka 2007, Vitt and Pianka 1977, Huey and Pianka 1977, Mesquita et al. 2016, Huey and Pianka 2017, Pianka et al. 2017,
Trachylepis perrotetii	NA	180	2.157274919	NA	NA	NA	NA	35.10736295	34	43.08174476	7.73869254	-0.00141348	-0.102324703	0.000786015	0.026538707	-0.006320245	Greer 2001, Papenfuss 1969, Hughes 1988, Dunger 1972, Schmidt et al. 1919, Chirio and LeBreton 2007, Leache et al. 2006, Sinervo et al. 2010, Barbault 1974, Chirio, Pers comm. 3.6.2011, Muchlinski et al. 1995, Cisse and Karns 1978, Trape et al. 2012, Auliya et al. 2012, Hauschild and Gassner 1995, Sura 1987, Pauwels and Meirte 1996
Trachylepis polytropis	NA	114	1.516745765	NA	NA	NA	NA	33.70547674	32.4920395	42.44495653	9.212779701	-0.00284717	-0.008194782	-0.00704422	0.029014232	-0.007681262	Hughes 1988, Schmidt et al. 1919, Chirio and LeBreton 2007, Pauwels and Vande weghe 2008, Reid 1986, Chirio et al. 2008, Scott 1982, Trape et al. 2012, Segniagbeto et al. 2015
Trachylepis rodenburgi	NA	75	0.929572819	NA	NA	NA	NA	33.49067041	32.59184791	42.41235766	10.50301898	-0.001724877	-0.114262382	0.00364129	0.034374099	-0.007289709	Hughes 1988, Hoogmoed 1974, Trape et al. 2012
Trachylepis tavaratra	NA	62	0.662632765	NA	NA	NA	NA	33.39301534	32.63722272	42.39753758	11.08958644	NA	NA	NA	NA	NA	Raselimanana and Rakotomalala 2004, Ramanamanjato et al. 1999b, Glaw and Vences 2007, Huey et al. 2001
Trachylepis thomensis	NA	98.2	1.307527994	NA	NA	NA	NA	NA	NA	NA	NA	NA	NA	NA	NA	NA	Ceriaco et al. 2016, Pollo 2017
Trachylepis wingati	NA	100	1.333	NA	NA	NA	NA	33.63825676	32.52327284	42.43475527	9.616538091	-0.002193741	-0.095233188	-0.003045116	0.027265783	-0.007682236	Largen and Spawls 2006, Largen and Spawls 2010
Trapelus agilis	38	116	1.724142057	NA	NA	NA	NA	38	37.23300944	45.92413096	10.44248511	-0.000380884	-0.107859381	-0.000313351	0.014763029	-0.006630179	Smith 1935, Anderson 1999, Minton 1966, Tikader and Sharma 1992, Leviton et al. 1992, Boulenger 1890, Leviton and Anderson 1970, Khan 2006, Anderson 1963, Clark 1990, Leviton and Anderson 2013, Bohme 1989, Leviton 1959, Agarwal et al. 2015, Martin et al. 2017, Das and Das 2017
Trapelus agnetae	38.5	93.5	1.433370052	NA	NA	NA	NA	38.5	37.63826879	46.1050962	11.0946676	-0.000261322	-0.130156524	-1.80E-05	0.014534126	-0.006988422	Wagner et al. 2011, Bar and Haimovitch 2012, Werner 1995, Werner 2016
Trapelus megalonyx	NA	75	1.136065223	NA	NA	NA	NA	37.36980402	37.08940561	45.75656239	11.72564289	-0.000333252	-0.101715211	-0.000342197	0.012842833	-0.006089637	Minton 1966, Khan 2006, Khan 2015, Das and Das 2017
Trapelus mutabilis	38.5	98.8	1.507720313	NA	NA	NA	NA	38.5	37.60966926	46.10038245	10.93069796	-0.000246513	-0.129155458	-0.000113666	0.014558073	-0.006728142	Schleich et al. 1996, Geniez et al. 2004, Flower 1933, El Din 2006, Le Berre 1989, Bons and Geniez 1996, Kohler 2005, Wagner et al. 2011, Trape et al. 2012, Goldberg 2013, Masood and Asiry 2012, Schleich 1987
Trapelus rubrigularis	NA	95	1.454831794	NA	NA	NA	NA	37.48641885	37.03522126	45.77425978	11.02519312	-0.000477146	-0.083463214	0.000303444	0.014378738	-0.005523182	Smith 1935, Minton 1966, Khan 2006
Trapelus savignii	37.9	123	1.803155371	NA	47.2	12	NA	37.9	37.47409409	47.2	12	-0.000565264	-0.156974838	-0.000814929	0.018292386	-0.008533771	Frankenberg and Werner 1992, Amitai and Bouskila 2001, Flower 1933, El Din 2006, Le Berre 1989, Kohler 2005, Hertz et al. 1983, Hertz and Nevo 1981, Bar and Haimovitch 2012, Ibrahim 2001, Goldberg 2013, Werner 1995, Werner 2016, 5-6 (TAU experimental zoo data)
Tretioscincus bifasciatus	NA	58	0.644839235	NA	NA	NA	NA	29.87092839	30.8772456	41.48796281	9.898388394	-0.001440667	-0.009214351	-0.004961733	0.022968085	-0.008801853	Beebe 1945, Schwartz and Henderson 1991, van Buurt 2005, Test et al. 1966, Ugueto and Rivas 2010
Tretioscincus oriximinensis	NA	55	0.568677601	NA	NA	NA	NA	29.84306607	30.89019165	41.48373444	10.06574408	-0.001771489	-0.006315752	-0.002427368	0.027224518	-0.007542091	Avila-Pires 1995, Vitt and Zani 1998, Ribeiro-Junior and Amaral 2017, Moraes et al. 2017
Tribolonotus gracilis	24.6	103	1.374451399	NA	NA	NA	NA	24.6	27.24345046	39.38389791	7.138231663	-0.001753697	0.016295694	-0.008842148	0.021617127	-0.009015246	Zweifel 1980, Greer 1977, Cogger 1972, Greer and Parker 1968, Kohler 2005
Tribolonotus pseudoponceleti	NA	76	0.948147089	NA	NA	NA	NA	28.24636797	29.54720259	40.59621748	8.158050587	NA	NA	NA	NA	NA	Greer 1977, McCoy 1980, McCoy 2006, Greer and Parker 1968, McCoy 2015
Tropidoscincus boreus	NA	95	1.261069521	NA	NA	NA	NA	29.95575107	29.41019941	40.80540004	4.408611909	NA	NA	NA	NA	NA	Bauer and Sadlier 2000, Shea et al. 2009, Whittaker et al. 2004
Tropidoscincus variabilis	NA	95	1.261069521	NA	NA	NA	NA	29.95575107	29.41019941	40.80540004	4.408611909	NA	NA	NA	NA	NA	Bauer and DeVaney 1987, Bauer and Sadlier 2000, Bauer and Vindum 1990, Shea et al. 2009, Sadlier 1987
Tropidurus cocorobensis	NA	74.6	1.207976872	NA	NA	NA	NA	34.85871221	34.0581473	42.87598028	9.553375029	-0.002079717	-0.106879225	0.001285806	0.033449338	-0.008458641	Kohlsdorf et al. 2001, Rodrigues 2003, Rodrigues 1996, Grizante et al. 2011, Brandt and Navas 2011, Ribeiro et al. 2012, Mesquita et al. 2016, Xavier and Dias 2015, Xavier and Dias 2017
Tropidurus hygomi	35.4	80	1.290501675	NA	NA	NA	NA	35.4	33.5	42.84585659	9.466649533	-0.002041342	-0.105383387	-0.000123057	0.031432789	-0.009374333	Kohlsdorf et al. 2001, Kohlsdorf and Navas 2006, Kohlsdorf and Navas 2007, Sinervo et al. 2010, Grizante et al. 2011, Brandt and Navas 2011, Rocha et al. 2009, Travassos et al. 2015, Xavier and Dias 2015, Alcantara et al. 2015, Xavier and Dias 2017
Tropidurus psammonastes	37.6	99.1	1.543324267	NA	NA	NA	NA	37.6	34.5	43.49885657	8.976301677	-0.00222255	-0.069040054	-0.000945565	0.031416127	-0.009352904	Kohlsdorf and Navas 2006, Lima and da Rocha 2006, Kohlsdorf and Navas 2007, Rodrigues 2003, Rodrigues 1996, Sinervo et al. 2010, Dutra et al. 2011, Grizante et al. 2011, Brandt and Navas 2011, Rocha and Rodrigues 2005, Rocha et al. 2009
Tumbunascincus luteilateralis	NA	112	1.491924995	NA	NA	NA	NA	27.18062716	28.67003781	38.02872562	4.867050215	-0.001281711	-0.100504908	-0.003364984	0.022652817	-0.009781045	Cogger 2000, Wilson and Swan 2003, Greer 1989, Greer 2005, Wilson and Swan 2008, Brown 2012
Tupinambis cryptus	NA	391	3.314669716	NA	NA	NA	NA	NA	NA	NA	NA	-0.002686027	-0.005714998	-0.00356604	0.030631827	-0.007207166	Murphy et al. 2016
Tupinambis longilineus	NA	255	2.737339961	NA	NA	NA	NA	35.96367113	33.64770319	43.33581331	5.416762022	-0.001885349	0.007547153	-0.005243036	0.025987134	-0.008434937	Avila-Pires 1995, Pianka and Vitt 2003, Costa et al. 2008, Ribeiro-Junior and Amaral 2016, Moraes et al. 2017
Tupinambis matipu	NA	326	3.069106736	NA	NA	NA	NA	NA	NA	NA	NA	-0.002310247	0.008596382	-0.004965385	0.028410912	-0.008659969	Silva et al. 2018
Tupinambis quadrilineatus	37.2	270	2.814541307	NA	NA	NA	NA	37.2	34.34351238	43.73280117	5.273514452	-0.002488513	-0.038199988	-0.003263444	0.031012986	-0.008189159	Mesquita et al. 2006b, Colli et al. 2002, Silveira 2009, da Silva et al. 2013, Morato et al. 2015
Tupinambis teguixin	35	500	3.646796713	NA	NA	NA	NA	35	32.7323684	42.96490252	3.390022628	-0.002112125	-0.003622817	-0.005377123	0.026631464	-0.008926753	Fitch 1970, Anderson and Vitt 1990, Fitzgerald et al. 1991, Zug et al. 2001, Pianka and Vitt 2003, Avila-Pires 1995, Martins 1991, Vitt and de Carvalho 1995, Duellman 1978, Beebe 1945, Rodrigues and Cadle 1990, Zimmerman and Rodrigues 1990, Duellman 1990, Pianka and Vitt 2003, Cei 1986, Cei 1993, Dixon and Soini 1986, Hoogmoed 1973, Rogner 1997b, Vitt and Zani 1998, Duellman 2005, Bartlett and Ba…
Tympanocryptis cephalus	NA	64	0.922188819	NA	NA	NA	NA	35.96009691	35.59085648	44.51613424	6.863408624	-0.000493013	-0.158558563	-0.000616106	0.017864634	-0.00865446	Cogger 2000, Wilson and Swan 2003, Jones 2004, Greer and Smith 2000, Swanson 2007, Brown 2012, Doughty et al. 2015
Tympanocryptis diabolicus	NA	60.5	0.846350438	NA	NA	NA	NA	NA	NA	NA	NA	-0.000504357	-0.15241127	-0.000299697	0.016978883	-0.008167582	Doughty et al. 2015
Tympanocryptis fortescuensis	NA	65	0.943095972	NA	NA	NA	NA	NA	NA	NA	NA	-0.000504357	-0.15241127	-0.000299697	0.016978883	-0.008167582	Doughty et al. 2015
Tympanocryptis gigas	NA	66.5	0.973861209	NA	NA	NA	NA	NA	NA	NA	NA	-0.000504357	-0.15241127	-0.000299697	0.016978883	-0.008167582	Doughty et al. 2015
Tympanocryptis houstoni	NA	68	1.003940174	NA	NA	NA	NA	35.81352749	35.47339985	44.46330726	6.679914783	-0.001061203	-0.165462265	-0.002278976	0.022901472	-0.013088551	Storr 1982
Tympanocryptis pentalineata	NA	59.1	0.814779128	NA	NA	NA	NA	NA	NA	NA	NA	-0.001117477	-0.142076506	0.001160608	0.025853415	-0.007353611	Melville et al. 2014
Tympanocryptis pinguicolla	NA	59.5	0.823875179	NA	NA	NA	NA	35.74765405	35.50400752	44.45331035	7.075585141	-0.000904095	0.035707002	-0.013156945	0.012051368	-0.014827713	Wilson and Swan 2003, Dimond et al. 2012, Chen et al. 2013, Swan et al. 2017
Tympanocryptis pseudopsephos	NA	56.5	0.75411043	NA	NA	NA	NA	NA	NA	NA	NA	-0.000427026	-0.169173938	-0.000433399	0.017332274	-0.007983933	Doughty et al. 2015
Tytthoscincus atrigularis	NA	39	0.012547616	NA	NA	NA	NA	28.56314103	29.62273793	39.87359142	9.660515125	NA	NA	NA	NA	NA	Brown and Alcala 1980, Alcala 1986, Taylor 1923
Tytthoscincus batupanggah	NA	33.2	-0.213245128	NA	NA	NA	NA	NA	NA	NA	NA	-0.002514078	-0.000793217	-0.008297432	0.027001922	-0.007132104	Karin et al. 2016
Tytthoscincus biparietalis	NA	36	-0.099699225	NA	NA	NA	NA	28.52207761	29.6418178	39.86735966	9.907163552	NA	NA	NA	NA	NA	Brown and Alcala 1980, Taylor 1923
Tytthoscincus bukitensis	NA	44	0.181708692	NA	NA	NA	NA	NA	NA	NA	NA	-0.002274443	-0.014574302	-0.004093168	0.028528876	-0.007273811	Grismer 2007, Das 2010, Grismer 2011
Tytthoscincus butleri	NA	44	0.181708692	NA	NA	NA	NA	NA	NA	NA	NA	NA	NA	NA	NA	NA	Das 2010, Grismer 2011, Chan-ard et al. 2015
Tytthoscincus ishaki	NA	50	0.360974144	NA	NA	NA	NA	NA	NA	NA	NA	-0.002274443	-0.014574302	-0.004093168	0.028528876	-0.007273811	Grismer 2006, Grismer and Pan 2008, Das 2010, Grismer 2011, Grismer 2011b, Chan-ard et al. 2015
Tytthoscincus leproauricularis	NA	33.5	-0.200630318	NA	NA	NA	NA	NA	NA	NA	NA	-0.002514078	-0.000793217	-0.008297432	0.027001922	-0.007132104	Karin et al. 2016
Tytthoscincus perhentianensis	NA	30	-0.355375469	NA	NA	NA	NA	NA	NA	NA	NA	NA	NA	NA	NA	NA	Grismer et al. 2009, Grismer 2011
Tytthoscincus sibuensis	NA	NA	NA	NA	NA	NA	NA	NA	NA	NA	NA	-0.002274443	-0.014574302	-0.004093168	0.028528876	-0.007273811	Grismer 2006, Grismer and Pan 2008, Das 2010, Grismer 2011, Grismer 2011b, Grismer et al. 2016
Tytthoscincus temengorensis	NA	35.5	-0.119312648	NA	NA	NA	NA	NA	NA	NA	NA	NA	NA	NA	NA	NA	Grismer et al. 2009, Grismer 2011
Uma cowlesi	39.7	120	1.710968196	NA	NA	NA	NA	NA	NA	NA	NA	-0.000637321	-0.121150835	-0.001022612	0.018429706	-0.008252719	Jones and Lovich 2009, Brennan and Holycross 2009, Foster et al. 2015, Albuquerque et al. 2015, Rorabaugh and Lemos-Espinal 2016 (as Uma rufopunctata)
Uma exsul	38.7	100	1.499	NA	NA	NA	NA	38.7	37.7156806	45.111207	10.06670912	-0.000982764	-0.090994173	-0.004173581	0.019900944	-0.011555729	Schmidt and Bogert 1947, Gadsden et al. 2006, Commins and Savitzky 1973, Lemos-Espinal and Smith 2007, Sinervo et al. 2010, Barbault and Maury 1981, Pough et al. 1978, Aguirre and Gatica 2010, Cooper et al. 2013, Shenbrot et al. 1991
Uma inornata	38	124	1.749089851	NA	45	NA	NA	38	37.5	45	9.521009868	NA	NA	NA	NA	NA	Tinkle et al. 1970, Dunham and Miles 1985, Fitch 1970, 1985, Stebbins 2003, Herrel et al. 2002, Cooper and Vitt 2002, Smith 1946, Pough 1973, Sinervo et al. 2010, Jones and Lovich 2009, Stebbins and McGinnis 2012, Pianka and Parker 1972, Barrows et al. 2010, Mesquita et al. 2016, Olberding et al. 2016, Butler 2005
Uma notata	40	122	1.730185267	NA	NA	NA	81.1	40	38.67490392	45.64637135	9.604195136	-0.000637321	-0.121150835	-0.001022612	0.018429706	-0.008252719	Tinkle et al. 1970, Dunham and Miles 1985, Fitch 1985, Stebbins 2003, Grismer 2002, Ortega-Rubio et al. 1995, Smith 1946, Rogner 1997a, Van Denburgh 1922, Dunham et al. 1988, Bergmann et al. 2009, Todd 2008, Jones and Lovich 2009, Sinervo et al. 2010, Curry-Lindahl 1979, Brennan and Holycross 2009, Brattstrom 1965, Stebbins and McGinnis 2012, Lemm 2006, Goldberg 2012, Pianka and Parker 1972, Agui…
Uma paraphygas	39	89	1.363517048	NA	NA	NA	NA	39	37.94384209	45.21731483	10.37205283	-0.000866497	-0.191379513	0.000960348	0.025447296	-0.009417318	Cooper and Vitt 2002, Castaneda-Gaytan et al. 2003, Lemos-Espinal and Smith 2007, Lemos-Espinal and Smith 2007b, Sinervo et al. 2010, Cicek et al. 2011, Aguirre and Gatica 2010
Uma scoparia	37.8	116	1.671554037	NA	NA	NA	80.7	37.8	37.5	44.93439266	9.658062403	-0.00070289	-0.093857762	-0.003490176	0.017612976	-0.010416397	Tinkle et al. 1970, Dunham and Miles 1985, Huey and Pianka 1981, Melville et al. 2006, Fitch 1985, Stebbins 2003, Pianka 1986, Smith 1946, Greene 1982, Clusella-Trullas et al. 2008, Huey et al. 2001, Pough 1974, Jones and Lovich 2009, Sinervo et al. 2010, Huey and Pianka 2007, Brennan and Holycross 2009, Mayhew 1966, Stebbins and McGinnis 2012, Pianka and Parker 1972, Mesquita et al. 2016, Korff …
Uromastyx acanthinura	38	400	3.393396273	NA	NA	NA	NA	38	35.01257484	43.97229349	3.684636056	-0.000245743	-0.134884922	-0.000525701	0.014583892	-0.006953663	Clobert et al. 1998, Fitch 1970, Schleich et al. 1996, Perry and Garland 2002, Geniez et al. 2004, Pianka and Vitt 2003, Rogner 1997a, Le Berre 1989, Manthey and Schuster 1996, Bons and Geniez 1996, Garrick 2008, Turner 1977, Kohler 2005, Damuth 1987, Trape et al. 2012, Wilms 2005
Uromastyx aegyptia	41.5	418	3.452752355	NA	NA	NA	NA	41.5	37.07984425	45.11486347	3.626616491	-0.000334057	-0.159167377	0.001012854	0.017141822	-0.006989492	Amitai and Bouskila 2001, Anderson 1999, Perry and Garland 2002, Disi et al. 2001, Flower 1933, Gallagher 1971, Arnold 1984, El Din 2006, Arnold 1980, Schatti and Desvoignes 1999, Le Berre 1989, Jongbloed 2000, Hornby 1996, Arbel 1984, Wilms and Bohme 2000, Kohler 2005, Nemtzov 2008, Zari 1991, van der Kooij 2001, Bar and Haimovitch 2012, Bringsoe 1998, Rappeport 1974, Wilms 2005, Wilms et al. 20…
Uromastyx dispar	NA	232	2.658840193	NA	NA	NA	NA	37.5125661	35.00909161	43.86041798	5.293953276	-0.000168965	-0.123153768	0.000578433	0.013688801	-0.005994239	Geniez et al. 2004, Joger and Lambert 1996, Kohler 2005, Trape et al. 2012, Wilms 2005
Uromastyx macfadyeni	NA	122	1.792147274	NA	NA	NA	NA	36.58054764	34.79554388	43.61240272	7.184968053	-0.000445252	-0.174312167	0.000875446	0.019615041	-0.005854219	Parker 1932, Parker 1942
Uromastyx nigriventris	NA	250	2.759603727	NA	NA	NA	NA	37.49265696	34.95864885	43.84755797	5.071297709	-0.00026829	-0.126298678	0.000176272	0.014269316	-0.006382833	Wilms et al. 2009, Pauwels et al. 2017
Uromastyx occidentalis	NA	308	3.040949975	NA	NA	NA	NA	37.37311962	34.81521537	43.7991771	4.444760373	-8.41E-05	-0.128767244	0.000341639	0.013640019	-0.006296511	Geniez et al. 2004, Trape et al. 2012, Wilms 2005
Uromastyx thomasi	36.3	190	2.389529931	NA	NA	NA	NA	36.3	34.43734652	43.49195344	5.857809528	-0.000413076	-0.213230133	0.002836311	0.021004754	-0.007095796	Gallagher 1971, Arnold 1980, van der Kooij 2001, Wilms 2005, Gardner 2013
Vanzosaura savanicola	NA	35.6	-0.055112107	NA	NA	NA	NA	29.93031275	31.1813365	41.55164271	11.44333565	-0.002579319	-0.099698461	0.001271594	0.036198886	-0.007426686	Recoder et al. 2014
Varanus bengalensis	37	900	4.255974518	NA	NA	NA	NA	37	34.78871794	43.64843812	2.835563168	-0.001442171	-0.105021008	0.000455883	0.024865813	-0.006289061	Fitch 1970, Pianka 1995, Thompson and Pianka 2001, Anderson 1999, Perry and Garland 2002, Schleich and Kastle 2002, Zug et al. 2001, Pianka and King 2004, Daniel 1983, Tikader and Sharma 1992, Taylor 1963, Pianka and Vitt 2003, Rogner 1997b, Cox et al. 1998, Anderson and Leviton 1969, De Lisle 1996, Khan 2006, Deraniyagala 1953, Clark 1990, Pauwels et al. 2003, Shrestha 2001, Andrews and Pough 19…
Varanus brevicaudus	34.5	126	1.493698713	NA	NA	NA	NA	NA	NA	NA	NA	-0.000491241	-0.149176825	-0.000773291	0.017406099	-0.008793368	Pianka 1994, 1995, Thompson and Pianka 2001, Cogger 2000, Cox et al. 2003, James et al. 1992, Pianka and King 2004, Pianka 1986, Pianka and Vitt 2003, Wilson and Swan 2003, Rogner 1997b, Greer 1989, De Lisle 1996, Sweet and Pianka 2007, Huey et al. 2001, Horn and Visser 1997, Eidenmueller and Philippen 2008, Thompson et al. 2008, Frydlova and Frynta 2010, Clemente et al. 2009, Morton and James 19…
Varanus doreanus	NA	460	3.313021585	NA	NA	NA	NA	31.59675971	32.47094794	42.06849598	4.748608257	-0.001647125	0.010679998	-0.006458986	0.023025959	-0.00881249	Zug et al. 2001, Pianka and King 2004, Allison 2006, Philipp et al. 2007, Philipp and Philipp 2007, Eidenmueller and Philippen 2008, Philipp et al. 2007, Hamidy and Mulyadi 2007, Arbuckle 2009
Varanus douarrha	NA	530	3.512032438	NA	NA	NA	NA	NA	NA	NA	NA	NA	NA	NA	NA	NA	Weijola et al. 2017
Varanus eremius	39	202	2.15681168	NA	NA	NA	NA	39	37.2600817	44.54830387	7.46021266	-0.000470564	-0.159443588	-0.000585448	0.01775614	-0.008581366	Pianka 1982, 1994, 1995, Cogger 2000, James et al. 1992, Pianka and King 2004, Pianka 1986, Pianka and Vitt 2003, Wilson and Swan 2003, Henle 1991, Greer 1989, De Lisle 1996, Sweet and Pianka 2007, Huey et al. 2001, Pianka 2007, Eidenmueller and Philippen 2008, Pianka 2007, Thompson et al. 2008, Sinervo et al. 2010, Kohler 2005, Frydlova and Frynta 2010, Huey and Pianka 2007, Clemente et al. 2009…
Varanus flavescens	NA	515	3.471696386	NA	NA	NA	NA	33.08122659	31.5	42.11717553	4.607185037	-0.001258922	-0.093966816	0.001856793	0.02475869	-0.005137992	Pianka 1995, Thompson and Pianka 2001, Perry and Garland 2002, Schleich and Kastle 2002, Pianka and King 2004, Daniel 1983, Tikader and Sharma 1992, Taylor 1963, Rogner 1997b, De Lisle 1996, Khan 2006, Shrestha 2001, Sweet and Pianka 2007, Sweet and Pianka 2007, Eidenmueller and Philippen 2008, Das 2002, Kohler 2005, Frydlova and Frynta 2010, Ahmed et al. 2009, Ahmed 2009, Arbuckle 2009, Ghimire …
Varanus giganteus	38.2	950	4.331935863	NA	NA	NA	NA	38.2	35.7349711	43.92198659	2.797403882	-0.000461338	-0.159682853	-0.000539227	0.017746987	-0.008473231	Pianka 1994, 1995, Thompson and Pianka 2001, Cogger 2000, Perry and Garland 2002, James et al. 1992, Pianka and King 2004, King et al. 1989, Wilson and Swan 2003, Rogner 1997b, Greer 1989, De Lisle 1996, Clusella-Trullas et al. 2008, Brown and Nagy 2007, Losos and Greene 1988, Horn and Visser 1997, Eidenmueller and Philippen 2008, Heger and Heger 2007, Thompson et al. 2008, Sinervo et al. 2010, K…
Varanus gouldii	38.5	670	3.841351987	NA	43.5	NA	78.2	38.5	35.1	43.5	3.736373198	-0.000812537	-0.156713251	-0.000236082	0.021485328	-0.008911207	Pianka 1982, 1994, 1995, Cogger 2000, Shine 1986, Perry and Garland 2002, Cox et al. 2003, James et al. 1992, Pianka and King 2004, Pianka 1986, Pianka and Vitt 2003, Wilson and Swan 2003, Henle 1991, Rogner 1997b, Greer 1989, De Lisle 1996, Pengilley 1981, Sweet and Pianka 2007, Clusella-Trullas et al. 2008, Brown and Nagy 2007, Garrick 2008, Losos and Greene 1988, Huey et al. 2001, Chapman and …
Varanus griseus	38.5	625	3.743671856	NA	NA	NA	NA	38.5	36.74495982	44.38594861	3.698175425	-0.000307335	-0.127804159	-0.000361842	0.015213657	-0.007178568	Pianka 1995, Thompson and Pianka 2001, Smith 1935, Schleich et al. 1996, Amitai and Bouskila 2001, Szczerbak 2003, Anderson 1999, Minton 1999, Perry and Garland 2002, Disi et al. 2001, Baran and Atatur 1998, Pianka and King 2004, Tikader and Sharma 1992, Geniez et al. 2004, Flower 1933, Pianka and Vitt 2003, Arnold 1984, El Din 2006, Rogner 1997b, De Lisle 1996, Schatti and Desvoignes 1999, Le Be…
Varanus komodoensis	38	1570	5.037735376	NA	NA	NA	NA	38	35.49814063	44.18102608	1.915565385	NA	NA	NA	NA	NA	Pianka 1995, Thompson and Pianka 2001, Perry and Garland 2002, Pianka and King 2004, Pianka and Vitt 2003, de Rooij 1915, De Lisle 1996, Sweet and Pianka 2007, Brown and Nagy 2007, Horn and Visser 1997, Auffenberg 1981, Eidenmueller and Philippen 2008, de Buffrenil and Rimblot-Baly 1999, Sinervo et al. 2010, Kohler 2005, De Magalhaes and Costa 2009, Frydlova and Frynta 2010, King and Green 1993, …
Varanus nesterovi	NA	510	3.45798952	NA	NA	NA	NA	NA	NA	NA	NA	-0.000361246	-0.114895134	-0.000305947	0.015991064	-0.006837928	Bohme et al. 2015
Varanus obor	NA	440	3.250569408	NA	NA	NA	NA	35.03582415	34.5130906	43.19036131	4.961470626	NA	NA	NA	NA	NA	Weijola and Sweet 2010
Varanus panoptes	36.4	740	3.980964613	NA	NA	NA	87.3	36.4	34.5058555	43.1677516	3.468728193	-0.000962146	-0.145899771	0.000385711	0.023145072	-0.007970838	Pianka 1995, Thompson and Pianka 2001, Cogger 2000, Shine 1986, James et al. 1992, Pianka and King 2004, Pianka and Vitt 2003, Wilson and Swan 2003, Allison 2006, Greer 1989, Sweet and Pianka 2007, Paden 2008, Clusella-Trullas et al. 2008, Brown and Nagy 2007, Philipp and Philipp 2007, Eidenmueller and Philippen 2008, Thompson et al. 2008, Sinervo et al. 2010, Kohler 2005, Frydlova and Frynta 201…
Varanus rosenbergi	36.3	518	3.479856773	NA	NA	NA	93.2	36.3	35.2	43.34841761	4.554521466	-0.000934804	-0.054405579	-0.00828537	0.017152637	-0.01439669	Pianka 1995, Thompson and Pianka 2001, Cogger 2000, Perry and Garland 2002, James et al. 1992, Pianka and King 2004, Wilson and Swan 2003, Greer 1989, De Lisle 1996, Nagy et al. 1999, Sweet and Pianka 2007, Brown and Nagy 2007, Eidenmueller and Philippen 2008, Thompson et al. 2008, Sinervo et al. 2010, Kohler 2005, Frydlova and Frynta 2010, Bush et al. 2010, Sutherland 2011, Michael and Lindenmay…
Varanus sparnus	NA	116.4	1.382357891	NA	NA	NA	NA	NA	NA	NA	NA	-0.000862915	-0.212584486	0.003442785	0.027778266	-0.00757698	Doughty et al. 2014
Varanus spenceri	NA	580	3.638689559	NA	NA	NA	73.6	35.9634539	34.80602728	43.31768539	4.30632008	-0.000539048	-0.14353344	-0.000616223	0.017798617	-0.008752203	Pianka 1995, Thompson and Pianka 2001, Cogger 2000, James et al. 1992, Pianka and King 2004, Wilson and Swan 2003, Rogner 1997b, Greer 1989, De Lisle 1996, King et al. 1989, Pengilley 1981, Sweet and Pianka 2007, Clusella-Trullas et al. 2008, Horn and Visser 1997, Eidenmueller and Philippen 2008, Thompson et al. 2008, Kohler 2005, Frydlova and Frynta 2010, Arbuckle 2009
Varanus yemenensis	NA	590	3.662706258	NA	NA	NA	NA	32.71421396	35.4805272	43.00996814	3.542750865	-0.000290425	-0.12439294	0.002719456	0.016671527	-0.004062699	Pianka 1995, Pianka and King 2004, Schatti and Desvoignes 1999, Eidenmueller and Philippen 2008, Arbuckle 2009
Varanus zugorum	NA	NA	NA	NA	NA	NA	NA	34.93972246	34.55774365	43.17577698	5.53870768	NA	NA	NA	NA	NA	Bohme and Ziegler 2005, Philipp et al. 2007, Eidenmueller and Philippen 2008
Xenagama batillifera	NA	100.6	1.53206673	NA	NA	NA	NA	37.15420636	36.47310071	44.39220226	9.180111729	-0.000561163	-0.156592223	0.000245058	0.01989744	-0.006028722	Parker 1942, Boulenger 1898, Barts 2004, Manthey and Schuster 1996, Largen and Spawls 2006, Largen and Spawls 2010
Xenagama taylori	NA	86	1.320617691	NA	NA	NA	NA	37.07685165	36.50904309	44.38046296	9.644744608	-0.000561163	-0.156592223	0.000245058	0.01989744	-0.006028722	Parker 1942, Largen and Spawls 2006, Kohler 2005, Largen and Spawls 2010, Macey et al. 2006
Zonosaurus aeneus	NA	76	1.019309932	NA	NA	NA	NA	31.8062335	32.00194078	42.08183535	8.814788144	-0.001571104	-0.023853724	-0.009574256	0.019506211	-0.011414049	Glaw and Vences 1994, Raselimanana 2004, Raselimanana et al. 2000, Rogner 1997b, Ramanamanjato 2000, Vences et al. 1999, Glaw and Vences 2007, Vences et al. 1996
Zonosaurus brygooi	NA	78	1.054111849	NA	NA	NA	NA	31.89835079	32.04261038	42.10957268	8.740049593	-0.001803796	-0.020897368	-0.009481541	0.019605217	-0.01116323	Glaw and Vences 1994, Raselimanana 2004, Vences et al. 1999, Glaw and Vences 2007, Vences et al. 1996
Zonosaurus haraldmeieri	NA	140	1.83780499	NA	NA	NA	NA	32.10566473	31.86281194	42.12727685	7.016247388	NA	NA	NA	NA	NA	Glaw and Vences 1994, Henkel and Schmidt 2000, Raselimanana 2004, Rogner 1997b, Glaw and Vences 2007, Kohler 2005
Zonosaurus karsteni	NA	133	1.769082312	NA	NA	NA	NA	32.26655752	31.98366225	42.18393379	7.171321128	-0.001571104	-0.023853724	-0.009574256	0.019506211	-0.011414049	Glaw and Vences 1994, Henkel and Schmidt 2000, Raselimanana 2004, Rogner 1997b, Glaw and Vences 2007, Kohler 2005
Zonosaurus madagascariensis	NA	140	1.83780499	NA	NA	NA	NA	32.10566473	31.86281194	42.12727685	7.016247388	-0.001571104	-0.023853724	-0.009574256	0.019506211	-0.011414049	Glaw and Vences 1994, Henkel and Schmidt 2000, Raselimanana 2004, Rogner 1997b, Glaw and Vences 2007, Toledo et al. 2007
Zonosaurus quadrilineatus	NA	165	2.057937968	NA	NA	NA	NA	32.37223001	31.93456219	42.19997058	6.536596869	NA	NA	NA	NA	NA	Glaw and Vences 1994, Henkel and Schmidt 2000, Raselimanana 2004, Rogner 1997b, Glaw and Vences 2007
Zonosaurus trilineatus	NA	155	1.974173289	NA	NA	NA	NA	32.34158625	31.94880062	42.19532011	6.720659299	-0.001338412	-0.026810081	-0.00966697	0.019407206	-0.011664869	Glaw and Vences 1994, Henkel and Schmidt 2000, Raselimanana 2004, Glaw and Vences 2007
Zootoca vivipara	34.3	77	1.02403413	NA	43.9	1.9	NA	34.3	31.9	43.9	1.9	-0.000475388	0.128461468	-0.018001685	0.002481913	-0.017945095	Tinkle et al. 1970, Clobert et al. 1998, Dunham and Miles 1985, Fitch 1970, Bauwens and Diaz-Uriarte 1997, Arnold and Ovenden 2004, Szczerbak 2003, Perry and Garland 2002, Cox et al. 2003, Goris and Maeda 2004, Spellerberg 2002, Arnold 1987, Vanhooydonck and Van Damme 1999, Street 1979, Arnold 1998, Rogner 1997b, Uetz 2006, Sindaco et al. 2006, Chamaille-Jammes et al. 2006, Corti and Cascio 2002,…
